# Supplementary material for: Mechanistic insight into anti-carbometalation of an alkyne via η2-vinyl-nickel type Z/E isomerization
Source: Royal Society of Chemistry journal article supplement (doi:10.1039/d3qo00723e), 2023-01-01
Supplement: d3qo00723e1.pdf [file d3qo00723e1.pdf]

## *Supporting Information*

### **Mechanistic insight into *anti*-carbometalation of the alkyne via $\eta^2$ -vinyl-nickel type *E/Z* isomerization**

Chunhui Shan,<sup>\*a</sup> Miaomiao He,<sup>a</sup> Xiaoling Luo,<sup>a</sup> Rong Li<sup>a</sup> and Tao Zhang<sup>\*b</sup>

<sup>a</sup> Chongqing Key Laboratory of Inorganic Functional Materials, College of Chemistry, Chongqing Normal University, Chongqing 401331, China.

<sup>b</sup> ZhengZhou JiShu Institute of AI Science, Zhengzhou, Henan 450000, China.

E-mail: chunhui.shan@cqnu.edu (Chunhui Shan); zhangt@zzu.edu.cn (Tao Zhang)

#### ***Table of Content***

|                                                                            |           |
|----------------------------------------------------------------------------|-----------|
| <b>1. Complete reference for Gaussian 09.....</b>                          | <b>S2</b> |
| <b>2. Mechanistic study of another possible mechanism .....</b>            | <b>S2</b> |
| <b>3. Cartesian coordinates and energies of optimized structures .....</b> | <b>S3</b> |

## 1. Complete reference for Gaussian 09

Gaussian 09, Revision D.01, M. J. Frisch, G. W. Trucks, H. B. Schlegel, G. E. Scuseria, M. A. Robb, J. R. Cheeseman, G. Scalmani, V. Barone, B. Mennucci, G. A. Petersson, H. Nakatsuji, M. Caricato, X. Li, H. P. Hratchian, A. F. Izmaylov, J. Bloino, G. Zheng, J. L. Sonnenberg, M. Hada, M. Ehara, K. Toyota, R. Fukuda, J. Hasegawa, M. Ishida, T. Nakajima, Y. Honda, O. Kitao, H. Nakai, T. Vreven, J. A. Montgomery, Jr., J. E. Peralta, F. Ogliaro, M. Bearpark, J. J. Heyd, E. Brothers, K. N. Kudin, V. N. Staroverov, T. Keith, R. Kobayashi, J. Normand, K. Raghavachari, A. Rendell, J. C. Burant, S. S. Iyengar, J. Tomasi, M. Cossi, N. Rega, J. M. Millam, M. Klene, J. E. Knox, J. B. Cross, V. Bakken, C. Adamo, J. Jaramillo, R. Gomperts, R. E. Stratmann, O. Yazyev, A. J. Austin, R. Cammi, C. Pomelli, J. W. Ochterski, R. L. Martin, K. Morokuma, V. G. Zakrzewski, G. A. Voth, P. Salvador, J. J. Dannenberg, S. Dapprich, A. D. Daniels, O. Farkas, J. B. Foresman, J. V. Ortiz, J. Cioslowski, and D. J. Fox, Gaussian, Inc., Wallingford CT, **2013**.

## 2. Another possible mechanism

An alternative route in which the ring-expansion product is generated was calculated, too. As shown in Figure S1, after the alkenylnickel intermediate **5a** is generated, the carbonyl is inserted into Ni-C bond via transition state **19-ts** to generate nickel alkoxide intermediate **20** with an activation free energy of 12.6 kcal/mol. However, this process is endergonic with a free energy of 10.7 kcal/mol, which could be attributed to the higher ring strain of the resulting quaternary. Then 1,3-nickel migrate proceeds via transition state **21-ts** to generate ring-expansion intermediate **22** with an energy barrier of 23.0 kcal/mol. Correspondingly, transmetallation via transition state **23-ts** leads to the generation of the ring-expansion borate, which could further undergo protonolysis with water to yield the ring-expansion product. The calculation results showed that the overall activation energy is 33.7 kcal/mol, which is 11.8 kcal/mol higher than the generation pathway of 5,5-bicycle product in Fig. 3. Another possible oxidative addition mechanism has also been calculated via transition state **25-ts**. However, the calculated reaction energy for this process is as high as 39.2 kcal/mol revealing an unfavorable process.

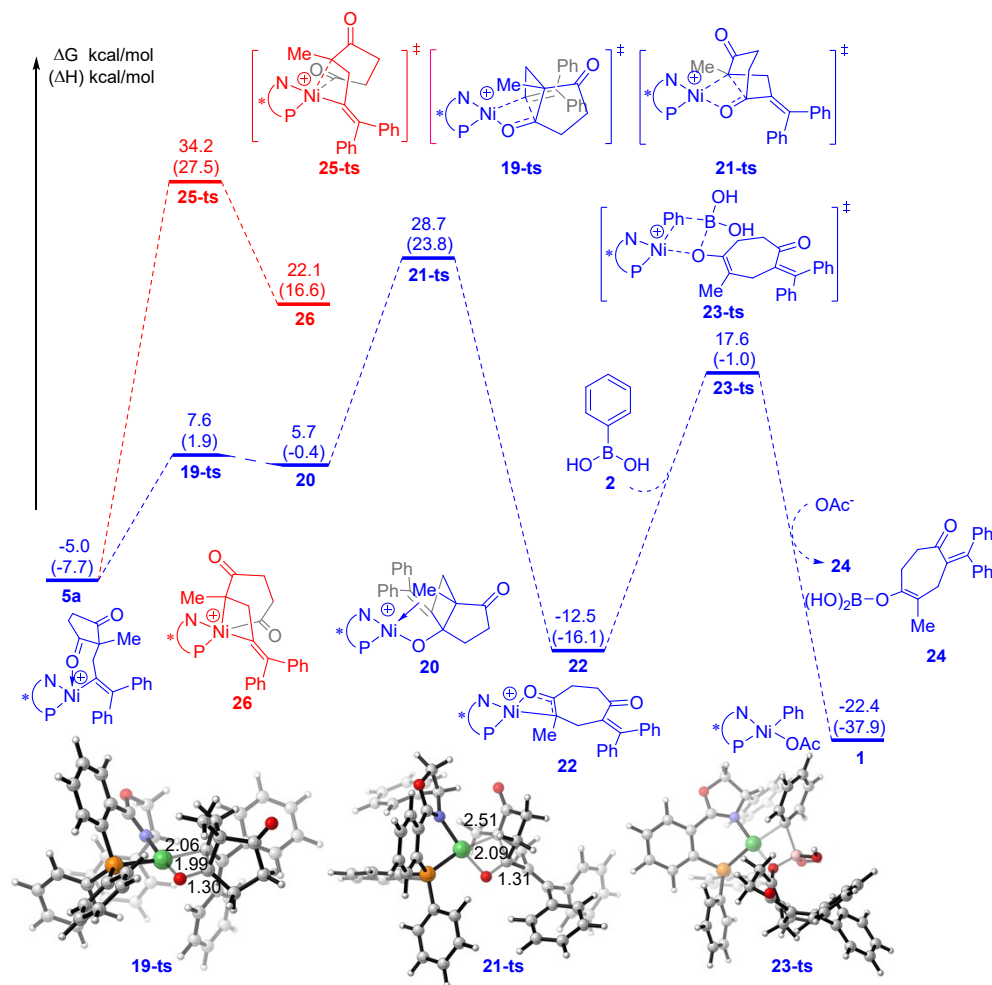

**Figure S1.** Free energy profile of the synthesis of ring-expansion products of nickel-catalyzed transformation. The bond lengths are given in angstroms.

### 3. Cartesian coordinates and energies of optimized structures

**1**  
 B3LYP SCF energy: -2142.901967 a.u.  
 B3LYP enthalpy: -2142.300803 a.u.  
 B3LYP free energy: -2142.411623 a.u.  
 M06 SCF energy in solution: -2142.274117 a.u.

| Cartesian coordinates |             |             |             |   |             |             |             |
|-----------------------|-------------|-------------|-------------|---|-------------|-------------|-------------|
| ATOM                  | X           | Y           | Z           |   |             |             |             |
| Ni                    | 0.55142000  | -1.11715600 | -0.03058300 | C | -1.78063900 | 0.47748700  | 1.70128900  |
| C                     | 2.92342200  | -1.84788400 | -1.12382500 | C | -0.72693300 | 0.96925900  | 2.51355400  |
| C                     | 4.17547800  | -2.71912000 | -1.16998600 | C | -1.00454900 | 1.44112100  | 3.80591000  |
| H                     | 4.78010700  | -2.58389500 | -0.26705600 | C | -2.30386000 | 1.43166200  | 4.30814100  |
| H                     | 3.87174900  | -3.77212400 | -1.20186900 | C | -3.34328100 | 0.95193600  | 3.51547900  |
| H                     | 4.76819400  | -2.49221500 | -2.05899100 | H | -3.89625500 | 0.10061700  | 1.62484500  |
| O                     | 2.30792900  | -1.86550200 | 0.02161900  | H | -0.18820000 | 1.81458600  | 4.41250100  |
| O                     | 2.56071300  | -1.19893900 | -2.11491200 | H | -2.49787400 | 1.79602900  | 5.31266000  |
| C                     | -3.07826700 | 0.48050100  | 2.22688200  | H | -4.36185500 | 0.93820000  | 3.89341900  |
|                       |             |             |             | C | 0.66982900  | 1.04427700  | 2.04760400  |
|                       |             |             |             | O | 1.51524200  | 1.74443200  | 2.84337300  |
|                       |             |             |             | C | 2.84696800  | 1.51620900  | 2.30287200  |
|                       |             |             |             | C | 2.57780900  | 1.06321900  | 0.85789100  |
|                       |             |             |             | H | 3.40732600  | 2.44661900  | 2.39061200  |
|                       |             |             |             | H | 3.31822000  | 0.73314800  | 2.90626100  |
|                       |             |             |             | H | 3.20900200  | 0.22155900  | 0.57824300  |
|                       |             |             |             | N | 1.17825800  | 0.54811500  | 0.97122000  |
|                       |             |             |             | P | -1.45214100 | -0.18371200 | -0.00353100 |

|   |             |             |             |
|---|-------------|-------------|-------------|
| C | -2.99705300 | -1.09666000 | -0.41008900 |
| C | -3.94478500 | -0.61247800 | -1.32289300 |
| C | -3.21698200 | -2.34042600 | 0.20675200  |
| C | -5.09529300 | -1.35338200 | -1.60577200 |
| H | -3.78731800 | 0.33829500  | -1.82035200 |
| C | -4.36920900 | -3.07222000 | -0.07244200 |
| H | -2.47360400 | -2.75085100 | 0.88206300  |
| C | -5.31160100 | -2.58051300 | -0.97955100 |
| H | -5.81868100 | -0.96859400 | -2.31965500 |
| H | -4.52161000 | -4.03538000 | 0.40632500  |
| H | -6.20503900 | -3.15726500 | -1.20346600 |
| C | -1.46164100 | 1.30669900  | -1.08167400 |
| C | -0.55081700 | 1.35029100  | -2.14939600 |
| C | -2.34087900 | 2.38283300  | -0.87973600 |
| C | -0.53794500 | 2.44838000  | -3.01185900 |
| H | 0.16198600  | 0.54162700  | -2.29377300 |
| C | -2.32237000 | 3.47755200  | -1.74401400 |
| H | -3.03775300 | 2.36795500  | -0.04620200 |
| C | -1.42312100 | 3.50870600  | -2.81322800 |
| H | 0.17724300  | 2.47757400  | -3.82829300 |
| H | -3.00616200 | 4.30637500  | -1.58057400 |
| H | -1.40724500 | 4.36375600  | -3.48390600 |
| C | 2.68424700  | 2.17234300  | -0.18207200 |
| C | 2.28011300  | 3.48385700  | 0.11299800  |
| C | 3.20127900  | 1.89307200  | -1.45340700 |
| C | 2.40646200  | 4.49814600  | -0.83567200 |
| H | 1.86212800  | 3.72048800  | 1.08854300  |
| C | 3.32918400  | 2.91087200  | -2.40187500 |
| H | 3.46656200  | 0.87333700  | -1.71566700 |
| C | 2.93886800  | 4.21512600  | -2.09584800 |
| H | 2.09196100  | 5.50894900  | -0.58916200 |
| H | 3.73655800  | 2.67825400  | -3.38233600 |
| H | 3.04567600  | 5.00673400  | -2.83315500 |
| C | 0.00355700  | -3.90270100 | 0.07748300  |
| C | -0.04965200 | -2.76749300 | -0.74625000 |
| C | -0.48889400 | -2.92944600 | -2.06726300 |
| C | -0.87865300 | -4.18479100 | -2.54795900 |
| C | -0.84247700 | -5.30217500 | -1.71173300 |
| C | -0.39781900 | -5.15715400 | -0.39533900 |
| H | 0.37807600  | -3.81680000 | 1.09574900  |
| H | -0.52289300 | -2.07628700 | -2.74101500 |
| H | -1.21120900 | -4.28715500 | -3.57913300 |
| H | -1.14884900 | -6.27706700 | -2.08379500 |
| H | -0.34983200 | -6.02361500 | 0.26201400  |

## 2

B3LYP SCF energy: -730.400114 a.u.

B3LYP enthalpy: -730.133298 a.u.

B3LYP free energy: -730.196226 a.u.

M06 SCF energy in solution: -730.118661 a.u.

### Cartesian coordinates

| ATOM | X           | Y           | Z           |
|------|-------------|-------------|-------------|
| C    | -2.96957200 | -0.88434700 | 0.33901000  |
| C    | -1.44881200 | -0.78029100 | 0.54400500  |
| C    | -1.14405800 | 0.72340000  | 0.56736100  |
| C    | -2.25730100 | 1.48375000  | -0.16584400 |
| C    | -3.42008300 | 0.47983600  | -0.20141800 |
| H    | -3.28771500 | -1.68175800 | -0.33957900 |
| H    | -3.49605800 | -1.05232200 | 1.28785100  |
| H    | -0.90074200 | -1.22421100 | -0.29856200 |
| H    | -1.07336000 | -1.25428600 | 1.45452700  |

|   |             |            |             |
|---|-------------|------------|-------------|
| O | -4.53198200 | 0.73141300 | -0.61152400 |
| O | -0.18568100 | 1.23086900 | 1.10625200  |
| C | -2.63231600 | 2.80152500 | 0.52021300  |
| H | -1.77870000 | 3.48382800 | 0.50563200  |
| H | -3.47883300 | 3.26288900 | 0.00223200  |
| H | -2.91871500 | 2.63443300 | 1.56390200  |
| C | -1.84092500 | 1.72798500 | -1.66421800 |
| H | -1.67535200 | 0.76235200 | -2.16455900 |
| H | -2.71092000 | 2.17978400 | -2.15859500 |
| C | -0.65694000 | 2.56592400 | -1.80661600 |
| C | 0.34982100  | 3.23787800 | -1.87523400 |
| C | 1.55316000  | 4.00767200 | -1.90652400 |
| C | 1.88158300  | 4.80457400 | -3.01934500 |
| C | 2.43191600  | 3.97007400 | -0.80563000 |
| C | 3.06231200  | 5.54406100 | -3.02862500 |
| H | 1.20531600  | 4.83518600 | -3.86828500 |
| C | 3.60931000  | 4.71372700 | -0.82396800 |
| H | 2.17278000  | 3.35458000 | 0.05058300  |
| C | 3.92883600  | 5.50152800 | -1.93337700 |
| H | 3.30676500  | 6.15568300 | -3.89298600 |
| H | 4.28027600  | 4.67839000 | 0.03013800  |
| H | 4.84872500  | 6.07987900 | -1.94413600 |

## 3

B3LYP SCF energy: -2644.636413 a.u.

B3LYP enthalpy: -2643.822523 a.u.

B3LYP free energy: -2643.962388 a.u.

M06 SCF energy in solution: -2643.817067 a.u.

### Cartesian coordinates

| ATOM | X           | Y          | Z           |
|------|-------------|------------|-------------|
| Ni   | 0.04889300  | 3.56929900 | 3.92797800  |
| C    | 0.17217400  | 6.01832200 | 7.71276800  |
| C    | -0.32294500 | 5.60005700 | 6.47175800  |
| C    | -0.71689200 | 6.58724900 | 5.53547100  |
| C    | -0.60630300 | 7.94657600 | 5.86697700  |
| C    | -0.09980300 | 8.34153900 | 7.10366100  |
| C    | 0.28829400  | 7.37549300 | 8.02802200  |
| H    | 0.47320100  | 5.27900200 | 8.44572500  |
| H    | -0.91864400 | 8.69080100 | 5.14424900  |
| H    | -0.01424200 | 9.39762700 | 7.33986800  |
| H    | 0.67953100  | 7.66833600 | 8.99787000  |
| C    | -1.27335600 | 6.26029900 | 4.20945800  |
| O    | -1.95389200 | 7.25649400 | 3.62211400  |
| C    | -2.30181000 | 6.81456200 | 2.28432300  |
| C    | -1.96053100 | 5.30217300 | 2.28281700  |
| H    | -3.35988000 | 7.02623700 | 2.12872200  |
| H    | -1.69565500 | 7.38944500 | 1.57895800  |
| H    | -1.29895900 | 5.06811700 | 1.44921400  |
| N    | -1.18129700 | 5.14942100 | 3.55015100  |
| P    | -0.48231700 | 3.79604700 | 6.09428800  |
| C    | 0.46192700  | 2.97044200 | 7.43310600  |
| C    | -0.18072700 | 2.23631800 | 8.44066700  |
| C    | 1.86253100  | 3.08757700 | 7.45525100  |
| C    | 0.56700100  | 1.62993300 | 9.45305000  |
| H    | -1.26016500 | 2.13333900 | 8.44168300  |
| C    | 2.60188700  | 2.48827300 | 8.47203000  |
| H    | 2.37825200  | 3.63510000 | 6.67339100  |
| C    | 1.95567500  | 1.75567100 | 9.47200900  |
| H    | 0.05889000  | 1.06070100 | 10.22600200 |
| H    | 3.68364600  | 2.58441500 | 8.47811000  |
| H    | 2.53480700  | 1.28288200 | 10.25992400 |

|   |             |             |             |
|---|-------------|-------------|-------------|
| C | -2.24435800 | 3.39889500  | 6.43208900  |
| C | -2.81458400 | 2.27247600  | 5.81889700  |
| C | -3.01282500 | 4.15157900  | 7.33505600  |
| C | -4.12246000 | 1.89144000  | 6.12007400  |
| H | -2.24094600 | 1.69179400  | 5.10301300  |
| C | -4.32590100 | 3.77511800  | 7.62264400  |
| H | -2.58924900 | 5.02532500  | 7.82053900  |
| C | -4.87962300 | 2.64184200  | 7.02196800  |
| H | -4.54991100 | 1.01427200  | 5.64357400  |
| H | -4.91247800 | 4.36363800  | 8.32223800  |
| H | -5.89820600 | 2.34581000  | 7.25609200  |
| C | -3.17744000 | 4.39915600  | 2.19457100  |
| C | -4.14300100 | 4.36503800  | 3.20929000  |
| C | -3.38960400 | 3.65410600  | 1.02650900  |
| C | -5.29862700 | 3.59825600  | 3.05818000  |
| H | -3.99669100 | 4.93633300  | 4.12227200  |
| C | -4.54733200 | 2.88679200  | 0.87574100  |
| H | -2.65300800 | 3.68916800  | 0.22712000  |
| C | -5.50414400 | 2.85747100  | 1.89142100  |
| H | -6.03895400 | 3.58134600  | 3.85250100  |
| H | -4.70511200 | 2.32022900  | -0.03783600 |
| H | -6.40726300 | 2.26552700  | 1.77335000  |
| C | 0.75543400  | 0.85285700  | 4.71930900  |
| C | 1.22491800  | 2.11703600  | 4.33437400  |
| C | 2.60770700  | 2.28528800  | 4.16499600  |
| C | 3.49401100  | 1.22442600  | 4.37997400  |
| C | 3.01148000  | -0.03196500 | 4.75307600  |
| C | 1.63844200  | -0.21611800 | 4.91635500  |
| H | -0.30654900 | 0.67588000  | 4.87300600  |
| H | 3.01378700  | 3.24196900  | 3.84492000  |
| H | 4.56163700  | 1.37989100  | 4.24297300  |
| H | 3.69843000  | -0.85825500 | 4.91289900  |
| H | 1.24786200  | -1.18886800 | 5.20435800  |
| C | -0.50506600 | -0.34690500 | -1.83125600 |
| C | -0.45969200 | 1.09414000  | -2.37986100 |
| C | -0.21627500 | 2.00201400  | -1.17135900 |
| C | 0.31859500  | 1.16943900  | -0.00388100 |
| C | -0.20070300 | -0.24392200 | -0.33211400 |
| H | -1.47989400 | -0.82903400 | -1.95658500 |
| H | 0.23029900  | -1.00971200 | -2.30157300 |
| H | -1.37713300 | 1.40782600  | -2.88646900 |
| H | 0.35751100  | 1.24348200  | -3.09670600 |
| O | -0.35433500 | -1.12432900 | 0.48230700  |
| O | -0.44389900 | 3.19569300  | -1.14111400 |
| C | 1.86981200  | 1.12156400  | -0.08957500 |
| H | 2.28723200  | 2.12446000  | 0.03575100  |
| H | 2.25776700  | 0.47379500  | 0.70296000  |
| H | 2.21040500  | 0.72669800  | -1.05261600 |
| C | -0.17433700 | 1.62104800  | 1.38960200  |
| H | -1.27089600 | 1.66168800  | 1.39446300  |
| H | 0.11439100  | 0.85008100  | 2.11231300  |
| C | 0.36496200  | 2.92193500  | 1.80506000  |
| C | 0.95761700  | 3.99375900  | 1.92846500  |
| C | 1.59164900  | 5.26366300  | 1.70004600  |
| C | 2.30661700  | 5.94770100  | 2.70011900  |
| C | 1.49328400  | 5.82553000  | 0.40934500  |
| C | 2.91112500  | 7.17020200  | 2.41451800  |
| H | 2.38683500  | 5.51766700  | 3.69364300  |
| C | 2.10582900  | 7.04635400  | 0.13505400  |
| H | 0.94409000  | 5.28974600  | -0.35915600 |
| C | 2.81310600  | 7.72138500  | 1.13407400  |
| H | 3.46479400  | 7.69057700  | 3.19056900  |
| H | 2.03247100  | 7.47083300  | -0.86205500 |

|   |            |            |            |
|---|------------|------------|------------|
| H | 3.28964600 | 8.67228500 | 0.91437300 |
|---|------------|------------|------------|

#### 4-ts

B3LYP SCF energy: -2644.61413 a.u.

B3LYP enthalpy: -2643.801435 a.u.

B3LYP free energy: -2643.936009 a.u.

M06 SCF energy in solution: -2643.79502 a.u.

Imaginary frequency: -281.10 cm<sup>-1</sup>

#### Cartesian coordinates

| ATOM | X           | Y           | Z           |
|------|-------------|-------------|-------------|
| Ni   | 0.02419100  | 0.20741800  | 0.43157500  |
| C    | 4.35371700  | -0.03752100 | 1.83869600  |
| C    | 3.14464200  | -0.49543800 | 1.30164600  |
| C    | 2.60473700  | -1.70360800 | 1.80853400  |
| C    | 3.27493800  | -2.40418400 | 2.82294400  |
| C    | 4.46761500  | -1.91868800 | 3.35513700  |
| C    | 5.00886500  | -0.73586000 | 2.85783100  |
| H    | 4.79323500  | 0.87931700  | 1.46303300  |
| H    | 2.85234600  | -3.33294700 | 3.18863400  |
| H    | 4.97022500  | -2.46639900 | 4.14622000  |
| H    | 5.94318300  | -0.35040000 | 3.25552400  |
| C    | 1.37572300  | -2.30689100 | 1.26659500  |
| O    | 1.26118900  | -3.63554100 | 1.43147200  |
| C    | -0.06904900 | -4.00077000 | 0.96497600  |
| C    | -0.49830800 | -2.79720000 | 0.10467500  |
| H    | 0.01722300  | -4.93798300 | 0.41662100  |
| H    | -0.70287000 | -4.13227000 | 1.84691300  |
| H    | -1.52470300 | -2.51706400 | 0.33066400  |
| N    | 0.41060000  | -1.72429400 | 0.63040800  |
| P    | 2.28761400  | 0.44105600  | -0.05423300 |
| C    | 3.09145500  | 2.09346400  | -0.01656100 |
| C    | 3.78385600  | 2.60689500  | -1.12381200 |
| C    | 2.98624300  | 2.87825000  | 1.14512700  |
| C    | 4.36310800  | 3.87647200  | -1.06623200 |
| H    | 3.87912200  | 2.01917400  | -2.03032400 |
| C    | 3.57533700  | 4.14008500  | 1.20164800  |
| H    | 2.45133800  | 2.50190300  | 2.01205000  |
| C    | 4.26363800  | 4.64342400  | 0.09477700  |
| H    | 4.89833600  | 4.26032300  | -1.93006400 |
| H    | 3.49357800  | 4.73168800  | 2.10902800  |
| H    | 4.72118400  | 5.62760400  | 0.13921200  |
| C    | 2.89673500  | -0.32882100 | -1.60739600 |
| C    | 2.06799300  | -0.29524500 | -2.73876900 |
| C    | 4.18599100  | -0.87483100 | -1.71685600 |
| C    | 2.52776100  | -0.77753300 | -3.96499100 |
| H    | 1.05860200  | 0.09797000  | -2.66061400 |
| C    | 4.63746500  | -1.36851800 | -2.94094700 |
| H    | 4.84046100  | -0.91040700 | -0.85118400 |
| C    | 3.81239200  | -1.31371600 | -4.06734100 |
| H    | 1.87721900  | -0.74594100 | -4.83364400 |
| H    | 5.63589100  | -1.78991300 | -3.01604000 |
| H    | 4.16983100  | -1.69190600 | -5.02091200 |
| C    | -0.36864600 | -2.99743700 | -1.39555100 |
| C    | 0.73948100  | -3.65121600 | -1.95425200 |
| C    | -1.40228800 | -2.56613000 | -2.23713400 |
| C    | 0.80637400  | -3.88033400 | -3.32776100 |
| H    | 1.55297600  | -3.99142700 | -1.31775700 |
| C    | -1.33092200 | -2.79060200 | -3.61454700 |
| H    | -2.27344000 | -2.07196700 | -1.81459100 |
| C    | -0.23037600 | -3.45179600 | -4.16146400 |
| H    | 1.66548400  | -4.39636600 | -3.74652000 |

|   |             |             |             |
|---|-------------|-------------|-------------|
| H | -2.14553500 | -2.46446100 | -4.25536800 |
| H | -0.18309900 | -3.64156800 | -5.23024600 |
| C | -0.19971500 | 2.74252000  | -1.05393400 |
| C | -0.43218200 | 2.11138700  | 0.18650700  |
| C | -0.47608200 | 2.90975100  | 1.34535400  |
| C | -0.26546700 | 4.28927600  | 1.27329400  |
| C | -0.03804200 | 4.89732600  | 0.03809000  |
| C | -0.00509200 | 4.11885500  | -1.12578900 |
| H | -0.17611600 | 2.15420200  | -1.96791400 |
| H | -0.71848500 | 2.45369500  | 2.30122600  |
| H | -0.30681500 | 4.88996900  | 2.17799700  |
| H | 0.09972100  | 5.97280700  | -0.02403200 |
| H | 0.17217200  | 4.58953100  | -2.08896200 |
| C | -6.55907000 | 1.78672200  | -1.75716900 |
| C | -6.34914900 | 0.26774300  | -1.61117500 |
| C | -4.95266200 | 0.08852300  | -1.01077000 |
| C | -4.50099000 | 1.39093500  | -0.34875700 |
| C | -5.34942700 | 2.45170800  | -1.09291900 |
| H | -6.60144400 | 2.11585000  | -2.80101000 |
| H | -7.47739100 | 2.14901900  | -1.28210100 |
| H | -6.41278700 | -0.28808700 | -2.55087300 |
| H | -7.07812500 | -0.18776900 | -0.92858800 |
| O | -5.08512500 | 3.63052400  | -1.13366600 |
| O | -4.29917200 | -0.93370900 | -1.08672200 |
| C | -4.98428800 | 1.42905200  | 1.12872100  |
| H | -4.49927000 | 0.64980500  | 1.72019400  |
| H | -4.74477000 | 2.40739600  | 1.55780800  |
| H | -6.06799200 | 1.28600700  | 1.20290000  |
| C | -3.00611400 | 1.73537800  | -0.50065700 |
| H | -2.72213900 | 1.63119600  | -1.55519300 |
| H | -2.90770900 | 2.80138900  | -0.27215300 |
| C | -2.02392900 | 0.95539900  | 0.32382400  |
| C | -1.79849100 | 0.02900600  | 1.17243000  |
| C | -2.24725700 | -0.90843400 | 2.19139200  |
| C | -1.59370600 | -0.93630800 | 3.43939400  |
| C | -3.32551500 | -1.78995500 | 1.97268600  |
| C | -2.01697200 | -1.80385800 | 4.44451000  |
| H | -0.75921200 | -0.26381700 | 3.61606000  |
| C | -3.73566900 | -2.66449200 | 2.97983900  |
| H | -3.82599300 | -1.78582600 | 1.01060000  |
| C | -3.08742700 | -2.67333600 | 4.21741200  |
| H | -1.51045200 | -1.80223500 | 5.40551100  |
| H | -4.56871700 | -3.33752500 | 2.79676900  |
| H | -3.41486700 | -3.35129100 | 5.00027200  |

## 5Z

B3LYP SCF energy: -2644.675489 a.u.

B3LYP enthalpy: -2643.860649 a.u.

B3LYP free energy: -2643.998025 a.u.

M06 SCF energy in solution: -2643.855353 a.u.

## Cartesian coordinates

| ATOM | X          | Y           | Z          |
|------|------------|-------------|------------|
| Ni   | 1.22458100 | 3.58968800  | 1.52280100 |
| C    | 3.41587800 | -0.15118500 | 2.59233700 |
| C    | 2.73122500 | 0.73656200  | 1.75391100 |
| C    | 1.77947500 | 0.20504000  | 0.84767800 |
| C    | 1.56295200 | -1.17947800 | 0.78839400 |
| C    | 2.25294900 | -2.04409400 | 1.63613700 |
| C    | 3.17604900 | -1.52797300 | 2.54220300 |
| H    | 4.15050800 | 0.23153400  | 3.29168100 |
| H    | 0.84080400 | -1.57077400 | 0.08096200 |

|   |             |             |             |
|---|-------------|-------------|-------------|
| H | 2.06699400  | -3.11239000 | 1.58631500  |
| H | 3.71995400  | -2.19069600 | 3.20878300  |
| C | 0.97436600  | 1.05522400  | -0.04340900 |
| O | 0.42926000  | 0.45732700  | -1.11432800 |
| C | -0.24295300 | 1.48700300  | -1.89085500 |
| C | -0.20169300 | 2.74291500  | -0.98232200 |
| H | 0.31341300  | 1.61539700  | -2.82248600 |
| H | -1.25191700 | 1.13593200  | -2.11105400 |
| H | -1.18711600 | 2.91780400  | -0.53414500 |
| N | 0.70618100  | 2.30856500  | 0.11534000  |
| P | 3.14919800  | 2.54356400  | 1.78274500  |
| C | 4.09353400  | 2.76700500  | 3.33528500  |
| C | 5.48012400  | 2.97590000  | 3.33654500  |
| C | 3.39879800  | 2.72487200  | 4.55684600  |
| C | 6.16224500  | 3.14065300  | 4.54476200  |
| H | 6.02891500  | 3.01456900  | 2.40167400  |
| C | 4.08619000  | 2.88219700  | 5.75888900  |
| H | 2.32344200  | 2.57186900  | 4.56743600  |
| C | 5.46888900  | 3.09424600  | 5.75455400  |
| H | 7.23576900  | 3.30530100  | 4.53643300  |
| H | 3.54404000  | 2.84418400  | 6.69940300  |
| H | 6.00137700  | 3.22253700  | 6.69249500  |
| C | 4.35210700  | 2.74372200  | 0.40849500  |
| C | 4.54159700  | 4.02135000  | -0.14315800 |
| C | 5.10452100  | 1.66228100  | -0.08026000 |
| C | 5.47786700  | 4.21202600  | -1.16037500 |
| H | 3.96458300  | 4.86538900  | 0.21912900  |
| C | 6.03274400  | 1.85973000  | -1.10356500 |
| H | 4.97186900  | 0.66787100  | 0.33371800  |
| C | 6.22210800  | 3.13380000  | -1.64362500 |
| H | 5.62240700  | 5.20592000  | -1.57398700 |
| H | 6.60872800  | 1.01741800  | -1.47579500 |
| H | 6.94757800  | 3.28463900  | -2.43791500 |
| C | 0.24810800  | 4.02500800  | -1.65562900 |
| C | 1.47593000  | 4.09643700  | -2.33074100 |
| C | -0.57116100 | 5.15947100  | -1.60980900 |
| C | 1.86952300  | 5.27999100  | -2.95353300 |
| H | 2.13177900  | 3.23005700  | -2.36797600 |
| C | -0.17640800 | 6.34639300  | -2.23194600 |
| H | -1.52531400 | 5.11886200  | -1.08963900 |
| C | 1.04328700  | 6.40704000  | -2.90715700 |
| H | 2.82014200  | 5.32126900  | -3.47735700 |
| H | -0.82447300 | 7.21658700  | -2.18980000 |
| H | 1.34839600  | 7.32594800  | -3.39959200 |
| C | -0.95372300 | 3.64935200  | 2.53067000  |
| C | -0.34215000 | 4.07446500  | 3.73300400  |
| C | -0.63168300 | 3.37369300  | 4.91743800  |
| C | -1.46859600 | 2.26095500  | 4.89118400  |
| C | -2.04460200 | 1.82521100  | 3.68811100  |
| C | -1.79319900 | 2.52352400  | 2.51161900  |
| H | -0.91828200 | 4.33088000  | 1.67477400  |
| H | -0.18391800 | 3.69186200  | 5.85496700  |
| H | -1.67756700 | 1.72424900  | 5.81250300  |
| H | -2.70498500 | 0.96318100  | 3.68346800  |
| H | -2.27556100 | 2.22037900  | 1.58604000  |
| C | -0.32194700 | 9.85909000  | 4.18313800  |
| C | -0.18615300 | 9.30121700  | 2.75730000  |
| C | -0.65591900 | 7.84639200  | 2.82872300  |
| C | -0.67995100 | 7.36149800  | 4.28284800  |
| C | -0.42920400 | 8.63895400  | 5.10504900  |
| H | 0.50221200  | 10.50245900 | 4.50411000  |
| H | -1.24265400 | 10.44572700 | 4.30246400  |
| H | 0.86186600  | 9.28817200  | 2.42693000  |

|   |             |            |             |   |             |            |             |
|---|-------------|------------|-------------|---|-------------|------------|-------------|
| H | -0.75232100 | 9.84431500 | 1.99529100  | H | 2.66474100  | 1.71644100 | 10.51061700 |
| O | -0.32838800 | 8.66118600 | 6.31129500  | C | -2.17663200 | 3.16777300 | 6.48580500  |
| O | -0.97089600 | 7.17073300 | 1.86832600  | C | -2.50778100 | 1.92788700 | 5.91600700  |
| C | -2.05446000 | 6.76604100 | 4.64445500  | C | -3.11881200 | 3.82889600 | 7.28901900  |
| H | -2.28554300 | 5.90710800 | 4.01145100  | C | -3.75456200 | 1.35154600 | 6.15971000  |
| H | -2.06108000 | 6.45876600 | 5.69468100  | H | -1.79230900 | 1.41003000 | 5.28347100  |
| H | -2.85040000 | 7.50652300 | 4.50621500  | C | -4.37086300 | 3.25438900 | 7.51873300  |
| C | 0.51201900  | 6.37861000 | 4.57868400  | H | -2.87827100 | 4.78505100 | 7.74346300  |
| H | 1.44772000  | 6.94442800 | 4.54875500  | C | -4.68794800 | 2.01388400 | 6.96051100  |
| H | 0.37976000  | 6.05515000 | 5.61919400  | H | -3.99726100 | 0.38809900 | 5.72102700  |
| C | 0.63126400  | 5.18967900 | 3.65037000  | H | -5.09326200 | 3.77277300 | 8.14271900  |
| C | 1.54402400  | 5.07488000 | 2.65665000  | H | -5.65837000 | 1.56436400 | 7.15087300  |
| C | 2.59006800  | 6.06251700 | 2.32341800  | C | -3.31754900 | 4.20767500 | 2.29658700  |
| C | 3.72387200  | 6.25975900 | 3.13633200  | C | -4.17859700 | 4.04961800 | 3.39005200  |
| C | 2.46767100  | 6.83495500 | 1.14853200  | C | -3.64063900 | 3.58637800 | 1.08226700  |
| C | 4.70001300  | 7.19366300 | 2.78605800  | C | -5.34023700 | 3.28505100 | 3.26752600  |
| H | 3.83400500  | 5.67698400 | 4.04556400  | H | -3.94512300 | 4.51377800 | 4.34350500  |
| C | 3.44435700  | 7.77157800 | 0.80564900  | C | -4.80400300 | 2.82545800 | 0.95803900  |
| H | 1.58950400  | 6.71178700 | 0.52096000  | H | -2.97937700 | 3.70050400 | 0.22617200  |
| C | 4.56642400  | 7.95111700 | 1.61993700  | C | -5.65748000 | 2.67361400 | 2.05249900  |
| H | 5.56460200  | 7.33324600 | 3.42922300  | H | -5.99693400 | 3.16949300 | 4.12454100  |
| H | 3.32613900  | 8.36418500 | -0.09772300 | H | -5.04051400 | 2.35182400 | 0.00960600  |
| H | 5.32581000  | 8.68024000 | 1.35198900  | H | -6.56455500 | 2.08338500 | 1.95893500  |

### 3a

B3LYP SCF energy: -2644.630459 a.u.

B3LYP enthalpy: -2643.816867 a.u.

B3LYP free energy: -2643.957223 a.u.

M06 SCF energy in solution: -2643.814722 a.u.

### Cartesian coordinates

| ATOM | X           | Y          | Z           |
|------|-------------|------------|-------------|
| Ni   | 0.07257700  | 3.61045800 | 4.05732600  |
| C    | -0.24049000 | 6.12502200 | 7.83941100  |
| C    | -0.60273700 | 5.63728500 | 6.57796900  |
| C    | -1.06466300 | 6.55903400 | 5.60499900  |
| C    | -1.13597000 | 7.92564700 | 5.92252800  |
| C    | -0.75555900 | 8.39096700 | 7.17935800  |
| C    | -0.31229000 | 7.48785700 | 8.14141700  |
| H    | 0.10805100  | 5.43467200 | 8.59839100  |
| H    | -1.49303600 | 8.62183100 | 5.17363100  |
| H    | -0.81092800 | 9.45211900 | 7.40115900  |
| H    | -0.02016600 | 7.83419800 | 9.12837500  |
| C    | -1.52516200 | 6.16230300 | 4.26022600  |
| O    | -2.24992400 | 7.09822000 | 3.62412400  |
| C    | -2.47530500 | 6.62419700 | 2.27400900  |
| C    | -2.10542900 | 5.12214600 | 2.34729200  |
| H    | -3.51975700 | 6.80980600 | 2.02423400  |
| H    | -1.82254900 | 7.19785800 | 1.60827000  |
| H    | -1.44001200 | 4.85227800 | 1.52691800  |
| N    | -1.33324500 | 5.04693900 | 3.62370500  |
| P    | -0.48330000 | 3.82910500 | 6.21687300  |
| C    | 0.50876100  | 3.14466200 | 7.60168400  |
| C    | -0.04524400 | 2.23573900 | 8.51565300  |
| C    | 1.85178100  | 3.53311400 | 7.75073800  |
| C    | 0.73217500  | 1.72361300 | 9.55702700  |
| H    | -1.07899900 | 1.92267100 | 8.42253000  |
| C    | 2.61955500  | 3.02472100 | 8.79583400  |
| H    | 2.30339700  | 4.22592200 | 7.04926700  |
| C    | 2.06239800  | 2.11625900 | 9.70002000  |
| H    | 0.29183100  | 1.01883900 | 10.25637000 |
| H    | 3.65599100  | 3.33233400 | 8.89895700  |

|   |             |             |             |
|---|-------------|-------------|-------------|
| H | 2.66474100  | 1.71644100  | 10.51061700 |
| C | -2.17663200 | 3.16777300  | 6.48580500  |
| C | -2.50778100 | 1.92788700  | 5.91600700  |
| C | -3.11881200 | 3.82889600  | 7.28901900  |
| C | -3.75456200 | 1.35154600  | 6.15971000  |
| H | -1.79230900 | 1.41003000  | 5.28347100  |
| C | -4.37086300 | 3.25438900  | 7.51873300  |
| H | -2.87827100 | 4.78505100  | 7.74346300  |
| C | -4.68794800 | 2.01388400  | 6.96051100  |
| H | -3.99726100 | 0.38809900  | 5.72102700  |
| H | -5.09326200 | 3.77277300  | 8.14271900  |
| H | -5.65837000 | 1.56436400  | 7.15087300  |
| C | -3.31754900 | 4.20767500  | 2.29658700  |
| C | -4.17859700 | 4.04961800  | 3.39005200  |
| C | -3.64063900 | 3.58637800  | 1.08226700  |
| C | -5.34023700 | 3.28505100  | 3.26752600  |
| H | -3.94512300 | 4.51377800  | 4.34350500  |
| C | -4.80400300 | 2.82545800  | 0.95803900  |
| H | -2.97937700 | 3.70050400  | 0.22617200  |
| C | -5.65748000 | 2.67361400  | 2.05249900  |
| H | -5.99693400 | 3.16949300  | 4.12454100  |
| H | -5.04051400 | 2.35182400  | 0.00960600  |
| H | -6.56455500 | 2.08338500  | 1.95893500  |
| C | 1.50922300  | 1.16879900  | 4.80498000  |
| C | 1.56792200  | 2.54169500  | 4.54198400  |
| C | 2.81751100  | 3.17776100  | 4.56093000  |
| C | 3.98664200  | 2.45230500  | 4.81922600  |
| C | 3.91861800  | 1.08154900  | 5.07284200  |
| C | 2.67740600  | 0.44322200  | 5.06606300  |
| H | 0.55788100  | 0.64231900  | 4.80134200  |
| H | 2.89947100  | 4.24918200  | 4.38012700  |
| H | 4.94763600  | 2.96163200  | 4.82337600  |
| H | 4.82414700  | 0.51661700  | 5.27555600  |
| H | 2.61286100  | -0.62393300 | 5.26405500  |
| C | 3.89157500  | 6.00582700  | -1.04468300 |
| C | 4.29101300  | 4.53182000  | -0.85165500 |
| C | 3.10057900  | 3.83455500  | -0.18132700 |
| C | 1.98039800  | 4.84947900  | 0.10575300  |
| C | 2.62713700  | 6.21031500  | -0.20950200 |
| H | 4.65505000  | 6.72788300  | -0.74216500 |
| H | 3.64678300  | 6.22965800  | -2.09141300 |
| H | 5.15836500  | 4.41996100  | -0.18922100 |
| H | 4.54566800  | 4.01157400  | -1.78048600 |
| O | 2.18413800  | 7.27391700  | 0.16460200  |
| O | 3.04756900  | 2.65279100  | 0.07911600  |
| C | 0.82279200  | 4.61650300  | -0.89414200 |
| H | 0.39556900  | 3.62053100  | -0.74747700 |
| H | 0.04634400  | 5.37596200  | -0.74911900 |
| H | 1.16782500  | 4.68545300  | -1.93158800 |
| C | 1.49791600  | 4.84692700  | 1.58087400  |
| H | 2.36663500  | 4.95658200  | 2.24206500  |
| H | 0.89195800  | 5.75018300  | 1.72503700  |
| C | 0.75185400  | 3.64490300  | 1.97575400  |
| C | 0.16557400  | 2.56265600  | 1.99564300  |
| C | -0.27100800 | 1.20501800  | 1.86516400  |
| C | -1.57209200 | 0.79155000  | 2.20883300  |
| C | 0.65070300  | 0.26929100  | 1.34996100  |
| C | -1.93938900 | -0.54216600 | 2.04485100  |
| H | -2.28548200 | 1.51538600  | 2.58726900  |
| C | 0.26614300  | -1.05836600 | 1.18400900  |
| H | 1.64537300  | 0.60536800  | 1.07642200  |
| C | -1.02412000 | -1.46730900 | 1.53431500  |
| H | -2.94494900 | -0.85889100 | 2.30628700  |

|   |             |             |            |
|---|-------------|-------------|------------|
| H | 0.97520200  | -1.77605600 | 0.78209100 |
| H | -1.31768900 | -2.50515300 | 1.40501600 |

#### 4a-ts

B3LYP SCF energy: -2644.611774 a.u.

B3LYP enthalpy: -2643.799353 a.u.

B3LYP free energy: -2643.936437 a.u.

M06 SCF energy in solution: -2643.789107 a.u.

Imaginary frequency: -277.99 cm<sup>-1</sup>

#### Cartesian coordinates

| ATOM | X           | Y           | Z           |
|------|-------------|-------------|-------------|
| Ni   | 0.26402500  | -0.03632100 | -0.04450600 |
| C    | -3.83270700 | 2.00425600  | 0.56904900  |
| C    | -2.77758700 | 1.39800900  | -0.12526300 |
| C    | -2.35909800 | 1.98439000  | -1.34343900 |
| C    | -2.99419700 | 3.14121200  | -1.82467600 |
| C    | -4.02714300 | 3.73696300  | -1.10585000 |
| C    | -4.44903500 | 3.16361600  | 0.09199300  |
| H    | -4.18010100 | 1.56655300  | 1.49780900  |
| H    | -2.66982500 | 3.56820200  | -2.76669200 |
| H    | -4.50221300 | 4.63635700  | -1.48530100 |
| H    | -5.26130800 | 3.61033200  | 0.65790200  |
| C    | -1.29611800 | 1.40789600  | -2.18478400 |
| O    | -1.39787100 | 1.68285600  | -3.49569600 |
| C    | -0.24587800 | 1.10083800  | -4.15786200 |
| C    | 0.44926700  | 0.26307900  | -3.04963100 |
| H    | -0.61017400 | 0.50143700  | -4.99285100 |
| H    | 0.37277900  | 1.92149400  | -4.53135200 |
| H    | 1.49064400  | 0.57481400  | -2.94206200 |
| N    | -0.29107200 | 0.67689900  | -1.82316300 |
| P    | -2.00429400 | -0.15611500 | 0.53302300  |
| C    | -2.43370900 | -0.08627700 | 2.31887000  |
| C    | -3.27979300 | -1.01850500 | 2.93473000  |
| C    | -1.88131300 | 0.95581000  | 3.08596200  |
| C    | -3.56919800 | -0.91174600 | 4.29758400  |
| H    | -3.72122600 | -1.82414000 | 2.35788900  |
| C    | -2.18707300 | 1.06459900  | 4.44163600  |
| H    | -1.22412900 | 1.68659900  | 2.62313400  |
| C    | -3.02731800 | 0.12898800  | 5.05181100  |
| H    | -4.22677700 | -1.63973200 | 4.76414600  |
| H    | -1.76516400 | 1.87932400  | 5.02379300  |
| H    | -3.26037900 | 0.21386100  | 6.10946100  |
| C    | -3.03916700 | -1.50314100 | -0.18034800 |
| C    | -2.66379200 | -2.83400800 | 0.07728500  |
| C    | -4.15979200 | -1.25627900 | -0.98851800 |
| C    | -3.40437700 | -3.89163000 | -0.45063600 |
| H    | -1.79963900 | -3.04321100 | 0.70016000  |
| C    | -4.88884600 | -2.31914400 | -1.52755700 |
| H    | -4.47344100 | -0.23847600 | -1.19537400 |
| C    | -4.51608300 | -3.63690900 | -1.25824500 |
| H    | -3.11078600 | -4.91474600 | -0.23303400 |
| H    | -5.75428700 | -2.11360300 | -2.15111200 |
| H    | -5.09026400 | -4.46106200 | -1.67174200 |
| C    | 0.42949600  | -1.23468000 | -3.29953000 |
| C    | -0.74375100 | -1.98855200 | -3.16713500 |
| C    | 1.59685300  | -1.86692800 | -3.74678600 |
| C    | -0.74373300 | -3.35162600 | -3.46711800 |
| H    | -1.66094200 | -1.51919800 | -2.82431000 |
| C    | 1.59605600  | -3.22859400 | -4.05444500 |
| H    | 2.51009000  | -1.28755800 | -3.86738200 |
| C    | 0.42487900  | -3.97470800 | -3.91146400 |

|   |             |             |             |
|---|-------------|-------------|-------------|
| H | -1.65963600 | -3.92372800 | -3.35276100 |
| H | 2.50771700  | -3.70429200 | -4.40445500 |
| H | 0.42184300  | -5.03468200 | -4.14864000 |
| C | 0.73767900  | -2.52476200 | 1.40688700  |
| C | 0.88770600  | -1.12489200 | 1.47927000  |
| C | 1.02622600  | -0.52422300 | 2.74147500  |
| C | 0.95992000  | -1.29513800 | 3.90762800  |
| C | 0.78631700  | -2.67724600 | 3.82443400  |
| C | 0.68079000  | -3.29141600 | 2.56921600  |
| H | 0.68171800  | -3.01563000 | 0.43807100  |
| H | 1.17815100  | 0.54865100  | 2.80871800  |
| H | 1.04938900  | -0.81454100 | 4.87830700  |
| H | 0.74777300  | -3.27817000 | 4.72861000  |
| H | 0.56446700  | -4.37013000 | 2.50066500  |
| C | 2.69212500  | 5.52243400  | 0.34209500  |
| C | 1.56004900  | 4.97328400  | 1.23194400  |
| C | 1.53290900  | 3.45657000  | 1.01623400  |
| C | 2.77886000  | 3.01201600  | 0.24882900  |
| C | 3.25301700  | 4.31698100  | -0.41909700 |
| H | 2.36371900  | 6.27920500  | -0.37645100 |
| H | 3.50296800  | 5.97728400  | 0.92368000  |
| H | 0.57368500  | 5.37879100  | 0.98317700  |
| H | 1.71548300  | 5.17555200  | 2.29841500  |
| O | 3.95194600  | 4.36643500  | -1.40493400 |
| O | 0.63910400  | 2.72485700  | 1.39778300  |
| C | 3.86760800  | 2.59824400  | 1.27710800  |
| H | 3.55399200  | 1.69910500  | 1.81379600  |
| H | 4.80551700  | 2.39191800  | 0.75119500  |
| H | 4.05731400  | 3.38864000  | 2.01153800  |
| C | 2.53590700  | 1.91700600  | -0.81839700 |
| H | 1.80247000  | 2.29952100  | -1.53485000 |
| H | 3.48084500  | 1.79582500  | -1.36429200 |
| C | 2.08916900  | 0.60951100  | -0.26378400 |
| C | 2.48278500  | -0.45914000 | 0.29709800  |
| C | 3.54671700  | -1.43705400 | 0.47231900  |
| C | 4.20090200  | -1.90709500 | -0.68282100 |
| C | 3.99734200  | -1.85730000 | 1.73600700  |
| C | 5.29172200  | -2.76718700 | -0.57232100 |
| H | 3.84144400  | -1.59816200 | -1.65890900 |
| C | 5.09169300  | -2.71163100 | 1.83775100  |
| H | 3.48796300  | -1.51264400 | 2.62871400  |
| C | 5.74072400  | -3.16949400 | 0.68711900  |
| H | 5.78935600  | -3.12403400 | -1.46943700 |
| H | 5.43879900  | -3.02412700 | 2.81831500  |
| H | 6.59059100  | -3.84045600 | 0.77279500  |

#### 5a

B3LYP SCF energy: -2644.669280 a.u.

B3LYP enthalpy: -2643.854347 a.u.

B3LYP free energy: -2643.989467 a.u.

M06 SCF energy in solution: -2643.842662 a.u.

#### Cartesian coordinates

| ATOM | X           | Y          | Z           |
|------|-------------|------------|-------------|
| Ni   | 0.36802900  | 0.87839100 | 0.23508300  |
| C    | -2.65781600 | 4.25958300 | 0.21101500  |
| C    | -1.81572500 | 3.28756900 | -0.33893400 |
| C    | -0.91413000 | 3.67678800 | -1.36040300 |
| C    | -0.89386700 | 5.00855100 | -1.80532900 |
| C    | -1.73515500 | 5.96271600 | -1.23620200 |
| C    | -2.61795400 | 5.58709700 | -0.22607400 |
| H    | -3.35503600 | 3.97911100 | 0.99313100  |



|   |             |             |             |
|---|-------------|-------------|-------------|
| H | -0.21177900 | 5.28972500  | -2.59953600 |
| H | -1.70141600 | 6.98996900  | -1.58570700 |
| H | -3.28205700 | 6.32022200  | 0.22248500  |
| C | 0.00728300  | 2.73413000  | -2.02305500 |
| O | 0.38419700  | 3.08374300  | -3.26499800 |
| C | 1.40175000  | 2.13734400  | -3.69101100 |
| C | 1.28655300  | 0.97936200  | -2.67303000 |
| H | 1.17862700  | 1.84921500  | -4.71779200 |
| H | 2.36712000  | 2.65061300  | -3.64823000 |
| H | 2.26688500  | 0.71401100  | -2.27640200 |
| N | 0.50278000  | 1.62390000  | -1.57107300 |
| P | -1.88419900 | 1.53252900  | 0.23875300  |
| C | -2.77852400 | 1.60772000  | 1.84382400  |
| C | -4.08103400 | 1.11012700  | 2.00245900  |
| C | -2.10178300 | 2.13520000  | 2.95972200  |
| C | -4.69744400 | 1.14273700  | 3.25605900  |
| H | -4.61562100 | 0.69743800  | 1.15329400  |
| C | -2.72711800 | 2.17141600  | 4.20562700  |
| H | -1.09531300 | 2.52715900  | 2.84690500  |
| C | -4.02404500 | 1.67241700  | 4.35746800  |
| H | -5.70582900 | 0.75461200  | 3.36791500  |
| H | -2.19981100 | 2.58584100  | 5.06039700  |
| H | -4.50626900 | 1.69629400  | 5.33046200  |
| C | -3.03924900 | 0.70988800  | -0.92713100 |
| C | -2.93001500 | -0.67968400 | -1.09612400 |
| C | -4.04332000 | 1.40954500  | -1.61680600 |
| C | -3.82304100 | -1.35904000 | -1.92590500 |
| H | -2.14894800 | -1.23029600 | -0.58061100 |
| C | -4.92614300 | 0.72689100  | -2.45473400 |
| H | -4.14130300 | 2.48463100  | -1.50024500 |
| C | -4.82072300 | -0.65794400 | -2.60605300 |
| H | -3.73153800 | -2.43440600 | -2.04728500 |
| H | -5.69894300 | 1.27660500  | -2.98449200 |
| H | -5.51338900 | -1.18754700 | -3.25405200 |
| C | 0.62743100  | -0.27524800 | -3.21692000 |
| C | -0.58011100 | -0.21121600 | -3.92719000 |
| C | 1.25953100  | -1.51449900 | -3.06215200 |
| C | -1.13885500 | -1.36439000 | -4.47625100 |
| H | -1.08793700 | 0.74135800  | -4.05980300 |
| C | 0.69984300  | -2.67074900 | -3.61022000 |
| H | 2.19894100  | -1.57546400 | -2.51847100 |
| C | -0.49888300 | -2.59715400 | -4.32044300 |
| H | -2.07193200 | -1.29948400 | -5.02806000 |
| H | 1.20657400  | -3.62420300 | -3.49111900 |
| H | -0.93009500 | -3.49363500 | -4.75687500 |
| C | 1.14635600  | -2.91036700 | 0.73131600  |
| C | 1.31798700  | -1.54926100 | 1.03653100  |
| C | 0.26346000  | -0.87070300 | 1.69934100  |
| C | -0.93206100 | -1.53612900 | 2.02615500  |
| C | -1.08235800 | -2.88134300 | 1.70708500  |
| C | -0.03769700 | -3.56309600 | 1.06340100  |
| H | 1.94602500  | -3.44948900 | 0.23326100  |
| H | 0.47299200  | 0.10216500  | 2.16809900  |
| H | -1.71470900 | -1.00565300 | 2.55969700  |
| H | -1.99228800 | -3.40943700 | 1.97625200  |
| H | -0.15201900 | -4.61710200 | 0.82487800  |
| C | 3.78743200  | 5.06195600  | 1.72953500  |
| C | 2.32356800  | 4.78117000  | 2.11743200  |
| C | 2.04490100  | 3.32671900  | 1.73437100  |
| C | 3.33310400  | 2.61699700  | 1.34549800  |
| C | 4.29155200  | 3.78504000  | 1.04613000  |
| H | 3.91053100  | 5.90956000  | 1.04915800  |
| H | 4.42153800  | 5.26647300  | 2.60039700  |

|   |            |             |             |
|---|------------|-------------|-------------|
| H | 1.60368200 | 5.41964400  | 1.59334600  |
| H | 2.12585500 | 4.91070500  | 3.18814800  |
| O | 5.28634400 | 3.69920700  | 0.36459100  |
| O | 0.92725500 | 2.83070100  | 1.74899100  |
| C | 3.87445700 | 1.89816100  | 2.61693600  |
| H | 3.20785600 | 1.07612700  | 2.89034000  |
| H | 4.86809100 | 1.49290400  | 2.40355800  |
| H | 3.95737500 | 2.57769500  | 3.47248500  |
| C | 3.23747600 | 1.64185100  | 0.13937700  |
| H | 2.98199400 | 2.23751700  | -0.74587300 |
| H | 4.25478100 | 1.26936000  | -0.02424900 |
| C | 2.24673800 | 0.52752400  | 0.33981700  |
| C | 2.51931100 | -0.75894300 | 0.66811100  |
| C | 3.86194500 | -1.40560700 | 0.73885600  |
| C | 4.77775400 | -1.30934300 | -0.32309300 |
| C | 4.23357100 | -2.15134700 | 1.87193500  |
| C | 6.02993600 | -1.92014600 | -0.24840500 |
| H | 4.50009400 | -0.76340400 | -1.22112600 |
| C | 5.48548500 | -2.76099500 | 1.94832200  |
| H | 3.53693400 | -2.24779700 | 2.70074600  |
| C | 6.38916400 | -2.64544300 | 0.88928900  |
| H | 6.72148300 | -1.83550300 | -1.08202100 |
| H | 5.75574900 | -3.32659700 | 2.83571400  |
| H | 7.36344900 | -3.12193200 | 0.94793700  |

#### OAc<sup>-</sup>

B3LYP SCF energy: -228.4931536 a.u.

B3LYP enthalpy: -228.4394566 a.u.

B3LYP free energy: -228.4736896 a.u.

M06 SCF energy in solution: -228.563056 a.u.

#### Cartesian coordinates

| ATOM | X           | Y           | Z           |
|------|-------------|-------------|-------------|
| C    | -1.61975400 | 0.04255100  | -0.00003900 |
| O    | -0.78018500 | -0.89240600 | -0.00038100 |
| C    | -3.13366800 | -0.39429900 | 0.00037100  |
| H    | -3.64637600 | 0.02115200  | -0.87990000 |
| H    | -3.25217900 | -1.48562600 | 0.00022000  |
| H    | -3.64579100 | 0.02084900  | 0.88112400  |
| O    | -1.44084700 | 1.28752200  | 0.00019800  |

#### 6-ts

B3LYP SCF energy: -2644.615102 a.u.

B3LYP enthalpy: -2643.801896 a.u.

B3LYP free energy: -2643.929917 a.u.

M06 SCF energy in solution: -2643.799703 a.u.

Imaginary frequency: -294.07 cm<sup>-1</sup>

#### Cartesian coordinates

| ATOM | X           | Y           | Z           |
|------|-------------|-------------|-------------|
| Ni   | 0.21292700  | -0.18623500 | -0.33545800 |
| C    | -3.27414900 | -2.01616600 | 2.03789000  |
| C    | -2.28492600 | -1.92702500 | 1.05097800  |
| C    | -1.56735000 | -3.09834400 | 0.70837100  |
| C    | -1.86519800 | -4.31312600 | 1.34664600  |
| C    | -2.84193600 | -4.37572700 | 2.33787300  |
| C    | -3.54608000 | -3.22484300 | 2.68450300  |
| H    | -3.84444300 | -1.13454800 | 2.30732400  |
| H    | -1.31994400 | -5.20571300 | 1.06302200  |
| H    | -3.05317900 | -5.32068000 | 2.82867400  |

|   |             |             |             |
|---|-------------|-------------|-------------|
| H | -4.31615100 | -3.26217000 | 3.44948700  |
| C | -0.49814200 | -3.12068200 | -0.30751400 |
| O | -0.24044100 | -4.32833700 | -0.83570800 |
| C | 0.73131700  | -4.12289500 | -1.89620600 |
| C | 1.31504500  | -2.72515300 | -1.58437600 |
| H | 0.18979100  | -4.16308600 | -2.84667800 |
| H | 1.46110900  | -4.93017300 | -1.84403200 |
| N | 0.25093000  | -2.14381800 | -0.71321900 |
| P | -1.99220000 | -0.36288100 | 0.10544000  |
| C | -2.90678300 | 0.92927000  | 1.03397400  |
| C | -3.88250000 | 1.72582000  | 0.41778600  |
| C | -2.58191000 | 1.17200200  | 2.38131900  |
| C | -4.53164100 | 2.73021600  | 1.13876000  |
| H | -4.13629200 | 1.57223500  | -0.62456800 |
| C | -3.23843100 | 2.17041400  | 3.09893600  |
| H | -1.82624300 | 0.57531900  | 2.88320800  |
| C | -4.21712400 | 2.95136300  | 2.47907600  |
| H | -5.28491600 | 3.33850800  | 0.64688400  |
| H | -2.98513500 | 2.33737400  | 4.14197900  |
| H | -4.72832900 | 3.72929500  | 3.03869600  |
| C | -2.94278400 | -0.68255300 | -1.43986200 |
| C | -2.29222800 | -0.63926100 | -2.68194700 |
| C | -4.30510500 | -1.02560100 | -1.39333800 |
| C | -2.99291800 | -0.91564000 | -3.85801500 |
| H | -1.23438900 | -0.39763100 | -2.72783500 |
| C | -5.00274700 | -1.29840200 | -2.56908600 |
| H | -4.82222300 | -1.08064100 | -0.43991000 |
| C | -4.34848900 | -1.24179400 | -3.80298400 |
| H | -2.47950700 | -0.87531800 | -4.81454800 |
| H | -6.05598600 | -1.55931800 | -2.52193800 |
| H | -4.89423900 | -1.45594700 | -4.71729400 |
| C | 0.99823200  | 0.09313300  | 2.55077200  |
| C | 1.82791100  | 1.18492700  | 2.18914900  |
| C | 2.92529400  | 1.46959900  | 3.04844300  |
| C | 3.17688000  | 0.70216000  | 4.17701600  |
| C | 2.35254700  | -0.38472000 | 4.48980900  |
| C | 1.26204300  | -0.68688700 | 3.66929800  |
| H | 0.13175100  | -0.12370400 | 1.93992600  |
| H | 3.58909500  | 2.29619000  | 2.83321500  |
| H | 4.01983500  | 0.94701000  | 4.81581800  |
| H | 2.55229900  | -0.98234200 | 5.37463000  |
| H | 0.60821600  | -1.51905400 | 3.91397200  |
| C | 3.15884700  | 2.52387300  | -2.97322900 |
| C | 1.78121900  | 1.97781200  | -2.56281500 |
| C | 2.00615800  | 1.37945600  | -1.14588600 |
| C | 3.21259600  | 2.19621200  | -0.51869500 |
| C | 3.74185200  | 3.06702500  | -1.67067700 |
| H | 3.12438600  | 3.30263700  | -3.73888900 |
| H | 3.81481800  | 1.71889800  | -3.33265300 |
| H | 1.06669700  | 2.80199000  | -2.55264900 |
| H | 1.39859100  | 1.19795800  | -3.22628000 |
| O | 4.47173700  | 4.02136800  | -1.54067300 |
| O | 1.96669000  | 0.06252200  | -1.03160700 |
| C | 4.36382600  | 1.30103800  | -0.03520000 |
| H | 4.02582500  | 0.55884200  | 0.68998100  |
| H | 5.14933800  | 1.92372400  | 0.40640700  |
| H | 4.80185400  | 0.74652200  | -0.87110200 |
| C | 2.52521400  | 3.05441900  | 0.58710800  |
| H | 2.02901300  | 3.91345600  | 0.13131800  |
| H | 3.22084600  | 3.43196500  | 1.33465800  |
| C | 1.51529000  | 2.01829800  | 1.04397500  |
| C | 0.53879400  | 1.71494200  | 0.03069500  |
| C | -0.37627900 | 2.80219900  | -0.41384800 |

|   |             |             |             |
|---|-------------|-------------|-------------|
| C | -0.61063300 | 3.93021600  | 0.40253700  |
| C | -1.10537300 | 2.72448800  | -1.61802100 |
| C | -1.47574700 | 4.94892500  | 0.00748700  |
| H | -0.12080700 | 4.00037600  | 1.36974100  |
| C | -1.97271200 | 3.74133900  | -2.01427600 |
| H | -0.99283100 | 1.85229100  | -2.25234300 |
| C | -2.15495600 | 4.86779300  | -1.20957100 |
| H | -1.62646100 | 5.80414300  | 0.66054400  |
| H | -2.50900000 | 3.65026500  | -2.95517200 |
| H | -2.82845900 | 5.66192400  | -1.51810400 |
| H | 1.40121000  | -2.11819700 | -2.48681100 |
| C | 2.67476400  | -2.80014000 | -0.90635900 |
| C | 3.82645400  | -2.60811400 | -1.67894500 |
| C | 2.81377300  | -3.15011800 | 0.44132600  |
| C | 5.09422100  | -2.76195000 | -1.11796500 |
| H | 3.73089600  | -2.33213700 | -2.72665500 |
| C | 4.08199900  | -3.29789000 | 1.00678000  |
| H | 1.93434100  | -3.30155400 | 1.06120200  |
| C | 5.22547500  | -3.10541000 | 0.22955100  |
| H | 5.97815800  | -2.61179000 | -1.73155000 |
| H | 4.17539600  | -3.56810900 | 2.05506400  |
| H | 6.21153600  | -3.22453800 | 0.66929600  |

### 7(S)-ts

B3LYP SCF energy: -2644.648289 a.u.

B3LYP enthalpy: -2643.835600 a.u.

B3LYP free energy: -2643.974713 a.u.

M06 SCF energy in solution: -2643.81171 a.u.

Imaginary frequency: -38.06 cm<sup>-1</sup>

### Cartesian coordinates

| ATOM | X           | Y           | Z           |
|------|-------------|-------------|-------------|
| Ni   | 0.16890800  | 0.14488900  | -0.48036900 |
| C    | 2.96652500  | -3.29173300 | -1.33539300 |
| C    | 2.59195800  | -1.94572500 | -1.24860200 |
| C    | 2.81438400  | -1.10932300 | -2.37469500 |
| C    | 3.42708200  | -1.63973100 | -3.52171800 |
| C    | 3.78951800  | -2.98355200 | -3.58568800 |
| C    | 3.55323100  | -3.81254500 | -2.49213700 |
| H    | 2.80355600  | -3.94533000 | -0.48528000 |
| H    | 3.60811500  | -0.98952000 | -4.36948900 |
| H    | 4.25281300  | -3.37530700 | -4.48589600 |
| H    | 3.83011000  | -4.86217600 | -2.52810900 |
| C    | 2.42769300  | 0.31710700  | -2.43415600 |
| O    | 3.08957200  | 1.05101000  | -3.34533000 |
| C    | 2.61439800  | 2.41865400  | -3.23839000 |
| C    | 1.43114300  | 2.33898000  | -2.23812700 |
| H    | 3.44272500  | 3.02926200  | -2.87099000 |
| H    | 2.32574400  | 2.75216400  | -4.23650500 |
| H    | 0.47696300  | 2.43661300  | -2.76615900 |
| N    | 1.51313100  | 0.93334700  | -1.75609500 |
| P    | 1.83575000  | -1.28079800 | 0.30547900  |
| C    | 1.44459400  | -2.75079300 | 1.33284000  |
| C    | 2.35970700  | -3.32479800 | 2.23049300  |
| C    | 0.15659300  | -3.30220700 | 1.22448300  |
| C    | 1.99331800  | -4.43547300 | 2.99243800  |
| H    | 3.35395000  | -2.90295600 | 2.33981100  |
| C    | -0.20432700 | -4.41639400 | 1.98215900  |
| H    | -0.56666000 | -2.85357100 | 0.54829200  |
| C    | 0.71460500  | -4.98359000 | 2.86802700  |
| H    | 2.70729000  | -4.87075800 | 3.68576000  |
| H    | -1.20264700 | -4.83424000 | 1.88874500  |

|   |             |             |             |
|---|-------------|-------------|-------------|
| H | 0.43270000  | -5.84631000 | 3.46466500  |
| C | 3.24387000  | -0.45368000 | 1.15467600  |
| C | 2.95751200  | 0.54360400  | 2.10164800  |
| C | 4.58322100  | -0.79866900 | 0.90954700  |
| C | 3.99014000  | 1.16736100  | 2.80330100  |
| H | 1.92952900  | 0.83961700  | 2.28975500  |
| C | 5.61370500  | -0.16358800 | 1.60577300  |
| H | 4.82615500  | -1.56209100 | 0.17665400  |
| C | 5.31913400  | 0.81653900  | 2.55579400  |
| H | 3.75490600  | 1.93208700  | 3.53819700  |
| H | 6.64577000  | -0.43809800 | 1.40694600  |
| H | 6.12235900  | 1.30634300  | 3.09880200  |
| C | 1.47681700  | 3.37023300  | -1.12882200 |
| C | 2.52424600  | 3.38302500  | -0.19693400 |
| C | 0.48448600  | 4.35400600  | -1.05062300 |
| C | 2.57450300  | 4.36311000  | 0.79359200  |
| H | 3.29986800  | 2.62278200  | -0.23854300 |
| C | 0.53631100  | 5.33888600  | -0.06173700 |
| H | -0.33007200 | 4.35610500  | -1.77157100 |
| C | 1.58177900  | 5.34460500  | 0.86241600  |
| H | 3.39125300  | 4.36175300  | 1.50976800  |
| H | -0.23718700 | 6.10016000  | -0.01692900 |
| H | 1.62559300  | 6.11107400  | 1.63084800  |
| C | -2.06519500 | 1.01230200  | -2.54833100 |
| C | -2.00483600 | -0.17508400 | -1.79225800 |
| C | -1.75648800 | -1.39131300 | -2.45938800 |
| C | -1.55115000 | -1.41439800 | -3.83865900 |
| C | -1.60893200 | -0.22898400 | -4.57760400 |
| C | -1.87219000 | 0.98122100  | -3.93062100 |
| H | -2.31914400 | 1.93865000  | -2.04354200 |
| H | -1.72484900 | -2.32028300 | -1.89634600 |
| H | -1.35670700 | -2.35914900 | -4.33818600 |
| H | -1.46808700 | -0.25236100 | -5.65440900 |
| H | -1.95071500 | 1.89984300  | -4.50591500 |
| C | -6.86461900 | -0.56625400 | 1.38700600  |
| C | -6.33944100 | 0.87014500  | 1.22575900  |
| C | -5.19185900 | 0.79492400  | 0.21583200  |
| C | -4.81931600 | -0.66553400 | -0.07309800 |
| C | -5.75174200 | -1.47205300 | 0.85275700  |
| H | -7.12183200 | -0.85010200 | 2.41073600  |
| H | -7.76080800 | -0.73652300 | 0.77525000  |
| H | -5.91903300 | 1.25448100  | 2.16538400  |
| H | -7.08659300 | 1.59803200  | 0.89626800  |
| O | -5.60632700 | -2.64521200 | 1.11257500  |
| O | -4.65142300 | 1.75514600  | -0.29521900 |
| C | -5.19691300 | -0.99990100 | -1.53784200 |
| H | -4.65671900 | -0.35617800 | -2.23472700 |
| H | -4.96279000 | -2.04757100 | -1.75100900 |
| H | -6.26953300 | -0.85359200 | -1.70986900 |
| C | -3.34266000 | -1.01012600 | 0.28997800  |
| H | -3.23681500 | -0.98301600 | 1.37853800  |
| H | -3.18593400 | -2.05407700 | -0.00832000 |
| C | -2.26231400 | -0.11771000 | -0.31366100 |
| C | -1.50552800 | 0.68828700  | 0.46456300  |
| C | -1.59159300 | 1.24399300  | 1.78747300  |
| C | -0.85909800 | 0.69704500  | 2.87055200  |
| C | -2.39697600 | 2.38668900  | 2.02563300  |
| C | -0.94636800 | 1.25819600  | 4.14011200  |
| H | -0.25731200 | -0.19174600 | 2.70703500  |
| C | -2.46201700 | 2.94855100  | 3.29615400  |
| H | -2.96679800 | 2.81017600  | 1.20562600  |
| C | -1.74005700 | 2.39018300  | 4.35755400  |
| H | -0.39904600 | 0.81105700  | 4.96519400  |

|   |             |            |            |
|---|-------------|------------|------------|
| H | -3.08271700 | 3.82428800 | 3.46380200 |
| H | -1.79968900 | 2.83085700 | 5.34842700 |

### 7-ts

B3LYP SCF energy: -2644.645391 a.u.

B3LYP enthalpy: -2643.831659 a.u.

B3LYP free energy: -2643.966276 a.u.

M06 SCF energy in solution: -2643.815157 a.u.

Imaginary frequency: -23.73 cm<sup>-1</sup>

### Cartesian coordinates

| ATOM | X           | Y           | Z           |
|------|-------------|-------------|-------------|
| Ni   | 0.08733900  | 0.24646300  | -0.24734700 |
| C    | 2.68652500  | -3.56327500 | -1.06668600 |
| C    | 2.30794500  | -2.21514900 | -1.05173800 |
| C    | 2.62171000  | -1.41340100 | -2.18174900 |
| C    | 3.30022800  | -1.99127700 | -3.26933100 |
| C    | 3.65772300  | -3.33724000 | -3.26429100 |
| C    | 3.35111300  | -4.12591200 | -2.15890400 |
| H    | 2.45692900  | -4.18763800 | -0.21065200 |
| H    | 3.54212100  | -1.37355600 | -4.12525200 |
| H    | 4.17377700  | -3.76108600 | -4.12017800 |
| H    | 3.62602100  | -5.17638800 | -2.13798700 |
| C    | 2.29369600  | 0.02363100  | -2.30310500 |
| O    | 2.92426300  | 0.65746200  | -3.30854100 |
| C    | 2.46446200  | 2.03154300  | -3.33388000 |
| C    | 1.49457200  | 2.13309100  | -2.12341400 |
| H    | 3.34035800  | 2.67625500  | -3.24233100 |
| H    | 1.97695500  | 2.20189400  | -4.29659200 |
| H    | 0.48092300  | 2.36723700  | -2.46243600 |
| N    | 1.48035600  | 0.74313600  | -1.59686500 |
| P    | 1.40456900  | -1.54030400 | 0.41366400  |
| C    | 0.86850900  | -3.02165400 | 1.36223000  |
| C    | 1.60630200  | -3.52598100 | 2.44636100  |
| C    | -0.32533000 | -3.66375200 | 0.99316500  |
| C    | 1.15352000  | -4.64822300 | 3.14280000  |
| H    | 2.53079200  | -3.04586500 | 2.75002100  |
| C    | -0.77405700 | -4.78542900 | 1.68990700  |
| H    | -0.91569600 | -3.29553200 | 0.16128900  |
| C    | -0.03505800 | -5.27827400 | 2.76794900  |
| H    | 1.73194100  | -5.02848000 | 3.98003700  |
| H    | -1.70621900 | -5.25620700 | 1.39268700  |
| H    | -0.38525100 | -6.14827000 | 3.31614400  |
| C    | 2.71340300  | -0.77179300 | 1.45654800  |
| C    | 2.30143600  | -0.06897400 | 2.60303800  |
| C    | 4.08111300  | -0.83767000 | 1.15297200  |
| C    | 3.23976300  | 0.54711000  | 3.43081300  |
| H    | 1.24549800  | -0.01197800 | 2.85560900  |
| C    | 5.01729500  | -0.20936600 | 1.97899000  |
| H    | 4.42325100  | -1.38589100 | 0.28075700  |
| C    | 4.60015900  | 0.48202900  | 3.11778700  |
| H    | 2.90839000  | 1.07751500  | 4.31910900  |
| H    | 6.07427900  | -0.27156500 | 1.73566900  |
| H    | 5.33134300  | 0.96170700  | 3.76214600  |
| C    | 1.91542200  | 3.16172200  | -1.08978300 |
| C    | 2.99652000  | 2.92967900  | -0.22784300 |
| C    | 1.25847900  | 4.39703000  | -1.03988900 |
| C    | 3.40913400  | 3.91755900  | 0.66745400  |
| H    | 3.51419400  | 1.97448100  | -0.24639900 |
| C    | 1.67610800  | 5.38884300  | -0.15036000 |
| H    | 0.41696400  | 4.58591600  | -1.70267500 |
| C    | 2.75274000  | 5.15080500  | 0.70564000  |

|   |             |             |             |   |             |             |             |
|---|-------------|-------------|-------------|---|-------------|-------------|-------------|
| H | 4.24614000  | 3.72307600  | 1.33205600  | H | 1.50800800  | 12.19717700 | 0.20044600  |
| H | 1.15933100  | 6.34396000  | -0.12571800 | H | -0.63755500 | 13.36497900 | -0.21716900 |
| H | 3.08073600  | 5.92217400  | 1.39672000  | H | -2.71679400 | 12.03079700 | -0.55752800 |
| C | -2.49269500 | 2.07231700  | -2.25185200 | C | 1.95991400  | 9.61916400  | 0.41613900  |
| C | -2.19745400 | 0.73809700  | -1.91507600 | O | 3.04009200  | 10.39276300 | 0.22085600  |
| C | -2.06120800 | -0.20159900 | -2.95352300 | C | 4.21031800  | 9.56177400  | 0.45836400  |
| C | -2.21732800 | 0.18124700  | -4.28554800 | C | 3.64090200  | 8.30578300  | 1.15930400  |
| C | -2.52058000 | 1.50691200  | -4.60621200 | H | 4.65961400  | 9.33573900  | -0.51283500 |
| C | -2.66014100 | 2.45004500  | -3.58403700 | H | 4.91074800  | 10.13271300 | 1.06832900  |
| H | -2.61386000 | 2.80720500  | -1.46124300 | H | 3.77824300  | 8.38752500  | 2.24512700  |
| H | -1.82267600 | -1.23559900 | -2.72121400 | N | 2.18089700  | 8.43666400  | 0.89135300  |
| H | -2.10717100 | -0.55844700 | -5.07364000 | P | -0.49416900 | 7.60648800  | -0.16490800 |
| H | -2.65400200 | 1.80120800  | -5.64315700 | C | -2.25379300 | 7.12618000  | -0.02907800 |
| H | -2.90988600 | 3.48000000  | -3.82340900 | C | -2.97079900 | 6.63079500  | -1.12750400 |
| C | -5.61527900 | -2.66153100 | 1.46623400  | C | -2.89479600 | 7.27559700  | 1.21372800  |
| C | -5.77573600 | -1.21587300 | 1.96510100  | C | -4.31739100 | 6.28797700  | -0.98482400 |
| C | -4.99708200 | -0.33424400 | 0.98445900  | H | -2.48575900 | 6.50729400  | -2.08986100 |
| C | -4.17974900 | -1.19221700 | 0.01040800  | C | -4.24140300 | 6.93904300  | 1.34388500  |
| C | -4.41918100 | -2.63172000 | 0.51554300  | H | -2.34178400 | 7.64967800  | 2.06925100  |
| H | -5.45341600 | -3.40436700 | 2.25168100  | C | -4.95351700 | 6.44151200  | 0.24756700  |
| H | -6.49421600 | -2.98951200 | 0.89500400  | H | -4.86597800 | 5.90167600  | -1.83892400 |
| H | -5.32819700 | -1.07888300 | 2.95882100  | H | -4.73531700 | 7.06070200  | 2.30382300  |
| H | -6.81047500 | -0.86923000 | 2.03970000  | H | -6.00122200 | 6.17555000  | 0.35539400  |
| O | -3.74119900 | -3.58801200 | 0.20455800  | C | 0.02745300  | 7.23207400  | -1.88838300 |
| O | -5.05529900 | 0.87702700  | 0.95628900  | C | 0.43295800  | 5.92211700  | -2.19752100 |
| C | -4.84930300 | -1.06727200 | -1.38234700 | C | 0.01554200  | 8.20538200  | -2.90117900 |
| H | -4.81372300 | -0.03260900 | -1.72912500 | C | 0.81199400  | 5.59505600  | -3.49978400 |
| H | -4.34403500 | -1.71088800 | -2.10738500 | H | 0.44620900  | 5.15588400  | -1.42947900 |
| H | -5.90182200 | -1.37062300 | -1.33659000 | C | 0.40570000  | 7.87216800  | -4.19968400 |
| C | -2.63894600 | -0.95091100 | 0.03082700  | H | -0.30023400 | 9.22087900  | -2.68643700 |
| H | -2.28233400 | -1.11345000 | 1.05254000  | C | 0.80318500  | 6.56843600  | -4.50168200 |
| H | -2.22891400 | -1.77900700 | -0.55906300 | H | 1.11375700  | 4.57693300  | -3.72866400 |
| C | -2.01222100 | 0.34873700  | -0.48106100 | H | 0.39361200  | 8.63294000  | -4.97489200 |
| C | -1.29419700 | 1.19292300  | 0.36092600  | H | 1.10267800  | 6.31187400  | -5.51379800 |
| C | -1.41958100 | 2.22145700  | 1.34638000  | C | 4.22616300  | 6.98627500  | 0.70029800  |
| C | -0.27414300 | 2.73138100  | 2.01033700  | C | 3.97594900  | 6.49492100  | -0.58973300 |
| C | -2.68750100 | 2.77936000  | 1.65112300  | C | 5.05375900  | 6.25540800  | 1.56173300  |
| C | -0.39774800 | 3.74307900  | 2.95147800  | C | 4.54487500  | 5.29133400  | -1.00631000 |
| H | 0.70464900  | 2.33382700  | 1.76336400  | H | 3.33069200  | 7.04717400  | -1.26787800 |
| C | -2.79710400 | 3.79619900  | 2.59399700  | C | 5.62803700  | 5.05380000  | 1.14175700  |
| H | -3.56837800 | 2.39373500  | 1.15233100  | H | 5.25621600  | 6.62949000  | 2.56300800  |
| C | -1.65879900 | 4.27756900  | 3.24757500  | C | 5.37310100  | 4.56928200  | -0.14239500 |
| H | 0.48715800  | 4.12812400  | 3.44911900  | H | 4.34296900  | 4.91980500  | -2.00682200 |
| H | -3.77386800 | 4.21282000  | 2.82177200  | H | 6.27370200  | 4.49951400  | 1.81663300  |
| H | -1.75091700 | 5.07179600  | 3.98312200  | H | 5.81977900  | 3.63508600  | -0.47017000 |

### 8E

B3LYP SCF energy: -2644.663538 a.u.

B3LYP enthalpy: -2643.848318 a.u.

B3LYP free energy: -2643.985471 a.u.

M06 SCF energy in solution: -2643.836419 a.u.

### Cartesian coordinates

| ATOM | X           | Y           | Z           |   |             |            |            |
|------|-------------|-------------|-------------|---|-------------|------------|------------|
| Ni   | 0.98105600  | 6.92925000  | 1.30654400  | H | 1.25934800  | 0.41407700 | 5.71372800 |
| C    | -1.71868600 | 10.13779700 | -0.33558600 | H | -0.94071700 | 1.18294800 | 4.83944500 |
| C    | -0.51845900 | 9.45808300  | -0.09538100 | C | 1.01415000  | 8.99358900 | 6.58887100 |
| C    | 0.65544200  | 10.22474600 | 0.11154500  | C | -0.27290600 | 9.18706900 | 5.75719000 |
| C    | 0.59900900  | 11.62610700 | 0.05076800  | C | -0.19241000 | 8.15112900 | 4.63268100 |
| C    | -0.60824700 | 12.28037600 | -0.18329400 | C | 0.76302700  | 7.02944200 | 5.03978900 |
| C    | -1.76892000 | 11.53411200 | -0.37261700 | C | 1.73661600  | 7.79497100 | 5.96348500 |
| H    | -2.62850000 | 9.57303300  | -0.50239200 | H | 1.68166700  | 9.86043600 | 6.56393200 |
|      |             |             |             | H | 0.81478200  | 8.78491200 | 7.64611700 |

|   |             |             |             |
|---|-------------|-------------|-------------|
| H | -0.37533700 | 10.18494300 | 5.32158300  |
| H | -1.18048800 | 9.00408500  | 6.34538700  |
| O | 2.89902800  | 7.50643200  | 6.13496700  |
| O | -0.74856400 | 8.25234000  | 3.55651900  |
| C | -0.01866100 | 6.04020400  | 5.95517300  |
| H | -0.81105600 | 5.54533800  | 5.38873300  |
| H | 0.66087300  | 5.27763800  | 6.34378800  |
| H | -0.47594800 | 6.55755800  | 6.80518600  |
| C | 1.51282700  | 6.35420900  | 3.86890000  |
| H | 1.76652100  | 7.17280200  | 3.16798500  |
| H | 2.48165400  | 6.03802800  | 4.27063400  |
| C | 0.86048200  | 5.16033800  | 3.15577300  |
| C | 0.33887900  | 5.28189400  | 1.91031600  |
| C | -0.17799300 | 4.17820000  | 1.07680000  |
| C | -1.55267100 | 3.93170400  | 0.91180700  |
| C | 0.73555800  | 3.33883000  | 0.40597500  |
| C | -1.99789400 | 2.88159200  | 0.10796600  |
| H | -2.27273100 | 4.56051500  | 1.42504400  |
| C | 0.28678800  | 2.28709900  | -0.39257000 |
| H | 1.80154700  | 3.50994400  | 0.53005100  |
| C | -1.08253500 | 2.05606600  | -0.54829800 |
| H | -3.06463600 | 2.70532400  | 0.00029000  |
| H | 1.00796500  | 1.64143600  | -0.88679000 |
| H | -1.43194300 | 1.23571600  | -1.16874600 |

9

B3LYP SCF energy: -2644.692818 a.u.

B3LYP enthalpy: -2643.877357 a.u.

B3LYP free energy: -2644.010995 a.u.

M06 SCF energy in solution: -2643.872704 a.u.

Cartesian coordinates

| ATOM | X           | Y           | Z           |
|------|-------------|-------------|-------------|
| Ni   | 0.01403300  | -0.19696700 | 0.66524000  |
| C    | -3.12418200 | -2.93046000 | -0.98448700 |
| C    | -2.57890400 | -1.99940600 | -0.09288400 |
| C    | -2.76878300 | -2.20804600 | 1.29617800  |
| C    | -3.49740500 | -3.31957400 | 1.74552600  |
| C    | -4.02028100 | -4.24100500 | 0.83993600  |
| C    | -3.83215800 | -4.04565900 | -0.52614500 |
| H    | -3.00040500 | -2.78564200 | -2.05146000 |
| H    | -3.64584900 | -3.45750400 | 2.81036200  |
| H    | -4.57321300 | -5.10162500 | 1.20323400  |
| H    | -4.23933900 | -4.75284900 | -1.24270300 |
| C    | -2.23921900 | -1.28547200 | 2.31564100  |
| O    | -2.83818700 | -1.33346200 | 3.51582800  |
| C    | -2.19660400 | -0.34539400 | 4.36629300  |
| C    | -1.07020000 | 0.25915000  | 3.48367300  |
| H    | -2.95506300 | 0.38523600  | 4.65368200  |
| H    | -1.82713900 | -0.86061300 | 5.25514500  |
| H    | -0.08701600 | -0.02402200 | 3.86809000  |
| N    | -1.25759900 | -0.45469400 | 2.18828400  |
| P    | -1.68370600 | -0.50692800 | -0.72915900 |
| C    | -1.43273300 | -0.84870800 | -2.51392300 |
| C    | -2.16400100 | -0.17407200 | -3.50268700 |
| C    | -0.49111400 | -1.81851300 | -2.89995700 |
| C    | -1.95330700 | -0.46275100 | -4.85315800 |
| H    | -2.89427600 | 0.57840700  | -3.22665500 |
| C    | -0.29143700 | -2.10965900 | -4.24809600 |
| H    | 0.08643700  | -2.34829000 | -2.14978300 |
| C    | -1.01915700 | -1.42822500 | -5.22827000 |
| H    | -2.52273000 | 0.06952000  | -5.60948800 |

|   |             |             |             |
|---|-------------|-------------|-------------|
| H | 0.43637800  | -2.86331300 | -4.53450600 |
| H | -0.85722400 | -1.65112000 | -6.27889000 |
| C | -2.93277200 | 0.84064100  | -0.65986600 |
| C | -2.50377700 | 2.16069100  | -0.87659400 |
| C | -4.29459200 | 0.58726700  | -0.43061700 |
| C | -3.42759000 | 3.20624900  | -0.87230600 |
| H | -1.45515900 | 2.37512200  | -1.05191800 |
| C | -5.21128200 | 1.64064700  | -0.41463900 |
| H | -4.64818600 | -0.42650300 | -0.27343500 |
| C | -4.78051400 | 2.95018200  | -0.63780600 |
| H | -3.08466000 | 4.22140900  | -1.04957600 |
| H | -6.26289500 | 1.43401400  | -0.23741000 |
| H | -5.49747200 | 3.76631800  | -0.63341500 |
| C | -1.11389200 | 1.77016600  | 3.35469500  |
| C | -2.25107200 | 2.42399500  | 2.85966600  |
| C | -0.01866600 | 2.53501600  | 3.77326500  |
| C | -2.28998300 | 3.81620700  | 2.78948100  |
| H | -3.10971700 | 1.84933700  | 2.52075100  |
| C | -0.05745100 | 3.92945000  | 3.70655500  |
| H | 0.86761500  | 2.03674100  | 4.15788200  |
| C | -1.19451500 | 4.57241200  | 3.21496100  |
| H | -3.17676900 | 4.30935700  | 2.40261700  |
| H | 0.79598300  | 4.51074700  | 4.04395300  |
| H | -1.22972000 | 5.65705100  | 3.16726900  |
| C | 3.95511100  | -1.41308600 | -2.69915000 |
| C | 3.49578800  | -0.45995500 | -1.77270900 |
| C | 4.23695300  | 0.72649200  | -1.62575000 |
| C | 5.38813700  | 0.95306100  | -2.38053700 |
| C | 5.82463700  | -0.00072500 | -3.30174300 |
| C | 5.10121200  | -1.18454000 | -3.45941900 |
| H | 3.40481300  | -2.34013000 | -2.83769900 |
| H | 3.90350000  | 1.47989100  | -0.91868100 |
| H | 5.94497800  | 1.87661400  | -2.24686000 |
| H | 6.72139200  | 0.17475100  | -3.88900000 |
| H | 5.43150600  | -1.93425900 | -4.17305300 |
| C | 5.01287400  | -0.94589800 | 2.04148700  |
| C | 3.81023900  | -0.33971600 | 2.79355900  |
| C | 2.59801900  | -0.75106600 | 1.97785600  |
| C | 2.88557600  | -2.00837800 | 1.18897500  |
| C | 4.43355400  | -2.05118200 | 1.15358300  |
| H | 5.47964700  | -0.20748400 | 1.37742900  |
| H | 5.79999700  | -1.34016700 | 2.68953800  |
| H | 3.83808600  | 0.74659100  | 2.91296000  |
| H | 3.71275900  | -0.77397200 | 3.79882000  |
| O | 5.06849100  | -2.86889000 | 0.53441400  |
| O | 1.54996800  | -0.10225000 | 1.96796500  |
| C | 2.43176500  | -3.23285700 | 2.03942200  |
| H | 1.34434100  | -3.22318100 | 2.16708500  |
| H | 2.72487500  | -4.14382700 | 1.50901200  |
| H | 2.90042400  | -3.25390400 | 3.02940700  |
| C | 2.22842000  | -2.06093600 | -0.21398500 |
| H | 2.75126300  | -2.85110300 | -0.76328800 |
| H | 1.18738200  | -2.38241000 | -0.08638300 |
| C | 2.27507100  | -0.72441600 | -0.94739500 |
| C | 1.29228700  | 0.17148100  | -0.71667800 |
| C | 1.17817000  | 1.52557800  | -1.29682100 |
| C | 1.07229600  | 1.72898900  | -2.68711100 |
| C | 1.12401600  | 2.65511300  | -0.45347500 |
| C | 0.92847400  | 3.01352200  | -3.21094500 |
| H | 1.11164900  | 0.87207900  | -3.35193000 |
| C | 0.98706400  | 3.93944100  | -0.98158100 |
| H | 1.19836100  | 2.52111000  | 0.62294300  |
| C | 0.88551900  | 4.12382200  | -2.36313800 |

|   |            |            |             |
|---|------------|------------|-------------|
| H | 0.85461900 | 3.14844800 | -4.28670700 |
| H | 0.95976300 | 4.79547800 | -0.31263700 |
| H | 0.77873400 | 5.12308300 | -2.77577900 |

### 10-RR-ts

B3LYP SCF energy: -2644.664429 a.u.

B3LYP enthalpy: -2643.850165 a.u.

B3LYP free energy: -2643.979565 a.u.

M06 SCF energy in solution: -2643.840711 a.u.

Imaginary frequency: -260.15 cm<sup>-1</sup>

#### Cartesian coordinates

| ATOM | X           | Y           | Z           |
|------|-------------|-------------|-------------|
| Ni   | -0.30123200 | -0.60693700 | -0.62240500 |
| C    | -1.43262700 | 3.61824400  | -1.89212700 |
| C    | -1.62580100 | 2.27304300  | -1.55581800 |
| C    | -2.50456200 | 1.50052700  | -2.35472200 |
| C    | -3.15180400 | 2.08850900  | -3.45279400 |
| C    | -2.93223700 | 3.42525100  | -3.77845800 |
| C    | -2.07277700 | 4.19113700  | -2.99524000 |
| H    | -0.77570200 | 4.23317100  | -1.28804600 |
| H    | -3.82566600 | 1.48697400  | -4.05117100 |
| H    | -3.43452900 | 3.86189000  | -4.63597100 |
| H    | -1.89843200 | 5.23652900  | -3.23234500 |
| C    | -2.79696100 | 0.08280400  | -2.07954600 |
| O    | -3.89224400 | -0.40568500 | -2.67801600 |
| C    | -3.98333200 | -1.81950100 | -2.35393700 |
| C    | -2.79506800 | -2.07831400 | -1.39030700 |
| H    | -4.95882300 | -1.99072100 | -1.89636900 |
| H    | -3.91214100 | -2.37727700 | -3.29042300 |
| H    | -2.08315200 | -2.77732200 | -1.83024900 |
| N    | -2.12157100 | -0.74588300 | -1.35017100 |
| P    | -0.81314100 | 1.54037100  | -0.06248700 |
| C    | 0.46948600  | 2.76597600  | 0.41088300  |
| C    | 0.45660000  | 3.38721300  | 1.66886900  |
| C    | 1.50154500  | 3.07536100  | -0.49244900 |
| C    | 1.45526100  | 4.30142600  | 2.01314600  |
| H    | -0.33065500 | 3.16374000  | 2.38028200  |
| C    | 2.48791900  | 3.99877200  | -0.14937100 |
| H    | 1.52338300  | 2.61482200  | -1.47624600 |
| C    | 2.46943200  | 4.61087200  | 1.10687500  |
| H    | 1.43238900  | 4.77641700  | 2.98967700  |
| H    | 3.27065200  | 4.24128600  | -0.86214800 |
| H    | 3.24047200  | 5.32733900  | 1.37452000  |
| C    | -2.10275200 | 1.67041600  | 1.24110500  |
| C    | -2.09392300 | 0.75755800  | 2.30646800  |
| C    | -3.06357900 | 2.69600000  | 1.21898200  |
| C    | -3.02624400 | 0.87756600  | 3.33905200  |
| H    | -1.36502500 | -0.04461200 | 2.33624300  |
| C    | -3.99790200 | 2.80424200  | 2.24869100  |
| H    | -3.08445700 | 3.41155700  | 0.40299400  |
| C    | -3.97867900 | 1.89724400  | 3.31171400  |
| H    | -3.00646100 | 0.16745600  | 4.16039400  |
| H    | -4.73792700 | 3.59891000  | 2.22204000  |
| H    | -4.70464300 | 1.98688900  | 4.11487800  |
| C    | -3.19844900 | -2.59322000 | -0.02156400 |
| C    | -4.10808500 | -1.89049700 | 0.78065100  |
| C    | -2.69528600 | -3.81789400 | 0.43368900  |
| C    | -4.50802700 | -2.40539000 | 2.01345000  |
| H    | -4.50874900 | -0.93662500 | 0.44523900  |
| C    | -3.09764100 | -4.33683400 | 1.66666700  |

|   |             |             |             |
|---|-------------|-------------|-------------|
| H | -1.98898900 | -4.36752700 | -0.18310200 |
| C | -4.00518700 | -3.63118400 | 2.45850600  |
| H | -5.21645400 | -1.85232700 | 2.62337300  |
| H | -2.70998300 | -5.29483700 | 2.00190300  |
| H | -4.32597500 | -4.03690100 | 3.41382800  |
| C | 4.79307700  | 1.11899300  | -0.43387900 |
| C | 3.98366500  | 0.12947400  | 0.16010800  |
| C | 4.49530400  | -0.55698900 | 1.28167200  |
| C | 5.75743200  | -0.25945000 | 1.78701400  |
| C | 6.53478900  | 0.74299100  | 1.19968600  |
| C | 6.04532400  | 1.43343100  | 0.08975900  |
| H | 4.43436300  | 1.65796500  | -1.30471700 |
| H | 3.90717500  | -1.33933800 | 1.74734400  |
| H | 6.13782700  | -0.81455700 | 2.63959400  |
| H | 7.51804100  | 0.97544700  | 1.59798100  |
| H | 6.64539500  | 2.20761400  | -0.37951100 |
| C | 3.53823300  | -3.47348000 | -1.04477200 |
| C | 2.09008100  | -3.51438400 | -0.54194600 |
| C | 1.36992900  | -2.29353800 | -1.14299500 |
| C | 2.23251600  | -1.70732300 | -2.30586000 |
| C | 3.53965800  | -2.53599300 | -2.24779800 |
| H | 4.22222600  | -3.04918900 | -0.29852100 |
| H | 3.94109100  | -4.45156100 | -1.32339500 |
| H | 2.00474400  | -3.56213500 | 0.54401600  |
| H | 1.55506400  | -4.38735600 | -0.94001600 |
| O | 4.43505100  | -2.42254600 | -3.05277700 |
| O | 0.07663300  | -2.34045500 | -1.23751100 |
| C | 1.57373700  | -1.87215300 | -3.68235200 |
| H | 0.64664500  | -1.29326200 | -3.73728400 |
| H | 2.26500300  | -1.52181100 | -4.45471700 |
| H | 1.33436900  | -2.91921900 | -3.89575700 |
| C | 2.57536100  | -0.24307700 | -1.96897900 |
| H | 3.50115200  | 0.04624100  | -2.47139000 |
| H | 1.77724100  | 0.42143700  | -2.32315700 |
| C | 2.67726000  | -0.21741100 | -0.44018800 |
| C | 1.56490400  | -0.73221000 | 0.17273800  |
| C | 1.28251100  | -0.90845300 | 1.61891400  |
| C | 0.50793700  | -1.99587200 | 2.07865900  |
| C | 1.68071400  | 0.05856300  | 2.56858800  |
| C | 0.19746700  | -2.13976500 | 3.43247200  |
| H | 0.12735600  | -2.72476900 | 1.37179300  |
| C | 1.36245300  | -0.08606800 | 3.91705200  |
| H | 2.24862200  | 0.92321300  | 2.24496500  |
| C | 0.62865600  | -1.19084000 | 4.36033700  |
| H | -0.39351100 | -2.99251300 | 3.75442300  |
| H | 1.69034200  | 0.66906600  | 4.62624800  |
| H | 0.38966400  | -1.30352400 | 5.41386600  |

### 11-RR

B3LYP SCF energy: -2644.688431 a.u.

B3LYP enthalpy: -2643.87253 a.u.

B3LYP free energy: -2644.006898 a.u.

M06 SCF energy in solution: -2643.858996 a.u.

#### Cartesian coordinates

| ATOM | X           | Y          | Z           |
|------|-------------|------------|-------------|
| Ni   | 1.21087300  | 6.93822700 | 1.25585500  |
| C    | -1.65760600 | 7.05125300 | -2.30591800 |
| C    | -0.59357500 | 7.41762400 | -1.47114400 |
| C    | -0.23673300 | 8.78531500 | -1.39132500 |
| C    | -0.93376200 | 9.73462100 | -2.15692100 |
| C    | -1.98741000 | 9.34834200 | -2.98156700 |

|   |             |             |             |
|---|-------------|-------------|-------------|
| C | -2.35054400 | 8.00505000  | -3.05528700 |
| H | -1.95041200 | 6.00935900  | -2.37295900 |
| H | -0.64939300 | 10.77806500 | -2.09150200 |
| H | -2.52174700 | 10.09588300 | -3.55931100 |
| H | -3.17150600 | 7.69249600  | -3.69353500 |
| C | 0.84460700  | 9.28268900  | -0.52822300 |
| O | 1.29370500  | 10.50980200 | -0.81135400 |
| C | 2.40401500  | 10.80092500 | 0.08001600  |
| C | 2.43417400  | 9.60142600  | 1.06283800  |
| H | 3.30634300  | 10.87205800 | -0.53131100 |
| H | 2.20354300  | 11.75901700 | 0.56148400  |
| H | 2.07595300  | 9.91279200  | 2.05000900  |
| N | 1.40205700  | 8.68961000  | 0.48262100  |
| P | 0.31032900  | 6.10350300  | -0.55341100 |
| C | -0.89822400 | 4.75458800  | -0.36794500 |
| C | -0.87080800 | 3.63365600  | -1.21192700 |
| C | -1.91820300 | 4.88652100  | 0.58741000  |
| C | -1.86787200 | 2.66174000  | -1.10592300 |
| H | -0.08091900 | 3.51837800  | -1.94717400 |
| C | -2.91544900 | 3.91807000  | 0.67949400  |
| H | -1.93185200 | 5.73985400  | 1.25942300  |
| C | -2.89021800 | 2.80532800  | -0.16695100 |
| H | -1.84292200 | 1.79393200  | -1.75829800 |
| H | -3.69838900 | 4.02128600  | 1.42390600  |
| H | -3.66477400 | 2.04798200  | -0.08914100 |
| C | 1.65846400  | 5.51650600  | -1.63811700 |
| C | 2.66473500  | 4.72297600  | -1.05676300 |
| C | 1.70847000  | 5.82115000  | -3.00762100 |
| C | 3.69981500  | 4.23041000  | -1.85121200 |
| H | 2.63103200  | 4.50494200  | 0.00719200  |
| C | 2.75430700  | 5.32871200  | -3.79059800 |
| H | 0.93805900  | 6.43299300  | -3.46630600 |
| C | 3.74691900  | 4.53265400  | -3.21515100 |
| H | 4.47185100  | 3.61190600  | -1.40266600 |
| H | 2.78955100  | 5.56511900  | -4.85004100 |
| H | 4.55655900  | 4.14850100  | -3.82893100 |
| C | 3.79640800  | 8.95257500  | 1.21840900  |
| C | 4.35172000  | 8.17545900  | 0.19101300  |
| C | 4.53692400  | 9.17117800  | 2.38729700  |
| C | 5.62354800  | 7.62107900  | 0.33817900  |
| H | 3.79255400  | 7.99633400  | -0.72371500 |
| C | 5.81277000  | 8.62210400  | 2.53026100  |
| H | 4.11845600  | 9.77653100  | 3.18845000  |
| C | 6.35644200  | 7.84381000  | 1.50674100  |
| H | 6.04110300  | 7.01603200  | -0.46117000 |
| H | 6.37816400  | 8.80206500  | 3.43979000  |
| H | 7.34769100  | 7.41430000  | 1.61780900  |
| C | -2.63337100 | 4.28218300  | 5.96087700  |
| C | -1.97453100 | 3.84617200  | 4.79562200  |
| C | -2.57515000 | 2.81223100  | 4.04973700  |
| C | -3.77532200 | 2.23579200  | 4.45956500  |
| C | -4.40917400 | 2.67385400  | 5.62562700  |
| C | -3.83129900 | 3.69927800  | 6.37454100  |
| H | -2.20004600 | 5.07352700  | 6.56424500  |
| H | -2.09585400 | 2.46449900  | 3.14208600  |
| H | -4.21730600 | 1.43853700  | 3.86756000  |
| H | -5.34318600 | 2.22059200  | 5.94545000  |
| H | -4.31169000 | 4.04850500  | 7.28429400  |
| C | 2.81192000  | 4.59472500  | 3.77957900  |
| C | 2.82104900  | 4.79801100  | 5.29841700  |
| C | 1.88170300  | 5.97642600  | 5.51938800  |
| C | 0.98923400  | 6.19349500  | 4.26548900  |
| C | 1.38510100  | 5.01410600  | 3.32095100  |

|   |             |             |            |
|---|-------------|-------------|------------|
| H | 3.04832900  | 3.57428900  | 3.46982600 |
| H | 3.53333400  | 5.26611500  | 3.29855200 |
| H | 2.40282000  | 3.92805600  | 5.82331800 |
| H | 3.80484400  | 4.99420100  | 5.73473300 |
| O | 1.44302600  | 5.29394000  | 1.92450500 |
| O | 1.82600100  | 6.68355100  | 6.50114600 |
| C | 1.27698100  | 7.59200200  | 3.71707800 |
| H | 1.18930900  | 8.34631000  | 4.50798100 |
| H | 0.52252500  | 7.88328700  | 2.95839300 |
| H | 2.29751200  | 7.67230800  | 3.31597500 |
| C | -0.48891700 | 5.96867700  | 4.63487500 |
| H | -1.16689000 | 6.58678300  | 4.02528500 |
| H | -0.67236600 | 6.25559200  | 5.67609600 |
| C | -0.71559000 | 4.49187300  | 4.35965700 |
| C | 0.32013800  | 3.95719400  | 3.66345300 |
| C | 0.54919800  | 2.52976800  | 3.33132800 |
| C | 0.46327800  | 1.54738800  | 4.33598200 |
| C | 0.92480800  | 2.12613600  | 2.03773500 |
| C | 0.72722700  | 0.20816600  | 4.05369400 |
| H | 0.18690600  | 1.84188500  | 5.34409900 |
| C | 1.18569500  | 0.78406300  | 1.75642200 |
| H | 1.00146400  | 2.87282800  | 1.25583800 |
| C | 1.08787100  | -0.18017400 | 2.76111100 |
| H | 0.65644200  | -0.53211100 | 4.84591600 |
| H | 1.46745600  | 0.49091400  | 0.74816000 |
| H | 1.29471800  | -1.22384600 | 2.54124800 |

## 12-SS-ts

B3LYP SCF energy: -2644.665814 a.u.

B3LYP enthalpy: -2643.851547 a.u.

B3LYP free energy: -2643.980369 a.u.

M06 SCF energy in solution: -2643.837418 a.u.

Imaginary frequency: -224.71 cm<sup>-1</sup>

## Cartesian coordinates

| ATOM | X           | Y           | Z           |
|------|-------------|-------------|-------------|
| Ni   | 0.36841300  | 0.43642900  | -0.77708300 |
| C    | 1.65852400  | -4.00774500 | -0.69175100 |
| C    | 1.78183900  | -2.61301500 | -0.72732900 |
| C    | 2.77438400  | -2.04965700 | -1.56656400 |
| C    | 3.58656500  | -2.88723500 | -2.34883900 |
| C    | 3.43141400  | -4.27072100 | -2.31292400 |
| C    | 2.47023700  | -4.83165700 | -1.47631000 |
| H    | 0.91900800  | -4.46449900 | -0.04543500 |
| H    | 4.34273400  | -2.44222200 | -2.98399200 |
| H    | 4.06376400  | -4.90170000 | -2.92963200 |
| H    | 2.34593600  | -5.90937400 | -1.42650500 |
| C    | 3.04500400  | -0.60299200 | -1.63362400 |
| O    | 4.21994500  | -0.27608400 | -2.19159600 |
| C    | 4.26149500  | 1.17076600  | -2.30292100 |
| C    | 3.06443200  | 1.64971600  | -1.44339600 |
| H    | 5.23064300  | 1.50390600  | -1.93147200 |
| H    | 4.15939700  | 1.42206200  | -3.36261100 |
| H    | 2.42319600  | 2.31873900  | -2.01580200 |
| N    | 2.31012000  | 0.38080700  | -1.21882800 |
| P    | 0.69079100  | -1.54936900 | 0.32325300  |
| C    | -0.63991700 | -2.70298800 | 0.86255300  |
| C    | -0.82535700 | -3.02274500 | 2.21635100  |
| C    | -1.47471900 | -3.29961500 | -0.10009200 |
| C    | -1.82416100 | -3.92146100 | 2.59864300  |
| H    | -0.19210200 | -2.58086000 | 2.97709900  |

|   |             |             |             |
|---|-------------|-------------|-------------|
| C | -2.46404000 | -4.20300400 | 0.28648200  |
| H | -1.35352000 | -3.06750100 | -1.15246600 |
| C | -2.64202200 | -4.51571600 | 1.63740100  |
| H | -1.95450300 | -4.15952600 | 3.65024800  |
| H | -3.09625500 | -4.66011500 | -0.46916100 |
| H | -3.41147100 | -5.22181000 | 1.93643400  |
| C | 1.67705700  | -1.24500900 | 1.84732200  |
| C | 1.24939800  | -0.24465200 | 2.73514500  |
| C | 2.81178600  | -2.00496700 | 2.16975900  |
| C | 1.93740400  | -0.01405000 | 3.92634300  |
| H | 0.36922900  | 0.34761700  | 2.50507800  |
| C | 3.50649300  | -1.76202400 | 3.35687600  |
| H | 3.15401400  | -2.79014800 | 1.50354500  |
| C | 3.06985400  | -0.77028100 | 4.23752900  |
| H | 1.59137500  | 0.75822800  | 4.60702700  |
| H | 4.38395700  | -2.35611000 | 3.59572800  |
| H | 3.60715400  | -0.59027100 | 5.16421100  |
| C | 3.48101000  | 2.34874200  | -0.16128200 |
| C | 4.01498900  | 1.64785000  | 0.92761700  |
| C | 3.41622100  | 3.74731800  | -0.10189600 |
| C | 4.47113000  | 2.33454800  | 2.05401600  |
| H | 4.07091300  | 0.56318800  | 0.90667200  |
| C | 3.87684100  | 4.43535900  | 1.02232200  |
| H | 3.00952000  | 4.30187800  | -0.94451400 |
| C | 4.40480700  | 3.72869600  | 2.10434500  |
| H | 4.87918900  | 1.77717400  | 2.89205800  |
| H | 3.82336000  | 5.51995100  | 1.05134000  |
| H | 4.76435500  | 4.26110100  | 2.98021200  |
| C | -4.16062100 | 1.58749200  | 2.01088900  |
| C | -3.34904800 | 0.65154200  | 1.33142600  |
| C | -3.68587800 | -0.71432600 | 1.43454000  |
| C | -4.78093100 | -1.12703600 | 2.18617900  |
| C | -5.58069100 | -0.18710900 | 2.84290000  |
| C | -5.26935000 | 1.17004100  | 2.74495000  |
| H | -3.95778200 | 2.64981800  | 1.93199300  |
| H | -3.07505000 | -1.45178400 | 0.92994600  |
| H | -5.00873800 | -2.18626900 | 2.26103000  |
| H | -6.43832200 | -0.51046800 | 3.42594500  |
| H | -5.88948900 | 1.91023900  | 3.24204800  |
| C | -1.88118500 | 2.80117800  | -2.55374400 |
| C | -3.11588900 | 3.46479000  | -1.92997800 |
| C | -2.73553500 | 3.80551000  | -0.48817600 |
| C | -1.32738000 | 3.27004400  | -0.14234100 |
| C | -0.94989900 | 2.46287700  | -1.39861600 |
| H | -2.10163500 | 1.91987300  | -3.16153200 |
| H | -1.32420100 | 3.49598700  | -3.19819500 |
| H | -3.97654900 | 2.78563100  | -1.89590200 |
| H | -3.44953200 | 4.36616800  | -2.45365200 |
| O | 0.25947100  | 2.09913300  | -1.63494100 |
| O | -3.43520200 | 4.40823800  | 0.29582100  |
| C | -0.37577500 | 4.46265500  | 0.07726100  |
| H | -0.73451200 | 5.05750100  | 0.92313600  |
| H | 0.63725600  | 4.10903100  | 0.28790200  |
| H | -0.33561200 | 5.11854500  | -0.79997900 |
| C | -1.40099200 | 2.32411200  | 1.05984300  |
| H | -0.38826800 | 2.06269000  | 1.39409900  |
| H | -1.89468000 | 2.81104500  | 1.90287800  |
| C | -2.15538500 | 1.08038900  | 0.56802000  |
| C | -1.65993900 | 0.54535000  | -0.59675800 |
| C | -2.35971300 | -0.25112200 | -1.62794000 |
| C | -1.62167200 | -0.91665100 | -2.63058000 |
| C | -3.76759000 | -0.25721700 | -1.76162000 |
| C | -2.24678000 | -1.59272800 | -3.68002700 |

|   |             |             |             |
|---|-------------|-------------|-------------|
| H | -0.53426800 | -0.88951500 | -2.59630200 |
| C | -4.39251500 | -0.93547700 | -2.80471400 |
| H | -4.37791700 | 0.26884300  | -1.03683500 |
| C | -3.63870700 | -1.61458900 | -3.76719800 |
| H | -1.64331700 | -2.09274700 | -4.43280800 |
| H | -5.47700400 | -0.92629100 | -2.87159200 |
| H | -4.13099500 | -2.13712900 | -4.58214200 |

### 13-SS

B3LYP SCF energy: -2644.691976 a.u.

B3LYP enthalpy: -2643.875796 a.u.

B3LYP free energy: -2644.009898 a.u.

M06 SCF energy in solution: -2643.856606 a.u.

### Cartesian coordinates

| ATOM | X           | Y           | Z           |
|------|-------------|-------------|-------------|
| Ni   | 0.86069600  | 0.65981600  | -0.41838100 |
| C    | 5.38801600  | -0.33428700 | -0.43372700 |
| C    | 4.19375600  | 0.39952800  | -0.39913200 |
| C    | 4.23968800  | 1.78280900  | -0.69966800 |
| C    | 5.47335400  | 2.38825600  | -0.99533500 |
| C    | 6.64906300  | 1.64287900  | -1.01060700 |
| C    | 6.60676300  | 0.27746600  | -0.73412300 |
| H    | 5.36683600  | -1.39886100 | -0.22500100 |
| H    | 5.49940200  | 3.44645800  | -1.22539400 |
| H    | 7.59118500  | 2.12784400  | -1.24587400 |
| H    | 7.51617500  | -0.31552900 | -0.75153900 |
| C    | 3.04386800  | 2.63638600  | -0.76323600 |
| O    | 3.26325600  | 3.94670800  | -0.92867800 |
| C    | 1.97828700  | 4.62763400  | -0.86860800 |
| C    | 0.93694900  | 3.48414300  | -0.90385100 |
| H    | 1.95095500  | 5.20115800  | 0.06108600  |
| H    | 1.91985800  | 5.30280200  | -1.72266600 |
| H    | 0.48957500  | 3.40465000  | -1.90133500 |
| N    | 1.79996700  | 2.27628900  | -0.71358100 |
| P    | 2.65456000  | -0.47989400 | 0.08924400  |
| C    | 2.84107100  | -2.14638700 | -0.63951000 |
| C    | 2.86152200  | -3.29957700 | 0.15863400  |
| C    | 2.95128700  | -2.26441900 | -2.03683300 |
| C    | 2.99198200  | -4.55604900 | -0.43764500 |
| H    | 2.77416000  | -3.22160900 | 1.23716100  |
| C    | 3.08329900  | -3.52119900 | -2.62353000 |
| H    | 2.94105200  | -1.37803300 | -2.66569500 |
| C    | 3.10118500  | -4.66879100 | -1.82434800 |
| H    | 3.00914200  | -5.44525300 | 0.18550600  |
| H    | 3.16968100  | -3.60582400 | -3.70270900 |
| H    | 3.20092000  | -5.64765700 | -2.28392100 |
| C    | 2.68414600  | -0.65701700 | 1.91059700  |
| C    | 1.47761700  | -0.98961000 | 2.55300800  |
| C    | 3.85570900  | -0.49602800 | 2.66810300  |
| C    | 1.45607000  | -1.18203200 | 3.93432900  |
| H    | 0.56240600  | -1.08830400 | 1.97628700  |
| C    | 3.81941500  | -0.67804800 | 4.05114000  |
| H    | 4.79264400  | -0.22995600 | 2.19042100  |
| C    | 2.62388300  | -1.02491100 | 4.68447700  |
| H    | 0.52176000  | -1.44758300 | 4.42023300  |
| H    | 4.72778000  | -0.54992300 | 4.63250000  |
| H    | 2.60243800  | -1.16772500 | 5.76096500  |
| C    | -0.17336100 | 3.57273500  | 0.12367600  |
| C    | 0.11804200  | 3.64090400  | 1.49527200  |
| C    | -1.50963100 | 3.58462500  | -0.29296200 |
| C    | -0.91314100 | 3.72373400  | 2.42950400  |



|   |             |             |             |
|---|-------------|-------------|-------------|
| H | 1.15068700  | 3.62934800  | 1.83753000  |
| C | -2.54303100 | 3.66849700  | 0.64259600  |
| H | -1.74584400 | 3.53049600  | -1.35326200 |
| C | -2.24495600 | 3.73840700  | 2.00401200  |
| H | -0.67833400 | 3.78047900  | 3.48843700  |
| H | -3.57563700 | 3.66874300  | 0.30729500  |
| H | -3.04670600 | 3.80575600  | 2.73350300  |
| C | -5.85688700 | 0.27097300  | -1.96907500 |
| C | -4.93794500 | 0.28138300  | -0.90287900 |
| C | -5.33048100 | 0.89438500  | 0.30349900  |
| C | -6.59416500 | 1.46587300  | 0.43721700  |
| C | -7.49892500 | 1.43549700  | -0.62737900 |
| C | -7.12492600 | 0.83433900  | -1.83023700 |
| H | -5.58772600 | -0.19712600 | -2.91101400 |
| H | -4.63439500 | 0.92806600  | 1.13439900  |
| H | -6.87480800 | 1.93549600  | 1.37625400  |
| H | -8.48539800 | 1.87770800  | -0.52016400 |
| H | -7.82062000 | 0.80332800  | -2.66414900 |
| C | -0.96023400 | -2.69020400 | -0.47735200 |
| C | -1.71620700 | -3.49860800 | -1.53920400 |
| C | -1.98363800 | -2.51132900 | -2.67525300 |
| C | -1.62493500 | -1.06914800 | -2.23526100 |
| C | -1.41277700 | -1.22849300 | -0.69506100 |
| H | -1.15555700 | -3.02295400 | 0.54583700  |
| H | 0.11931500  | -2.75109300 | -0.65001600 |
| H | -2.68834000 | -3.84996600 | -1.16897300 |
| H | -1.18194900 | -4.37905900 | -1.90948200 |
| O | -0.55923000 | -0.30153900 | -0.05559900 |
| O | -2.40907800 | -2.79543800 | -3.77294600 |
| C | -0.41589600 | -0.61139800 | -3.05613500 |
| H | -0.67782300 | -0.59756000 | -4.11950800 |
| H | -0.10723100 | 0.40473200  | -2.77192400 |
| H | 0.44397000  | -1.27895600 | -2.93209000 |
| C | -2.85238000 | -0.15682300 | -2.39361700 |
| H | -2.56796600 | 0.89209700  | -2.56664100 |
| H | -3.44839300 | -0.46306100 | -3.26046800 |
| C | -3.58594600 | -0.29256700 | -1.07271500 |
| C | -2.82104800 | -0.92175700 | -0.14595500 |
| C | -3.20190800 | -1.31190900 | 1.23402900  |
| C | -4.26438800 | -2.20927000 | 1.44126600  |
| C | -2.50870500 | -0.82640000 | 2.35781900  |
| C | -4.62457600 | -2.60806700 | 2.72862900  |
| H | -4.81321300 | -2.58858000 | 0.58387200  |
| C | -2.87421800 | -1.22373300 | 3.64545800  |
| H | -1.70152600 | -0.11670700 | 2.21173000  |
| C | -3.93007400 | -2.11791100 | 3.83639000  |
| H | -5.44986500 | -3.30138700 | 2.86552000  |
| H | -2.34098500 | -0.82266100 | 4.50432800  |
| H | -4.21328600 | -2.42545500 | 4.83915200  |

#### PhB(OH)<sub>2</sub>

B3LYP SCF energy: -408.251372 a.u.

B3LYP enthalpy: -408.117603 a.u.

B3LYP free energy: -408.159333 a.u.

M06 SCF energy in solution: -408.131202 a.u.

#### Cartesian coordinates

| ATOM | X          | Y           | Z           |
|------|------------|-------------|-------------|
| C    | 1.48943700 | -0.67756900 | 0.92903100  |
| C    | 2.58538600 | -0.88855800 | 0.07290500  |
| C    | 2.92573600 | 0.13626200  | -0.82841300 |
| C    | 2.20071500 | 1.32705400  | -0.87473700 |

|   |             |             |             |
|---|-------------|-------------|-------------|
| C | 1.11552800  | 1.51554900  | -0.01503300 |
| C | 0.75993200  | 0.51065900  | 0.88832700  |
| H | 1.21073900  | -1.45739900 | 1.63265000  |
| H | 3.76953500  | -0.00785600 | -1.49777000 |
| H | 2.47921200  | 2.10760300  | -1.57846400 |
| H | 0.54851300  | 2.44276200  | -0.04907200 |
| H | -0.08414700 | 0.65519000  | 1.55816800  |
| B | 3.40014700  | -2.21969000 | 0.12173300  |
| O | 4.46145500  | -2.36475800 | -0.74207400 |
| H | 4.93065000  | -3.20756200 | -0.66749700 |
| O | 3.01838100  | -3.18379000 | 1.02625700  |
| H | 3.55800600  | -3.98670300 | 1.01294200  |

#### 14-ts

B3LYP SCF energy: -3052.911355 a.u.

B3LYP enthalpy: -3051.960936 a.u.

B3LYP free energy: -3052.107627 a.u.

M06 SCF energy in solution: -3051.98227 a.u.

Imaginary frequency: -171.46 cm<sup>-1</sup>

#### Cartesian coordinates

| ATOM | X           | Y           | Z           |
|------|-------------|-------------|-------------|
| Ni   | 1.00979500  | -0.57525600 | 0.23480900  |
| C    | 0.73885400  | 3.79539200  | 1.76202100  |
| C    | 1.29022900  | 2.55637000  | 1.41735400  |
| C    | 2.20630700  | 1.94750100  | 2.31091500  |
| C    | 2.51501500  | 2.58311900  | 3.52578700  |
| C    | 1.93647900  | 3.80532200  | 3.86077300  |
| C    | 1.05558000  | 4.41792700  | 2.97300800  |
| H    | 0.04699300  | 4.28077900  | 1.08308000  |
| H    | 3.21628800  | 2.11359400  | 4.20428300  |
| H    | 2.18192000  | 4.27580900  | 4.80762400  |
| H    | 0.60998000  | 5.37810600  | 3.21569500  |
| C    | 2.93692300  | 0.70230500  | 2.00253500  |
| O    | 4.00141400  | 0.49158500  | 2.78913800  |
| C    | 4.50459500  | -0.83434600 | 2.47980000  |
| C    | 3.93735100  | -1.09822600 | 1.07357200  |
| H    | 5.59202500  | -0.79732600 | 2.52422100  |
| H    | 4.11217700  | -1.52122700 | 3.23718200  |
| H    | 3.60291600  | -2.12843000 | 0.98523900  |
| N    | 2.73904800  | -0.19152300 | 1.06999900  |
| P    | 0.84387500  | 1.69959900  | -0.14588300 |
| C    | -0.70511900 | 2.48194500  | -0.74100300 |
| C    | -0.81927400 | 2.88155200  | -2.08259700 |
| C    | -1.79787200 | 2.67229100  | 0.12210400  |
| C    | -1.99604300 | 3.47531400  | -2.54229700 |
| H    | 0.00887100  | 2.74304000  | -2.76813800 |
| C    | -2.96378700 | 3.28138700  | -0.33776700 |
| H    | -1.73596000 | 2.36846300  | 1.16179600  |
| C    | -3.06551600 | 3.68406900  | -1.67182600 |
| H    | -2.06788000 | 3.78404300  | -3.58113000 |
| H    | -3.79633500 | 3.43097800  | 0.34186000  |
| H    | -3.97697400 | 4.15480800  | -2.02812800 |
| C    | 2.11756300  | 2.23085700  | -1.35927500 |
| C    | 2.37719700  | 1.41985400  | -2.47562700 |
| C    | 2.77653000  | 3.46411900  | -1.22880200 |
| C    | 3.27529200  | 1.84906100  | -3.45454500 |
| H    | 1.86507700  | 0.46830900  | -2.57705100 |
| C    | 3.68102700  | 3.88017500  | -2.20668500 |
| H    | 2.58427600  | 4.10418200  | -0.37350000 |
| C    | 3.92778700  | 3.07626900  | -3.32231100 |

|   |             |             |             |
|---|-------------|-------------|-------------|
| H | 3.46846900  | 1.22038300  | -4.31906800 |
| H | 4.18516400  | 4.83648500  | -2.09996100 |
| H | 4.62578600  | 3.40700300  | -4.08617600 |
| C | 4.94642400  | -0.78730500 | -0.02288800 |
| C | 5.25420600  | 0.52245400  | -0.41052000 |
| C | 5.68882400  | -1.84519400 | -0.56652700 |
| C | 6.27897300  | 0.76703800  | -1.32637000 |
| H | 4.69365300  | 1.36126500  | -0.01113600 |
| C | 6.71546300  | -1.60112600 | -1.47925300 |
| H | 5.46641300  | -2.86535500 | -0.26735100 |
| C | 7.01307000  | -0.29208900 | -1.86249500 |
| H | 6.50097500  | 1.78878700  | -1.61942400 |
| H | 7.28189800  | -2.43275700 | -1.88879200 |
| H | 7.81209200  | -0.09917000 | -2.57258000 |
| C | -6.08105400 | 0.83976500  | 1.73646500  |
| C | -5.23416300 | 0.56692000  | 0.64420300  |
| C | -5.63122700 | 1.03487800  | -0.62500600 |
| C | -6.82838700 | 1.72701100  | -0.79166900 |
| C | -7.66307700 | 1.97424200  | 0.30146200  |
| C | -7.28204900 | 1.52849000  | 1.56726700  |
| H | -5.81345300 | 0.49824300  | 2.73121400  |
| H | -4.99059900 | 0.86838700  | -1.48213200 |
| H | -7.11066900 | 2.07616300  | -1.78129100 |
| H | -8.59793700 | 2.51096700  | 0.16744000  |
| H | -7.91949100 | 1.71404800  | 2.42718000  |
| C | -2.96823900 | -3.32740300 | 2.05817100  |
| C | -2.23609000 | -3.11067200 | 0.72710700  |
| C | -2.02856100 | -1.56227600 | 0.61247200  |
| C | -2.02838200 | -1.02716900 | 2.10223300  |
| C | -2.34273900 | -2.28065200 | 2.95288500  |
| H | -4.04164500 | -3.11037500 | 1.96202900  |
| H | -2.86481800 | -4.33276300 | 2.47297100  |
| H | -2.78561100 | -3.50651700 | -0.12616200 |
| H | -1.28179500 | -3.63221700 | 0.74800200  |
| O | -2.08309800 | -2.38470200 | 4.13205700  |
| O | -0.84528100 | -1.17685700 | -0.19205700 |
| C | -0.78302900 | -0.34569800 | 2.66006900  |
| H | -0.60769500 | 0.62540900  | 2.19359000  |
| H | -0.92659200 | -0.19246300 | 3.73449500  |
| H | 0.11732200  | -0.95946500 | 2.54480100  |
| C | -3.27234500 | -0.09136800 | 2.20023300  |
| H | -3.93061700 | -0.40816400 | 3.01861600  |
| H | -2.98391200 | 0.93940100  | 2.44757700  |
| C | -3.96152700 | -0.15962300 | 0.85608300  |
| C | -3.26863800 | -0.92525100 | -0.01926100 |
| C | -3.69040300 | -1.32159600 | -1.39142600 |
| C | -4.81485100 | -2.14831300 | -1.56618800 |
| C | -2.97615700 | -0.91327400 | -2.53200900 |
| C | -5.21372000 | -2.55700800 | -2.83908500 |
| H | -5.38189200 | -2.46553200 | -0.69550800 |
| C | -3.37884900 | -1.32403700 | -3.80647400 |
| H | -2.11023700 | -0.27056100 | -2.42058900 |
| C | -4.49582100 | -2.14729900 | -3.96475800 |
| H | -6.08507800 | -3.19620900 | -2.95037500 |
| H | -2.82049100 | -0.99178800 | -4.67787600 |
| H | -4.80622900 | -2.46424700 | -4.95631000 |
| C | 1.19880000  | -3.36721000 | 1.04925100  |
| C | 1.32735900  | -2.63317200 | -0.15458400 |
| C | 2.32285500  | -3.07264600 | -1.05795300 |
| C | 3.07413500  | -4.22347800 | -0.82409900 |
| C | 2.90563000  | -4.93442500 | 0.36862800  |
| C | 1.97942000  | -4.49199900 | 1.31837400  |
| H | 0.47128100  | -3.06563300 | 1.79669400  |

|   |             |             |             |
|---|-------------|-------------|-------------|
| H | 2.47503600  | -2.52509200 | -1.98331800 |
| H | 3.78960900  | -4.56746500 | -1.56618100 |
| H | 3.49134100  | -5.83041300 | 0.55626300  |
| H | 1.85332500  | -5.03426600 | 2.25169900  |
| B | -0.14853700 | -2.06267300 | -1.17602100 |
| O | -0.73329500 | -3.25880300 | -1.62183200 |
| H | -1.49861000 | -3.05298600 | -2.18467800 |
| O | 0.33529700  | -1.16929200 | -2.20007300 |
| H | 0.58846400  | -1.70309300 | -2.96768000 |

## 15

B3LYP SCF energy: -1138.748278 a.u.

B3LYP enthalpy: -1138.342925 a.u.

B3LYP free energy: -1138.420619 a.u.

M06 SCF energy in solution: -1138.34858 a.u.

## Cartesian coordinates

| ATOM | X            | Y           | Z           |
|------|--------------|-------------|-------------|
| C    | -9.77741500  | -4.51010000 | 0.59104300  |
| C    | -8.92583800  | -4.77647300 | -0.49722200 |
| C    | -9.27872200  | -4.25548300 | -1.75583400 |
| C    | -10.44381500 | -3.50890500 | -1.92041200 |
| C    | -11.28613800 | -3.26616500 | -0.83302200 |
| C    | -10.94786300 | -3.77109400 | 0.42363600  |
| H    | -9.53188700  | -4.89899800 | 1.57464600  |
| H    | -8.62597100  | -4.42455100 | -2.60509700 |
| H    | -10.69107300 | -3.11050200 | -2.90090900 |
| H    | -12.19448400 | -2.68400300 | -0.96300600 |
| H    | -11.59405500 | -3.58773500 | 1.27800000  |
| C    | -6.47778800  | -8.96994900 | 0.64115600  |
| C    | -5.66158400  | -8.52004800 | -0.57718900 |
| C    | -5.77936200  | -6.97385000 | -0.59668400 |
| C    | -5.84818600  | -6.54303300 | 0.90292800  |
| C    | -6.47641600  | -7.77244000 | 1.59131300  |
| H    | -7.52243300  | -9.18398000 | 0.37943900  |
| H    | -6.08822300  | -9.86374600 | 1.13873300  |
| H    | -6.00996000  | -8.98656900 | -1.50329100 |
| H    | -4.60723600  | -8.78994900 | -0.44979600 |
| O    | -6.91081400  | -7.77739200 | 2.72313800  |
| O    | -4.68302700  | -6.32410700 | -1.24250400 |
| C    | -4.49290800  | -6.24303400 | 1.55804800  |
| H    | -4.00755100  | -5.40248300 | 1.05558500  |
| H    | -4.64404900  | -5.99868800 | 2.61475400  |
| H    | -3.81215800  | -7.10079700 | 1.50480500  |
| C    | -6.83954900  | -5.36839400 | 0.95025400  |
| H    | -7.41615400  | -5.38814800 | 1.88133200  |
| H    | -6.32500900  | -4.39807700 | 0.91380100  |
| C    | -7.68399000  | -5.55674600 | -0.29733800 |
| C    | -7.11650000  | -6.44814100 | -1.14323700 |
| C    | -7.65740900  | -6.93361700 | -2.43969600 |
| C    | -8.80192400  | -7.74925600 | -2.46855700 |
| C    | -7.02868700  | -6.62617700 | -3.66065500 |
| C    | -9.29849200  | -8.24592400 | -3.67413700 |
| H    | -9.30561200  | -7.98457200 | -1.53517400 |
| C    | -7.52564300  | -7.12593500 | -4.86735300 |
| H    | -6.16964500  | -5.96259100 | -3.66598000 |
| C    | -8.65937700  | -7.94054900 | -4.87777400 |
| H    | -10.18617800 | -8.87296100 | -3.67241900 |
| H    | -7.02931700  | -6.86917900 | -5.79949700 |
| H    | -9.04551500  | -8.32843200 | -5.81635500 |
| B    | -3.81707100  | -6.78653000 | -2.20041400 |

|   |             |             |             |
|---|-------------|-------------|-------------|
| O | -4.07790600 | -7.76445200 | -3.13538700 |
| H | -5.01026400 | -8.01867300 | -3.17660300 |
| O | -2.58721000 | -6.18247900 | -2.22950600 |
| H | -2.07871700 | -6.50806200 | -2.98609800 |

16

B3LYP SCF energy: -2873.373528 a.u.

B3LYP enthalpy: -2872.501128 a.u.

B3LYP free energy: -2872.644794 a.u.

M06 SCF energy in solution: -2872.465647 a.u.

Cartesian coordinates

| ATOM | X           | Y           | Z           |
|------|-------------|-------------|-------------|
| Ni   | 1.55630100  | 6.42375100  | 1.38798000  |
| C    | -1.62072000 | 8.38948300  | -1.23894800 |
| C    | -0.32450700 | 8.14826300  | -0.77058300 |
| C    | 0.47271700  | 9.25705600  | -0.38723600 |
| C    | -0.03917200 | 10.55863100 | -0.51482500 |
| C    | -1.33009100 | 10.77565900 | -0.99099500 |
| C    | -2.12417900 | 9.68853300  | -1.34763500 |
| H    | -2.24847700 | 7.55120500  | -1.51946400 |
| H    | 0.58137200  | 11.39804300 | -0.22538100 |
| H    | -1.71177100 | 11.78894900 | -1.07307400 |
| H    | -3.13636900 | 9.84331200  | -1.71070100 |
| C    | 1.83476600  | 9.11894600  | 0.16260300  |
| O    | 2.55034000  | 10.26399300 | 0.19054600  |
| C    | 3.74088300  | 9.99483100  | 0.97477800  |
| C    | 3.81889300  | 8.45282000  | 1.01545300  |
| H    | 4.58494600  | 10.46887100 | 0.47376600  |
| H    | 3.59226800  | 10.44005900 | 1.96435600  |
| H    | 3.98822000  | 8.08255700  | 2.02526600  |
| N    | 2.42590000  | 8.06633000  | 0.63610500  |
| P    | 0.33262200  | 6.43765600  | -0.56711600 |
| C    | -1.05148700 | 5.30045700  | -0.96865200 |
| C    | -1.53119700 | 5.15829500  | -2.28387700 |
| C    | -1.61064600 | 4.52637300  | 0.05896200  |
| C    | -2.57832000 | 4.27972600  | -2.55592000 |
| H    | -1.07985900 | 5.71932100  | -3.09682400 |
| C    | -2.65558400 | 3.64142300  | -0.22415300 |
| H    | -1.19089600 | 4.60403700  | 1.05705500  |
| C    | -3.14448300 | 3.52326200  | -1.52493700 |
| H    | -2.94438600 | 4.17692900  | -3.57407000 |
| H    | -3.07592800 | 3.03925400  | 0.57640200  |
| H    | -3.95663400 | 2.83411400  | -1.74144000 |
| C    | 1.49364900  | 6.21191500  | -1.97687500 |
| C    | 2.48943700  | 5.23090100  | -1.83974500 |
| C    | 1.38027900  | 6.92411800  | -3.18129100 |
| C    | 3.33511200  | 4.94810300  | -2.91391200 |
| H    | 2.62551400  | 4.71578500  | -0.89134400 |
| C    | 2.23716600  | 6.64107100  | -4.24684400 |
| H    | 0.62441500  | 7.69727300  | -3.29179400 |
| C    | 3.20834200  | 5.64533600  | -4.11706400 |
| H    | 4.10431000  | 4.18962900  | -2.80013200 |
| H    | 2.14127500  | 7.19419800  | -5.17768700 |
| H    | 3.86982000  | 5.42038600  | -4.94973400 |
| C    | 4.87816100  | 7.87796300  | 0.09103900  |
| C    | 4.82878400  | 8.07657400  | -1.29524000 |
| C    | 5.97605400  | 7.20592200  | 0.63967700  |
| C    | 5.85918500  | 7.61416300  | -2.11296000 |
| H    | 3.97958900  | 8.58457000  | -1.74463900 |
| C    | 7.00898800  | 6.74267500  | -0.17711800 |
| H    | 6.02117200  | 7.04211100  | 1.71311500  |

|   |             |             |             |
|---|-------------|-------------|-------------|
| C | 6.95341800  | 6.94759000  | -1.55601800 |
| H | 5.80293300  | 7.76947300  | -3.18666700 |
| H | 7.85255600  | 6.21943500  | 0.26470800  |
| H | 7.75552800  | 6.58713200  | -2.19448100 |
| C | -4.16688600 | 2.87978900  | 4.49434900  |
| C | -2.92926100 | 2.77611400  | 3.83247400  |
| C | -2.64749800 | 1.57601800  | 3.14971600  |
| C | -3.56076500 | 0.52309700  | 3.14114800  |
| C | -4.77948400 | 0.63889100  | 3.81516300  |
| C | -5.07700000 | 1.82244400  | 4.49249100  |
| H | -4.41382000 | 3.79249200  | 5.02868800  |
| H | -1.70530300 | 1.47690500  | 2.62076300  |
| H | -3.31976900 | -0.39066700 | 2.60372800  |
| H | -5.49015200 | -0.18342700 | 3.80911400  |
| H | -6.02152400 | 1.92612100  | 5.02069800  |
| C | 1.01201300  | 5.69459300  | 4.66350100  |
| C | 0.18033500  | 6.00047400  | 5.91367400  |
| C | -1.14188200 | 6.53241400  | 5.37227100  |
| C | -1.26521400 | 6.21565200  | 3.86599300  |
| C | -0.02264600 | 5.28581000  | 3.58165700  |
| H | 1.76675400  | 4.92065400  | 4.82018200  |
| H | 1.54027500  | 6.59046600  | 4.33021800  |
| H | -0.04000300 | 5.08897200  | 6.48748200  |
| H | 0.63357200  | 6.71398700  | 6.61003300  |
| O | 0.42158500  | 5.24749400  | 2.24987300  |
| O | -1.98317300 | 7.12694400  | 6.01667900  |
| C | -1.29723800 | 7.53402800  | 3.08816900  |
| H | -2.12542500 | 8.15715900  | 3.44410900  |
| H | -1.43239500 | 7.34728300  | 2.01886400  |
| H | -0.36797000 | 8.10349700  | 3.21710100  |
| C | -2.50726300 | 5.33460500  | 3.64042800  |
| H | -2.93201900 | 5.47047100  | 2.63456300  |
| H | -3.30224100 | 5.59616700  | 4.34941900  |
| C | -1.98590400 | 3.91774300  | 3.81138400  |
| C | -0.63093900 | 3.88650700  | 3.84573500  |
| C | 0.24252800  | 2.71520600  | 4.08773800  |
| C | 0.00276600  | 1.86429000  | 5.18310900  |
| C | 1.35931400  | 2.45488400  | 3.27074600  |
| C | 0.84065400  | 0.78156900  | 5.44722300  |
| H | -0.84761300 | 2.05998400  | 5.83002300  |
| C | 2.19515700  | 1.36922000  | 3.53926400  |
| H | 1.56534200  | 3.10901200  | 2.43127100  |
| C | 1.94081600  | 0.52750000  | 4.62453100  |
| H | 0.63628200  | 0.13896600  | 6.30019100  |
| H | 3.04881600  | 1.18635500  | 2.89139800  |
| H | 2.59460800  | -0.31646500 | 4.83022000  |
| C | 3.66335100  | 5.09975200  | 2.28497100  |
| C | 4.71284100  | 4.68144400  | 3.30867600  |
| H | 5.07370900  | 5.53191500  | 3.89366600  |
| H | 4.25269100  | 3.96485800  | 3.99993600  |
| H | 5.54498800  | 4.17926800  | 2.80840400  |
| O | 3.00960300  | 6.18605900  | 2.60001100  |
| O | 3.46390600  | 4.41993900  | 1.27254800  |

17

B3LYP SCF energy: -3281.641487 a.u.

B3LYP enthalpy: -3280.633246 a.u.

B3LYP free energy: -3280.796391 a.u.

M06 SCF energy in solution: -3280.622992 a.u.

Cartesian coordinates

| ATOM | X | Y | Z |
|------|---|---|---|
|------|---|---|---|

|    |             |             |             |   |             |             |            |
|----|-------------|-------------|-------------|---|-------------|-------------|------------|
| Ni | 1.59676500  | 6.85501000  | -0.35012300 | H | -4.90194100 | 1.69538300  | 6.93689600 |
| C  | -1.49447100 | 7.91584700  | -3.69444800 | C | 2.35781300  | 4.09577600  | 4.56124700 |
| C  | -0.32428900 | 7.95580500  | -2.92635400 | C | 2.25989800  | 3.84204900  | 6.06868100 |
| C  | 0.31430700  | 9.20336400  | -2.72767600 | C | 1.05595500  | 4.67016900  | 6.52201600 |
| C  | -0.23627900 | 10.36198300 | -3.30163200 | C | 0.32284000  | 5.26658300  | 5.29895800 |
| C  | -1.40224100 | 10.30019400 | -4.05998000 | C | 0.91452900  | 4.42800700  | 4.11124000 |
| C  | -2.03217600 | 9.07388800  | -4.25968800 | H | 2.77739900  | 3.25698400  | 4.00001300 |
| H  | -2.00001500 | 6.96794700  | -3.84271800 | H | 2.97719800  | 4.97634500  | 4.35594000 |
| H  | 0.25690100  | 11.31285700 | -3.14286800 | H | 2.04276500  | 2.78903300  | 6.29283400 |
| H  | -1.81513800 | 11.20858400 | -4.48809500 | H | 3.15331200  | 4.11156800  | 6.64229600 |
| H  | -2.94274400 | 9.01253100  | -4.84878200 | O | 1.00088500  | 5.08283800  | 2.86093600 |
| C  | 1.56673400  | 9.36341200  | -1.96358300 | O | 0.72474800  | 4.84928600  | 7.67672400 |
| O  | 2.16179900  | 10.56146500 | -2.12163600 | C | 0.60362700  | 6.77437200  | 5.27494600 |
| C  | 3.25996200  | 10.61903300 | -1.17559600 | H | 0.27118400  | 7.22342500  | 6.21800000 |
| C  | 3.47444700  | 9.14510300  | -0.77304900 | H | 0.07911800  | 7.25605700  | 4.44829700 |
| H  | 4.11297300  | 11.07115700 | -1.68153700 | H | 1.67392500  | 6.98424400  | 5.15931400 |
| H  | 2.94078500  | 11.24730900 | -0.33762700 | C | -1.16323000 | 4.88887800  | 5.36501600 |
| H  | 3.56870700  | 9.03065400  | 0.30508400  | H | -1.79031000 | 5.57719800  | 4.78031200 |
| N  | 2.18040600  | 8.52697100  | -1.18471600 | H | -1.53027700 | 4.91673600  | 6.39863500 |
| P  | 0.34876500  | 6.42402000  | -2.16177700 | C | -1.18658700 | 3.49598400  | 4.76354500 |
| C  | -1.07584000 | 5.27587600  | -2.09660600 | C | -0.02414500 | 3.20088200  | 4.13353800 |
| C  | -1.07528100 | 4.06168300  | -2.79675000 | C | 0.38338900  | 1.89354200  | 3.57398800 |
| C  | -2.18185100 | 5.61216100  | -1.29714900 | C | 0.10571300  | 0.70331300  | 4.27420300 |
| C  | -2.16837300 | 3.19701400  | -2.70192500 | C | 1.12587600  | 1.79637500  | 2.38196600 |
| H  | -0.22487600 | 3.78409600  | -3.41010300 | C | 0.52855100  | -0.53414800 | 3.79133800 |
| C  | -3.27291900 | 4.74710600  | -1.21281900 | H | -0.44444600 | 0.75624700  | 5.20860300 |
| H  | -2.18844500 | 6.53458500  | -0.72458100 | C | 1.55219100  | 0.55806800  | 1.90243100 |
| C  | -3.26746500 | 3.53736100  | -1.91361700 | H | 1.35346600  | 2.69941900  | 1.83051400 |
| H  | -2.15468400 | 2.25512500  | -3.24297200 | C | 1.25377800  | -0.61413300 | 2.60037200 |
| H  | -4.12028100 | 5.01449000  | -0.58797500 | H | 0.29870600  | -1.43654100 | 4.35292100 |
| H  | -4.11444500 | 2.86130300  | -1.83810300 | H | 2.12213400  | 0.51149700  | 0.97738900 |
| C  | 1.51046500  | 5.71835500  | -3.39911300 | H | 1.58859800  | -1.57813400 | 2.22507200 |
| C  | 2.58778200  | 4.94831900  | -2.92611700 | C | 3.74201300  | 5.93447200  | 1.12212400 |
| C  | 1.34797600  | 5.90813900  | -4.78118800 | C | 4.87667300  | 6.10205300  | 2.12151200 |
| C  | 3.47693200  | 4.36663900  | -3.83247000 | H | 5.82038500  | 6.19914600  | 1.57178000 |
| H  | 2.74804900  | 4.80991000  | -1.85900900 | H | 4.73572800  | 6.98510400  | 2.74883800 |
| C  | 2.24634900  | 5.33013400  | -5.67876500 | H | 4.94527400  | 5.20609400  | 2.74335100 |
| H  | 0.52420700  | 6.50670600  | -5.15901900 | O | 3.01368100  | 6.99619900  | 0.93595300 |
| C  | 3.30883700  | 4.55557600  | -5.20529600 | O | 3.58285000  | 4.85171800  | 0.53486000 |
| H  | 4.30556200  | 3.77314200  | -3.45742700 | C | -2.14632300 | 6.85765200  | 1.97559800 |
| H  | 2.11438800  | 5.48281600  | -6.74653600 | C | -0.74417300 | 6.77226200  | 1.89310000 |
| H  | 4.00510600  | 4.10334100  | -5.90654300 | C | -0.04290500 | 7.99612600  | 1.90317600 |
| C  | 4.67735000  | 8.50208700  | -1.44338100 | C | -0.70244000 | 9.22912100  | 1.94963400 |
| C  | 4.65983900  | 8.10380400  | -2.78557600 | C | -2.09825200 | 9.27853900  | 2.00549700 |
| C  | 5.86746500  | 8.37684900  | -0.71514700 | C | -2.81976300 | 8.08332000  | 2.02921300 |
| C  | 5.81058700  | 7.58997700  | -3.38591100 | H | -2.71820500 | 5.93249700  | 2.01220400 |
| H  | 3.74465100  | 8.17438200  | -3.36618100 | H | 1.04487400  | 7.97892800  | 1.91467600 |
| C  | 7.02030300  | 7.87010100  | -1.31597000 | H | -0.12678200 | 10.15346100 | 1.96587900 |
| H  | 5.88853100  | 8.67287200  | 0.33076600  | H | -2.61446800 | 10.23480800 | 2.05068700 |
| C  | 6.99392300  | 7.47406700  | -2.65463500 | H | -3.90571600 | 8.10579900  | 2.09904400 |
| H  | 5.77746000  | 7.27484000  | -4.42510700 | B | 0.00053700  | 5.31256600  | 1.82993900 |
| H  | 7.93481000  | 7.77740400  | -0.73653700 | O | 0.90437100  | 5.33278300  | 0.47511800 |
| H  | 7.88848500  | 7.07269200  | -3.12281800 | H | 1.72355700  | 4.81778600  | 0.65732100 |
| C  | -3.16478500 | 2.54187800  | 5.98879800  | O | -0.90243200 | 4.20698300  | 1.65613600 |
| C  | -2.42390800 | 2.68669500  | 4.80273100  | H | -1.40520400 | 4.33275700  | 0.83991600 |
| C  | -2.92163000 | 2.09601400  | 3.62630500  |   |             |             |            |
| C  | -4.10944700 | 1.36699900  | 3.64516600  |   |             |             |            |
| C  | -4.82666600 | 1.21371800  | 4.83512700  |   |             |             |            |
| C  | -4.34987900 | 1.80539100  | 6.00659900  |   |             |             |            |
| H  | -2.80123200 | 2.99718400  | 6.90631000  |   |             |             |            |
| H  | -2.37008900 | 2.24146100  | 2.70312300  |   |             |             |            |
| H  | -4.48050200 | 0.91914800  | 2.72606700  |   |             |             |            |
| H  | -5.75190100 | 0.64285800  | 4.84812400  |   |             |             |            |

### 18-ts

B3LYP SCF energy: -3281.625816 a.u.

B3LYP enthalpy: -3280.619653 a.u.

B3LYP free energy: -3280.779567 a.u.

M06 SCF energy in solution: -3280.607769 a.u.

Imaginary frequency: -36.78 cm<sup>-1</sup>

## Cartesian coordinates

| ATOM | X           | Y           | Z           |
|------|-------------|-------------|-------------|
| Ni   | -1.23785800 | -0.14378600 | 0.37655000  |
| C    | -5.73175200 | 0.53873500  | 1.17734600  |
| C    | -4.37371500 | 0.84412900  | 1.02445700  |
| C    | -3.80801800 | 1.82438100  | 1.87130600  |
| C    | -4.61002700 | 2.46290200  | 2.83171300  |
| C    | -5.95821900 | 2.14399600  | 2.96575700  |
| C    | -6.52145500 | 1.17960600  | 2.13414400  |
| H    | -6.17987700 | -0.22558500 | 0.55225600  |
| H    | -4.16110800 | 3.20821400  | 3.47660100  |
| H    | -6.55974700 | 2.64421500  | 3.71889900  |
| H    | -7.57101600 | 0.91548300  | 2.22906800  |
| C    | -2.39711600 | 2.23898400  | 1.79424700  |
| O    | -2.08900600 | 3.34340000  | 2.50793800  |
| C    | -0.64734100 | 3.49192300  | 2.45337200  |
| C    | -0.21584600 | 2.54573300  | 1.30813800  |
| H    | -0.42696000 | 4.54318600  | 2.26522700  |
| H    | -0.24533200 | 3.19122500  | 3.42592500  |
| H    | 0.59514600  | 1.88800200  | 1.61808500  |
| N    | -1.42940100 | 1.70436100  | 1.12771600  |
| P    | -3.38037600 | -0.02436700 | -0.27773400 |
| C    | -4.31587200 | -1.58771600 | -0.49181700 |
| C    | -5.03309600 | -1.90532300 | -1.65287200 |
| C    | -4.30758500 | -2.48678700 | 0.58969400  |
| C    | -5.75615900 | -3.09887100 | -1.72444100 |
| H    | -5.03227900 | -1.22837500 | -2.50076500 |
| C    | -5.04099700 | -3.67024500 | 0.51255400  |
| H    | -3.72090800 | -2.25186200 | 1.47498400  |
| C    | -5.76800000 | -3.97761100 | -0.64068400 |
| H    | -6.31025300 | -3.33741100 | -2.62838200 |
| H    | -5.03760300 | -4.35828800 | 1.35375600  |
| H    | -6.33696400 | -4.90201000 | -0.69610800 |
| C    | -3.64820000 | 0.99776000  | -1.78409300 |
| C    | -2.52964800 | 1.36867900  | -2.54641200 |
| C    | -4.92325300 | 1.44000900  | -2.17784500 |
| C    | -2.68889900 | 2.14726800  | -3.69558800 |
| H    | -1.53480700 | 1.06022600  | -2.23921300 |
| C    | -5.07710700 | 2.21633300  | -3.32560100 |
| H    | -5.79743100 | 1.18434200  | -1.58648500 |
| C    | -3.95966200 | 2.56724400  | -4.08883600 |
| H    | -1.81425600 | 2.42747300  | -4.27540000 |
| H    | -6.06778000 | 2.55043200  | -3.62183900 |
| H    | -4.08159400 | 3.17252900  | -4.98314000 |
| C    | 0.19884400  | 3.26944800  | 0.03837400  |
| C    | -0.72440600 | 3.96227300  | -0.75562200 |
| C    | 1.55428700  | 3.30577100  | -0.31181400 |
| C    | -0.29728300 | 4.67310500  | -1.87809600 |
| H    | -1.78175000 | 3.94225200  | -0.50555000 |
| C    | 1.98474800  | 4.01717000  | -1.43432000 |
| H    | 2.28446000  | 2.78160600  | 0.29873100  |
| C    | 1.05721100  | 4.70214300  | -2.22085000 |
| H    | -1.02522500 | 5.20318700  | -2.48658300 |
| H    | 3.04120300  | 4.02886200  | -1.68678700 |
| H    | 1.38634200  | 5.25566600  | -3.09615700 |
| C    | 5.96456800  | 1.95452700  | -1.51226500 |
| C    | 5.14145600  | 1.35976500  | -0.53626000 |
| C    | 4.90190800  | 2.09319500  | 0.64506800  |
| C    | 5.46891600  | 3.35024200  | 0.84316800  |
| C    | 6.29303200  | 3.91778100  | -0.13320100 |
| C    | 6.53697700  | 3.21169500  | -1.31173200 |
| H    | 6.17103300  | 1.42306300  | -2.43545600 |

|   |             |             |             |
|---|-------------|-------------|-------------|
| H | 4.26517700  | 1.66635600  | 1.41258800  |
| H | 5.26434100  | 3.89073800  | 1.76408000  |
| H | 6.73634500  | 4.89763200  | 0.02341400  |
| H | 7.17613900  | 3.63776400  | -2.08102400 |
| C | 3.79339000  | -3.43826500 | -0.17807500 |
| C | 5.10988200  | -3.63339900 | -0.93325700 |
| C | 4.98414100  | -2.73494000 | -2.16245500 |
| C | 3.72494800  | -1.84049600 | -2.05619600 |
| C | 3.30448800  | -2.01848700 | -0.55768600 |
| H | 3.88199800  | -3.56278300 | 0.90387800  |
| H | 3.03329200  | -4.14479100 | -0.52977100 |
| H | 5.97381600  | -3.28237800 | -0.35199600 |
| H | 5.32534900  | -4.66602500 | -1.22727200 |
| O | 1.92538500  | -1.97606300 | -0.24264300 |
| O | 5.75506800  | -2.71775100 | -3.10043200 |
| C | 2.71576700  | -2.31866900 | -3.10886500 |
| H | 3.18369500  | -2.29351700 | -4.09970500 |
| H | 1.83864400  | -1.66990400 | -3.10890800 |
| H | 2.38600500  | -3.34624600 | -2.91619200 |
| C | 4.14945000  | -0.37061200 | -2.20399900 |
| H | 3.33540200  | 0.24554600  | -2.60261300 |
| H | 4.99443800  | -0.29078200 | -2.89819800 |
| C | 4.50761200  | 0.04475200  | -0.78512700 |
| C | 4.11619400  | -0.89149900 | 0.12041100  |
| C | 4.44672900  | -0.96089600 | 1.56357900  |
| C | 5.76374800  | -0.71964200 | 2.00366900  |
| C | 3.49107200  | -1.34777000 | 2.52122000  |
| C | 6.10243900  | -0.82725100 | 3.35115700  |
| H | 6.52458200  | -0.44969900 | 1.27719400  |
| C | 3.83128700  | -1.44925100 | 3.87103600  |
| H | 2.48014700  | -1.57799900 | 2.21345800  |
| C | 5.13501700  | -1.18603100 | 4.29426500  |
| H | 7.12650400  | -0.63807400 | 3.66402300  |
| H | 3.06323600  | -1.73710400 | 4.58378600  |
| H | 5.39972600  | -1.26864100 | 5.34552100  |
| C | -1.09306100 | -1.50937700 | 3.19555900  |
| C | -1.59784400 | -2.14479900 | 4.49239800  |
| H | -2.43540200 | -1.57070200 | 4.90032900  |
| H | -1.96718200 | -3.15543700 | 4.27651200  |
| H | -0.79542800 | -2.22065100 | 5.22986200  |
| O | -1.97062500 | -1.07016300 | 2.38965900  |
| O | 0.15779400  | -1.49468700 | 3.00432600  |
| C | -1.00134800 | -1.86735700 | -2.12617000 |
| C | -0.52529000 | -1.84787900 | -0.79205900 |
| C | -0.79033200 | -2.99178600 | 0.00322000  |
| C | -1.45973600 | -4.09831800 | -0.51182000 |
| C | -1.89964500 | -4.08884800 | -1.83975300 |
| C | -1.67211700 | -2.97159700 | -2.64919900 |
| H | -0.77637600 | -1.02052400 | -2.76674000 |
| H | -0.41353300 | -3.01576100 | 1.02093800  |
| H | -1.63478200 | -4.97182400 | 0.11122500  |
| H | -2.41910000 | -4.95414800 | -2.24445400 |
| H | -2.00561500 | -2.97238800 | -3.68418700 |
| B | 0.92884000  | -0.95196900 | -0.45871300 |
| O | 0.60309500  | -0.19493400 | 0.80660800  |
| H | 0.55705500  | -0.76059700 | 1.66190100  |
| O | 1.10872300  | 0.00975400  | -1.52100500 |
| H | 1.48152700  | 0.82492400  | -1.15582400 |

**19-ts**

B3LYP SCF energy: -2644.652641 a.u.

B3LYP enthalpy: -2643.839244 a.u.

B3LYP free energy: -2643.969718 a.u.

M06 SCF energy in solution: -2643.825797 a.u.  
Imaginary frequency: -242.71 cm<sup>-1</sup>

Cartesian coordinates

| ATOM | X           | Y           | Z           |
|------|-------------|-------------|-------------|
| Ni   | -0.05052800 | -0.53527200 | -0.10504200 |
| C    | -3.72624900 | -2.01475300 | 1.90606400  |
| C    | -2.71333700 | -1.10070800 | 1.59914800  |
| C    | -1.96847900 | -0.53160200 | 2.66393700  |
| C    | -2.26236000 | -0.88620700 | 3.98948600  |
| C    | -3.26912600 | -1.80805500 | 4.27255800  |
| C    | -4.00257200 | -2.37051000 | 3.23052400  |
| H    | -4.30418700 | -2.46046100 | 1.10355600  |
| H    | -1.69530700 | -0.43514200 | 4.79560000  |
| H    | -3.47766500 | -2.07997200 | 5.30252900  |
| H    | -4.79212100 | -3.08610500 | 3.44021700  |
| C    | -0.91899500 | 0.48057200  | 2.44550500  |
| O    | -0.65497500 | 1.27033800  | 3.49968300  |
| C    | 0.49244500  | 2.08734600  | 3.13442200  |
| C    | 0.51544900  | 2.00786400  | 1.59536900  |
| H    | 0.32496000  | 3.08956000  | 3.52629000  |
| H    | 1.37553900  | 1.64083700  | 3.60316400  |
| H    | 1.52963100  | 1.87661500  | 1.21992200  |
| N    | -0.24045300 | 0.73106100  | 1.36625200  |
| P    | -2.32883700 | -0.66073800 | -0.15340000 |
| C    | -3.11931800 | -1.95986200 | -1.17264400 |
| C    | -4.22455100 | -1.68245900 | -1.99296400 |
| C    | -2.59340400 | -3.26384100 | -1.14564900 |
| C    | -4.79551400 | -2.69454800 | -2.76687400 |
| H    | -4.64364600 | -0.68289500 | -2.02865500 |
| C    | -3.17465800 | -4.27129700 | -1.91345600 |
| H    | -1.72917100 | -3.48759100 | -0.53181700 |
| C    | -4.27448900 | -3.98842000 | -2.72754100 |
| H    | -5.65046400 | -2.46893000 | -3.39760100 |
| H    | -2.76423800 | -5.27654900 | -1.88141800 |
| H    | -4.72213100 | -4.77402800 | -3.32939100 |
| C    | -3.26007300 | 0.87531300  | -0.50489600 |
| C    | -2.80678900 | 1.69841100  | -1.54790000 |
| C    | -4.44178600 | 1.20873600  | 0.17501500  |
| C    | -3.53669600 | 2.82769200  | -1.91799300 |
| H    | -1.88468100 | 1.45751400  | -2.07000400 |
| C    | -5.16335900 | 2.34546500  | -0.19296600 |
| H    | -4.80569800 | 0.58084900  | 0.98292600  |
| C    | -4.71546700 | 3.15107600  | -1.24233800 |
| H    | -3.18031500 | 3.45829000  | -2.72687000 |
| H    | -6.07869700 | 2.59627500  | 0.33547100  |
| H    | -5.28337900 | 4.03075000  | -1.53151900 |
| C    | -0.12731300 | 3.20759700  | 0.91529100  |
| C    | -1.37674100 | 3.69424800  | 1.33190000  |
| C    | 0.56064900  | 3.88682200  | -0.09591200 |
| C    | -1.91942600 | 4.83859700  | 0.75076400  |
| H    | -1.92889000 | 3.18981400  | 2.12079500  |
| C    | 0.01513700  | 5.03231300  | -0.68084500 |
| H    | 1.53237000  | 3.52972800  | -0.42218800 |
| C    | -1.22389300 | 5.51198600  | -0.25763000 |
| H    | -2.88373700 | 5.20712500  | 1.08800900  |
| H    | 0.56642000  | 5.55060500  | -1.46018200 |
| H    | -1.64446900 | 6.40868500  | -0.70402800 |
| C    | 1.67865800  | 1.03223400  | -2.34240400 |
| C    | 2.74079100  | 1.15351700  | -1.41758400 |
| C    | 3.62473200  | 2.24039600  | -1.59131500 |
| C    | 3.46811400  | 3.14545800  | -2.64174100 |

|   |            |             |             |
|---|------------|-------------|-------------|
| C | 2.42451000 | 2.99280100  | -3.55447200 |
| C | 1.52941900 | 1.93077200  | -3.39526700 |
| H | 0.96001600 | 0.22544400  | -2.24820900 |
| H | 4.44039900 | 2.38674600  | -0.89360400 |
| H | 4.16832200 | 3.96955400  | -2.74458300 |
| H | 2.30684500 | 3.69113900  | -4.37796700 |
| H | 0.71123500 | 1.79862900  | -4.09800000 |
| C | 2.33291200 | -2.32301400 | -2.35899800 |
| C | 3.62043200 | -2.97299800 | -1.83366400 |
| C | 3.23363500 | -3.63953500 | -0.51248200 |
| C | 1.92545400 | -3.03022500 | 0.03127100  |
| C | 1.41145000 | -2.15551600 | -1.15470500 |
| H | 2.48466000 | -1.38971800 | -2.90625600 |
| H | 1.79480000 | -3.00027100 | -3.03799200 |
| H | 4.39261700 | -2.22463600 | -1.61442700 |
| H | 4.06582500 | -3.70377800 | -2.51396500 |
| O | 0.15567300 | -1.89481300 | -1.35839600 |
| O | 3.84979200 | -4.51988600 | 0.04164600  |
| C | 0.97467000 | -4.11230500 | 0.54059400  |
| H | 1.49055400 | -4.70427500 | 1.30308700  |
| H | 0.07721200 | -3.67114000 | 0.98620500  |
| H | 0.66664800 | -4.79287300 | -0.26064900 |
| C | 2.24559300 | -1.89541700 | 1.04303800  |
| H | 1.53987200 | -1.92487000 | 1.88269100  |
| H | 3.25419900 | -1.95083800 | 1.46441400  |
| C | 1.99323600 | -0.72594700 | 0.09842800  |
| C | 2.93042400 | 0.20126700  | -0.28813200 |
| C | 4.23743400 | 0.26606200  | 0.44748100  |
| C | 4.27649200 | 0.44352400  | 1.84035900  |
| C | 5.45732200 | 0.10990100  | -0.23701300 |
| C | 5.49004000 | 0.46850800  | 2.52827500  |
| H | 3.34607000 | 0.56360000  | 2.38920600  |
| C | 6.66985100 | 0.11739900  | 0.45196900  |
| H | 5.45498100 | -0.01745200 | -1.31598900 |
| C | 6.69077400 | 0.30090000  | 1.83639200  |
| H | 5.49721100 | 0.61553500  | 3.60456600  |
| H | 7.59884800 | -0.01748900 | -0.09436400 |
| H | 7.63568600 | 0.31292400  | 2.37139700  |

20

B3LYP SCF energy: -2644.659747 a.u.

B3LYP enthalpy: -2643.844213 a.u.

B3LYP free energy: -2643.974055 a.u.

M06 SCF energy in solution: -2643.831637 a.u.

Cartesian coordinates

| ATOM | X           | Y           | Z           |
|------|-------------|-------------|-------------|
| Ni   | 0.00566600  | -0.46192300 | -0.10807400 |
| C    | -3.49235900 | -2.07935400 | 1.98101500  |
| C    | -2.53818400 | -1.10934500 | 1.65902500  |
| C    | -1.81791300 | -0.48709900 | 2.71133800  |
| C    | -2.08322300 | -0.83966100 | 4.04270400  |
| C    | -3.03323300 | -1.81526800 | 4.34247400  |
| C    | -3.73704400 | -2.43444400 | 3.31194700  |
| H    | -4.05054900 | -2.56529200 | 1.18809400  |
| H    | -1.53678300 | -0.34759600 | 4.83920600  |
| H    | -3.22005300 | -2.08646800 | 5.37674400  |
| H    | -4.48070700 | -3.19344500 | 3.53580100  |
| C    | -0.81622700 | 0.56341500  | 2.46427500  |
| O    | -0.57104300 | 1.39104200  | 3.49018500  |
| C    | 0.53160700  | 2.25146200  | 3.08337900  |
| C    | 0.55249800  | 2.11675000  | 1.54667100  |

|   |             |             |             |
|---|-------------|-------------|-------------|
| H | 0.31531500  | 3.25777800  | 3.43874500  |
| H | 1.43962700  | 1.87110700  | 3.56050500  |
| H | 1.57228000  | 2.00605600  | 1.17725900  |
| N | -0.16059300 | 0.80448100  | 1.36817300  |
| P | -2.21087800 | -0.65643100 | -0.09800400 |
| C | -3.01489400 | -1.92705800 | -1.13258700 |
| C | -4.19847100 | -1.64128600 | -1.83524000 |
| C | -2.45361300 | -3.21303200 | -1.21818200 |
| C | -4.81237200 | -2.63167000 | -2.60258200 |
| H | -4.64347600 | -0.65405200 | -1.78520400 |
| C | -3.07810100 | -4.19766900 | -1.98186600 |
| H | -1.52630500 | -3.43199800 | -0.70727500 |
| C | -4.25567400 | -3.90963200 | -2.67596100 |
| H | -5.72670400 | -2.40168400 | -3.14163600 |
| H | -2.63825100 | -5.18897900 | -2.04206500 |
| H | -4.73582500 | -4.67815200 | -3.27483800 |
| C | -3.13590000 | 0.88831600  | -0.41565400 |
| C | -2.76091900 | 1.67174600  | -1.51854500 |
| C | -4.26380700 | 1.24553000  | 0.33904500  |
| C | -3.51853400 | 2.78725400  | -1.87260100 |
| H | -1.88255300 | 1.40800100  | -2.10125200 |
| C | -5.01310300 | 2.36868400  | -0.01583900 |
| H | -4.56868000 | 0.64405800  | 1.19025300  |
| C | -4.64589500 | 3.13465400  | -1.12408300 |
| H | -3.22499200 | 3.38772000  | -2.72818200 |
| H | -5.88852900 | 2.63755200  | 0.56833300  |
| H | -5.23661900 | 4.00233200  | -1.40346500 |
| C | -0.12076300 | 3.27209400  | 0.82220300  |
| C | -1.33964200 | 3.80113100  | 1.27560500  |
| C | 0.51475400  | 3.87344700  | -0.26975600 |
| C | -1.90209800 | 4.91390900  | 0.65353500  |
| H | -1.85077900 | 3.35650500  | 2.12599100  |
| C | -0.05188100 | 4.98594200  | -0.89649400 |
| H | 1.46449100  | 3.48489500  | -0.62427300 |
| C | -1.25808300 | 5.51106200  | -0.43399900 |
| H | -2.84030000 | 5.31864800  | 1.02140600  |
| H | 0.45974000  | 5.44608200  | -1.73696600 |
| H | -1.69227200 | 6.38511900  | -0.91116400 |
| C | 1.78594700  | 0.92602700  | -2.50364600 |
| C | 2.79702600  | 1.07542500  | -1.52569100 |
| C | 3.63201000  | 2.20896900  | -1.62974200 |
| C | 3.50018300  | 3.11573800  | -2.68240900 |
| C | 2.51869500  | 2.92892100  | -3.65506800 |
| C | 1.65710500  | 1.83264300  | -3.55172100 |
| H | 1.08300100  | 0.10311000  | -2.44470300 |
| H | 4.39419400  | 2.39149500  | -0.88289000 |
| H | 4.16917900  | 3.96979700  | -2.73648400 |
| H | 2.41800900  | 3.63119900  | -4.47752000 |
| H | 0.87695900  | 1.68153300  | -4.29269100 |
| C | 2.23067100  | -2.38287400 | -2.56746700 |
| C | 3.44606400  | -3.25334300 | -2.21334300 |
| C | 3.01813900  | -4.02558200 | -0.96634900 |
| C | 1.93069000  | -3.23650600 | -0.22680600 |
| C | 1.52652400  | -2.06765700 | -1.22486100 |
| H | 2.48901600  | -1.49271800 | -3.14433400 |
| H | 1.50747300  | -2.95969500 | -3.15801100 |
| H | 4.31593400  | -2.63323700 | -1.95162800 |
| H | 3.76407500  | -3.93648100 | -3.00511000 |
| O | 0.19129600  | -1.73963800 | -1.37121700 |
| O | 3.44444700  | -5.10366000 | -0.61543900 |
| C | 0.87119800  | -4.14574500 | 0.37144600  |
| H | 1.34870000  | -4.86169000 | 1.04870700  |
| H | 0.12688100  | -3.57383000 | 0.93680400  |

|   |            |             |             |
|---|------------|-------------|-------------|
| H | 0.35295700 | -4.72215100 | -0.40253800 |
| C | 2.56763600 | -2.19467700 | 0.74597800  |
| H | 2.01415700 | -2.12824100 | 1.69043100  |
| H | 3.62437000 | -2.34107200 | 0.99616200  |
| C | 2.28560800 | -1.07446800 | -0.25072200 |
| C | 2.97219200 | 0.10534300  | -0.40976700 |
| C | 4.05006600 | 0.36416100  | 0.60502800  |
| C | 3.76481600 | 0.43730400  | 1.97740500  |
| C | 5.39722800 | 0.42400900  | 0.20277400  |
| C | 4.78352900 | 0.60273500  | 2.91676600  |
| H | 2.73739800 | 0.33995900  | 2.31329400  |
| C | 6.41660500 | 0.57734600  | 1.14271900  |
| H | 5.64919000 | 0.33404900  | -0.84984800 |
| C | 6.11373100 | 0.67822600  | 2.50213100  |
| H | 4.53846900 | 0.66116200  | 3.97375400  |
| H | 7.44997500 | 0.61305000  | 0.81018100  |
| H | 6.90840400 | 0.80185900  | 3.23174000  |

## 21-ts

B3LYP SCF energy: -2644.632856 a.u.

B3LYP enthalpy: -2643.818815 a.u.

B3LYP free energy: -2643.95055 a.u.

M06 SCF energy in solution: -2643.791552 a.u.

Imaginary frequency: -178.92 cm<sup>-1</sup>

## Cartesian coordinates

| ATOM | X           | Y           | Z           |
|------|-------------|-------------|-------------|
| C    | -2.93519300 | 3.23072600  | -1.43801500 |
| C    | -2.64887000 | 1.89389800  | -1.13834800 |
| C    | -3.09794400 | 0.88291000  | -2.02232700 |
| C    | -3.80882900 | 1.24388800  | -3.17906400 |
| C    | -4.07300900 | 2.58127600  | -3.46762900 |
| C    | -3.64244400 | 3.57596200  | -2.59289700 |
| H    | -2.59522400 | 4.01347000  | -0.76911900 |
| H    | -4.15442900 | 0.46715900  | -3.85006200 |
| H    | -4.61641800 | 2.83963000  | -4.37107100 |
| H    | -3.84979300 | 4.62084700  | -2.80371100 |
| C    | -2.91945600 | -0.56122500 | -1.76561600 |
| O    | -3.75149100 | -1.33962600 | -2.46837600 |
| C    | -3.34075300 | -2.71464900 | -2.24173600 |
| C    | -2.51631300 | -2.62749100 | -0.94535200 |
| H    | -4.24080600 | -3.32246300 | -2.16041800 |
| H    | -2.74183000 | -3.02796000 | -3.10278100 |
| H    | -1.62651700 | -3.24740000 | -1.04035400 |
| N    | -2.10833600 | -1.17646900 | -0.94822600 |
| P    | -1.67121400 | 1.46272900  | 0.35528800  |
| C    | -0.79592200 | 2.99648400  | 0.81843800  |
| C    | -1.06652100 | 3.65362900  | 2.02915200  |
| C    | 0.14264900  | 3.54500400  | -0.07366900 |
| C    | -0.41682000 | 4.85054300  | 2.33609200  |
| H    | -1.78565200 | 3.24138600  | 2.72843700  |
| C    | 0.76892200  | 4.75201400  | 0.23120700  |
| H    | 0.38100900  | 3.03326600  | -0.99976400 |
| C    | 0.49375700  | 5.40505500  | 1.43611700  |
| H    | -0.63224700 | 5.35196700  | 3.27498000  |
| H    | 1.47302300  | 5.18230500  | -0.47428400 |
| H    | 0.98860300  | 6.34283200  | 1.67145900  |
| C    | -2.86232600 | 1.12139000  | 1.69953600  |
| C    | -2.42344200 | 0.37125400  | 2.80255800  |
| C    | -4.16991800 | 1.63152600  | 1.68440900  |
| C    | -3.27678500 | 0.14698500  | 3.88236000  |
| H    | -1.41546800 | -0.03484000 | 2.81807300  |

|    |             |             |             |
|----|-------------|-------------|-------------|
| C  | -5.02291200 | 1.39551900  | 2.76407300  |
| H  | -4.52224400 | 2.21563600  | 0.83966100  |
| C  | -4.57683000 | 0.65811200  | 3.86349100  |
| H  | -2.92918100 | -0.43112200 | 4.73327800  |
| H  | -6.03304800 | 1.79445100  | 2.74797300  |
| H  | -5.24135100 | 0.48197700  | 4.70439700  |
| C  | -3.30011200 | -3.04024700 | 0.29022200  |
| C  | -4.31830600 | -2.24800700 | 0.83582800  |
| C  | -3.06199700 | -4.31026000 | 0.83555600  |
| C  | -5.08198300 | -2.71742700 | 1.90530600  |
| H  | -4.52095400 | -1.25945900 | 0.43467800  |
| C  | -3.82699400 | -4.78060800 | 1.90387700  |
| H  | -2.27750600 | -4.93568400 | 0.41550200  |
| C  | -4.83957800 | -3.98413300 | 2.44131600  |
| H  | -5.86707800 | -2.09125400 | 2.31866600  |
| H  | -3.63159300 | -5.76737500 | 2.31372200  |
| H  | -5.43711500 | -4.34858300 | 3.27198000  |
| C  | 3.89049500  | 2.20273900  | -0.21763100 |
| C  | 4.65427200  | 1.07803900  | -0.57200300 |
| C  | 5.77802900  | 1.26133200  | -1.40066800 |
| C  | 6.11057200  | 2.52393800  | -1.88488200 |
| C  | 5.34399500  | 3.63600000  | -1.52616900 |
| C  | 4.24129900  | 3.46998900  | -0.68798400 |
| H  | 3.04190700  | 2.08666400  | 0.44775200  |
| H  | 6.39201900  | 0.40453700  | -1.66237300 |
| H  | 6.97581400  | 2.64250200  | -2.53104600 |
| H  | 5.61455800  | 4.62474500  | -1.88608800 |
| H  | 3.66050800  | 4.33341800  | -0.37738100 |
| C  | 1.75900600  | -0.54884600 | -2.20737800 |
| C  | 1.84136400  | -2.05949400 | -2.49975800 |
| C  | 1.01744300  | -2.78858400 | -1.43749500 |
| C  | 1.17833900  | -2.21328600 | -0.07094700 |
| C  | 1.83834600  | -0.32637100 | -0.69123100 |
| H  | 2.57594600  | 0.00641200  | -2.68681400 |
| H  | 0.81128400  | -0.13840500 | -2.57883300 |
| H  | 2.88329500  | -2.40067800 | -2.43779500 |
| H  | 1.47114200  | -2.31937700 | -3.49423000 |
| O  | 0.25698800  | -3.71070600 | -1.71031700 |
| C  | 0.27606500  | -2.70737500 | 1.04652500  |
| H  | 0.60588300  | -3.71703900 | 1.33846100  |
| H  | 0.38792900  | -2.07359800 | 1.93419000  |
| H  | -0.78195400 | -2.77612200 | 0.81006100  |
| C  | 2.65629100  | -2.17684200 | 0.42842200  |
| H  | 2.66453100  | -2.21351500 | 1.52500400  |
| H  | 3.22896400  | -3.04790700 | 0.08801900  |
| C  | 3.11552900  | -0.84144300 | -0.07045700 |
| C  | 4.34448300  | -0.28753400 | -0.06223100 |
| C  | 5.50234900  | -1.06921900 | 0.48144600  |
| C  | 6.23599700  | -0.56519700 | 1.56781400  |
| C  | 5.89338500  | -2.29235300 | -0.08467300 |
| C  | 7.31261600  | -1.28047100 | 2.09082700  |
| H  | 5.95674600  | 0.39067000  | 2.00245400  |
| C  | 6.97869900  | -3.00286000 | 0.43122700  |
| H  | 5.35940500  | -2.67827900 | -0.94919200 |
| C  | 7.68674600  | -2.50189100 | 1.52479900  |
| H  | 7.86406400  | -0.88093400 | 2.93734300  |
| H  | 7.27396300  | -3.94323700 | -0.02593400 |
| H  | 8.53030700  | -3.05473400 | 1.92813600  |
| Ni | -0.45494800 | -0.31242100 | -0.24224500 |
| O  | 1.13261100  | 0.62245300  | -0.12676700 |

22

B3LYP SCF energy: -2644.690932 a.u.

B3LYP enthalpy: -2643.874621 a.u.

B3LYP free energy: -2644.00839 a.u.

M06 SCF energy in solution: -2643.857466 a.u.

#### Cartesian coordinates

| ATOM | X           | Y           | Z           |
|------|-------------|-------------|-------------|
| C    | -3.59817700 | 2.94259200  | -1.56210200 |
| C    | -3.21397800 | 1.70736900  | -1.02489000 |
| C    | -3.95244700 | 0.55512300  | -1.39272000 |
| C    | -5.04012200 | 0.67769100  | -2.27381400 |
| C    | -5.40137500 | 1.91608800  | -2.79785500 |
| C    | -4.67808600 | 3.05152700  | -2.44135600 |
| H    | -3.04071600 | 3.83583400  | -1.30332600 |
| H    | -5.59736200 | -0.21000800 | -2.54734100 |
| H    | -6.24172400 | 1.98873600  | -3.48102800 |
| H    | -4.94708000 | 4.02376800  | -2.84346200 |
| C    | -3.64888700 | -0.79780900 | -0.89410000 |
| O    | -4.59445000 | -1.72291000 | -1.11713800 |
| C    | -4.05537400 | -3.00991500 | -0.70463100 |
| C    | -2.77691700 | -2.65113000 | 0.08837300  |
| H    | -4.81835100 | -3.51367600 | -0.11141400 |
| H    | -3.84876600 | -3.58358700 | -1.61211800 |
| H    | -1.91362600 | -3.20030600 | -0.28808500 |
| N    | -2.58877100 | -1.21136800 | -0.27664000 |
| P    | -1.82823900 | 1.63850700  | 0.20138800  |
| C    | -0.78900800 | 3.09056900  | -0.20983700 |
| C    | -0.34278100 | 3.97681700  | 0.78145300  |
| C    | -0.33224100 | 3.25239100  | -1.53085600 |
| C    | 0.53538000  | 5.01352600  | 0.45495800  |
| H    | -0.67123600 | 3.86278600  | 1.80906000  |
| C    | 0.53378900  | 4.29618800  | -1.85336500 |
| H    | -0.66228200 | 2.57300700  | -2.31271400 |
| C    | 0.97059900  | 5.17774100  | -0.85999300 |
| H    | 0.88338300  | 5.68374100  | 1.23474400  |
| H    | 0.86885500  | 4.41987300  | -2.87920400 |
| H    | 1.64969600  | 5.98684000  | -1.11209500 |
| C    | -2.62803800 | 1.99291200  | 1.81438300  |
| C    | -2.52309000 | 1.05813700  | 2.85491200  |
| C    | -3.36821700 | 3.17124400  | 2.01881600  |
| C    | -3.14008800 | 1.30145600  | 4.08437400  |
| H    | -1.97133200 | 0.13593600  | 2.70708300  |
| C    | -3.97895500 | 3.41080100  | 3.24783300  |
| H    | -3.46776100 | 3.90214700  | 1.22214300  |
| C    | -3.86423700 | 2.47682900  | 4.28252300  |
| H    | -3.05501400 | 0.56785900  | 4.88033600  |
| H    | -4.54680100 | 4.32429500  | 3.39814900  |
| H    | -4.34295000 | 2.66659900  | 5.23887300  |
| C    | -2.87488900 | -2.84861500 | 1.59121400  |
| C    | -3.97059700 | -2.35712200 | 2.31621500  |
| C    | -1.86867500 | -3.54792800 | 2.26925200  |
| C    | -4.05933500 | -2.56620400 | 3.69250400  |
| H    | -4.76475900 | -1.81463500 | 1.80766100  |
| C    | -1.95615600 | -3.75673200 | 3.64806100  |
| H    | -1.01582500 | -3.93073000 | 1.71532800  |
| C    | -3.05139200 | -3.26700800 | 4.36154500  |
| H    | -4.91878800 | -2.19039200 | 4.24045800  |
| H    | -1.17349500 | -4.30888000 | 4.16039300  |
| H    | -3.12524000 | -3.43771000 | 5.43177500  |
| Ni   | -0.88709400 | -0.37251700 | 0.10194100  |
| C    | 2.98262800  | 2.51415900  | 3.34851400  |
| C    | 3.80315200  | 2.81175200  | 2.24812400  |
| C    | 4.21646800  | 4.14285700  | 2.06309000  |



|   |            |             |             |
|---|------------|-------------|-------------|
| C | 3.79209300 | 5.14914600  | 2.92942200  |
| C | 2.96654700 | 4.84116500  | 4.01495800  |
| C | 2.57010600 | 3.51942100  | 4.22593000  |
| H | 2.69361900 | 1.48447700  | 3.53408500  |
| H | 4.87733600 | 4.38322200  | 1.23535000  |
| H | 4.12093500 | 6.17225100  | 2.76816800  |
| H | 2.65217600 | 5.62244200  | 4.70143100  |
| H | 1.95229600 | 3.26572000  | 5.08331100  |
| C | 1.97511100 | -1.29972900 | -1.44654500 |
| C | 3.18422900 | -0.35702600 | -1.61004300 |
| C | 3.92927400 | -0.15490100 | -0.28396300 |
| C | 1.09311200 | -1.11741000 | -0.22847900 |
| H | 1.34852100 | -1.29721200 | -2.34698500 |
| H | 2.34186800 | -2.33019500 | -1.34559200 |
| H | 2.87144600 | 0.60264600  | -2.03498600 |
| H | 3.88766100 | -0.82072400 | -2.30686200 |
| O | 0.14013200 | -1.97560100 | -0.06140400 |
| O | 4.80424900 | -0.93322500 | 0.05125500  |
| C | 0.93356100 | -0.41743100 | 2.20157600  |
| H | 0.46214100 | 0.39072200  | 2.76862400  |
| H | 0.35867600 | -1.33470300 | 2.34327800  |
| H | 1.93216200 | -0.57904000 | 2.63320300  |
| C | 1.93718800 | 1.20469300  | 0.47419500  |
| H | 1.70809200 | 1.60106300  | -0.52203900 |
| H | 1.63459400 | 1.98165300  | 1.17623900  |
| C | 3.44358800 | 0.97606600  | 0.57632700  |
| C | 4.28799500 | 1.75025100  | 1.31147600  |
| C | 5.77359300 | 1.68335700  | 1.17410200  |
| C | 6.58242800 | 1.58267600  | 2.31797300  |
| C | 6.39400600 | 1.79205000  | -0.08070100 |
| C | 7.97080300 | 1.54584700  | 2.20457200  |
| H | 6.11834400 | 1.51901000  | 3.29802300  |
| C | 7.78322100 | 1.77219800  | -0.19260700 |
| H | 5.78248200 | 1.90642000  | -0.97193200 |
| C | 8.57596000 | 1.64129800  | 0.94923600  |
| H | 8.58130700 | 1.44840200  | 3.09786900  |
| H | 8.24651800 | 1.86317600  | -1.17112500 |
| H | 9.65861600 | 1.62281000  | 0.86248500  |
| C | 1.10461900 | -0.04871400 | 0.72993900  |

### 23-ts

B3LYP SCF energy: -3052.908856 a.u.

B3LYP enthalpy: -3051.958627 a.u.

B3LYP free energy: -3052.110154 a.u.

M06 SCF energy in solution: -3051.964731 a.u.

Imaginary frequency: -214.47 cm<sup>-1</sup>

### Cartesian coordinates

| ATOM | X          | Y           | Z           |
|------|------------|-------------|-------------|
| C    | 3.12564700 | -3.33219300 | -2.43073800 |
| C    | 3.07509800 | -2.06153800 | -1.84286400 |
| C    | 3.81993800 | -1.01268400 | -2.42992900 |
| C    | 4.55987800 | -1.25735300 | -3.59989600 |
| C    | 4.57831900 | -2.52219200 | -4.18200200 |
| C    | 3.87156000 | -3.56561000 | -3.58849900 |
| H    | 2.56596600 | -4.14908200 | -1.99002800 |
| H    | 5.12627000 | -0.44940400 | -4.04575700 |
| H    | 5.15016100 | -2.68926000 | -5.08933400 |
| H    | 3.89114500 | -4.56046300 | -4.02332700 |
| C    | 3.94787400 | 0.32663200  | -1.82511300 |
| O    | 4.99428800 | 1.02034600  | -2.29065600 |
| C    | 4.92732400 | 2.34857700  | -1.71463200 |

|    |             |             |             |
|----|-------------|-------------|-------------|
| C  | 3.98101300  | 2.16327000  | -0.51283600 |
| H  | 5.93937300  | 2.64644500  | -1.44340700 |
| H  | 4.52386900  | 3.02027400  | -2.47925000 |
| H  | 3.27218400  | 2.98496200  | -0.46699500 |
| N  | 3.24656900  | 0.91123800  | -0.89287600 |
| P  | 2.03690600  | -1.75519500 | -0.35984200 |
| C  | 0.74976600  | -3.05854000 | -0.44754100 |
| C  | 0.49551300  | -3.89489800 | 0.64946100  |
| C  | 0.01513900  | -3.23802100 | -1.63283300 |
| C  | -0.46785600 | -4.90196300 | 0.55599200  |
| H  | 1.05092200  | -3.77154800 | 1.57259200  |
| C  | -0.93548900 | -4.25329300 | -1.72487800 |
| H  | 0.19915200  | -2.60312700 | -2.49511700 |
| C  | -1.18016500 | -5.08692600 | -0.62914600 |
| H  | -0.65077400 | -5.54784300 | 1.40972400  |
| H  | -1.48163500 | -4.39679500 | -2.65286100 |
| H  | -1.91930100 | -5.87923000 | -0.70316700 |
| C  | 3.04777800  | -2.15009100 | 1.11531200  |
| C  | 2.70242600  | -1.55069200 | 2.33954800  |
| C  | 4.11648600  | -3.05965200 | 1.05890200  |
| C  | 3.41311200  | -1.88058900 | 3.49534400  |
| H  | 1.89242500  | -0.82722400 | 2.39963300  |
| C  | 4.82650200  | -3.37330000 | 2.21827400  |
| H  | 4.39672200  | -3.52408900 | 0.11833800  |
| C  | 4.47190500  | -2.78906400 | 3.43736500  |
| H  | 3.14071300  | -1.41851700 | 4.43957400  |
| H  | 5.65215500  | -4.07735500 | 2.16926500  |
| H  | 5.02230600  | -3.04097700 | 4.33939100  |
| C  | 4.71977100  | 2.05423900  | 0.81249400  |
| C  | 5.29755600  | 0.85966900  | 1.25706200  |
| C  | 4.91890000  | 3.22344200  | 1.56109100  |
| C  | 6.05381000  | 0.83378500  | 2.43085100  |
| H  | 5.15304400  | -0.06070100 | 0.70086300  |
| C  | 5.67923300  | 3.19926900  | 2.73009500  |
| H  | 4.47939500  | 4.15867900  | 1.22430200  |
| C  | 6.24768400  | 2.00164400  | 3.16945900  |
| H  | 6.48893700  | -0.10321700 | 2.76550600  |
| H  | 5.82498400  | 4.11380700  | 3.29789700  |
| H  | 6.83790300  | 1.98017700  | 4.08100800  |
| Ni | 1.46985200  | 0.45010100  | -0.21975800 |
| C  | -4.82636900 | 0.67715100  | 2.17532200  |
| C  | -5.79790600 | 0.15529100  | 1.30501600  |
| C  | -7.03574700 | -0.24524900 | 1.83775300  |
| C  | -7.28064800 | -0.16319400 | 3.20728600  |
| C  | -6.30672000 | 0.35442700  | 4.06553900  |
| C  | -5.08469800 | 0.78196000  | 3.54437300  |
| H  | -3.87471400 | 1.02254600  | 1.78143800  |
| H  | -7.80521000 | -0.62315800 | 1.17068100  |
| H  | -8.23744000 | -0.49189400 | 3.60349400  |
| H  | -6.50471100 | 0.43319100  | 5.13092100  |
| H  | -4.32918500 | 1.20593300  | 4.20060100  |
| C  | -1.63841100 | -0.00511200 | -1.60113300 |
| C  | -2.64157300 | -0.83021800 | -2.42484400 |
| C  | -4.11219200 | -0.51468400 | -2.13115200 |
| C  | -1.46811000 | -0.39673800 | -0.15677800 |
| H  | -0.65253300 | -0.09562100 | -2.08172300 |
| H  | -1.90015400 | 1.06213200  | -1.67948000 |
| H  | -2.44829200 | -1.89777700 | -2.26670700 |
| H  | -2.49953500 | -0.62094700 | -3.48848600 |
| O  | -0.28258700 | 0.11498200  | 0.42598300  |
| O  | -4.83258900 | -0.17489700 | -3.05690200 |
| C  | -1.96677000 | -1.50440900 | 2.03401400  |
| H  | -2.09497500 | -2.58861300 | 2.15101700  |

|   |             |             |             |
|---|-------------|-------------|-------------|
| H | -0.95235500 | -1.23184200 | 2.32545900  |
| H | -2.66338500 | -1.02705300 | 2.73394900  |
| C | -3.68342400 | -1.56631200 | 0.15191800  |
| H | -3.57397900 | -2.52214400 | -0.38285500 |
| H | -4.25617200 | -1.80797500 | 1.04995400  |
| C | -4.52549600 | -0.62111700 | -0.70082400 |
| C | -5.56739400 | 0.09176700  | -0.17382100 |
| C | -6.56790600 | 0.88071400  | -0.95276300 |
| C | -6.80853900 | 2.22252700  | -0.60667900 |
| C | -7.36401300 | 0.29151000  | -1.94814400 |
| C | -7.78400700 | 2.96627000  | -1.26809500 |
| H | -6.22306300 | 2.68353500  | 0.18403100  |
| C | -8.36135500 | 1.02693700  | -2.58653000 |
| H | -7.20173600 | -0.74565700 | -2.21610300 |
| C | -8.56760200 | 2.36812100  | -2.25747500 |
| H | -7.94264200 | 4.00727100  | -1.00018200 |
| H | -8.97368200 | 0.55182900  | -3.34788000 |
| H | -9.33956700 | 2.94167000  | -2.76318200 |
| C | -2.30012100 | -1.10659400 | 0.61902400  |
| C | 0.42457300  | 2.93774200  | -1.06575100 |
| C | 0.83239300  | 2.44533000  | 0.19869800  |
| C | 1.44828400  | 3.37376500  | 1.07111100  |
| C | 1.59158600  | 4.71827600  | 0.73125800  |
| C | 1.17868000  | 5.16920700  | -0.52796700 |
| C | 0.60596900  | 4.27292400  | -1.43484100 |
| H | -0.05619900 | 2.27215400  | -1.77861100 |
| H | 1.77272800  | 3.03120000  | 2.04863500  |
| H | 2.02098300  | 5.41845900  | 1.44348100  |
| H | 1.29317600  | 6.21602100  | -0.79646100 |
| H | 0.28385700  | 4.61877900  | -2.41362000 |
| B | -0.29546400 | 1.35984000  | 1.26756300  |
| O | -1.51471700 | 2.03957600  | 1.40798200  |
| H | -1.86380400 | 2.39961200  | 0.58266900  |
| O | 0.36372200  | 1.06929500  | 2.48390000  |
| H | 0.02320900  | 1.64567100  | 3.18294800  |

24

B3LYP SCF energy: -1138.720231 a.u.

B3LYP enthalpy: -1138.314972 a.u.

B3LYP free energy: -1138.395010 a.u.

M06 SCF energy in solution: -1138.314891 a.u.

Cartesian coordinates

| ATOM | X           | Y           | Z          |
|------|-------------|-------------|------------|
| C    | 10.13362600 | -3.42853100 | 5.04188600 |
| C    | 11.07999300 | -2.73337700 | 4.27192900 |
| C    | 12.35256700 | -2.51066400 | 4.82788800 |
| C    | 12.65423400 | -2.93612900 | 6.12009000 |
| C    | 11.70008100 | -3.62207200 | 6.87603700 |
| C    | 10.44133200 | -3.87328400 | 6.32921100 |
| H    | 9.15166400  | -3.63424500 | 4.62775100 |
| H    | 13.10578000 | -1.99767300 | 4.23703700 |
| H    | 13.63952900 | -2.73947900 | 6.53418800 |
| H    | 11.93921100 | -3.96486900 | 7.87896200 |
| H    | 9.69624200  | -4.42079100 | 6.90026100 |
| C    | 7.01909000  | -2.18797200 | 1.38410500 |
| C    | 7.87514700  | -1.02733300 | 0.85353700 |
| C    | 9.36974100  | -1.12383600 | 1.15458700 |
| C    | 6.75283200  | -2.20373300 | 2.87309700 |
| H    | 6.03266900  | -2.12938700 | 0.90867300 |
| H    | 7.44231900  | -3.15022600 | 1.05560300 |
| H    | 7.48835500  | -0.08208100 | 1.25991000 |

|   |             |             |             |
|---|-------------|-------------|-------------|
| H | 7.78970600  | -0.96448700 | -0.23488500 |
| O | 5.56249400  | -2.85775700 | 3.17015000  |
| O | 10.17942900 | -0.89264000 | 0.27077400  |
| C | 6.96389000  | -1.54768400 | 5.27384500  |
| H | 6.97391000  | -0.50681600 | 5.62589500  |
| H | 5.94571700  | -1.92838300 | 5.37104000  |
| H | 7.61824800  | -2.11036900 | 5.95312800  |
| C | 8.79981500  | -0.90973700 | 3.62026400  |
| H | 8.61569900  | 0.15116700  | 3.38789300  |
| H | 9.32963100  | -0.90346600 | 4.57663100  |
| C | 9.73318100  | -1.48856900 | 2.56352000  |
| C | 10.80072400 | -2.27798100 | 2.87071200  |
| C | 11.79604900 | -2.80654500 | 1.88222800  |
| C | 11.96785800 | -4.19725700 | 1.76871600  |
| C | 12.63576900 | -1.96465700 | 1.13717100  |
| C | 12.92347100 | -4.73235700 | 0.90683900  |
| H | 11.34379800 | -4.86195300 | 2.36039100  |
| C | 13.60998500 | -2.50115700 | 0.29411100  |
| H | 12.51841000 | -0.89117200 | 1.21548200  |
| C | 13.75198300 | -3.88376400 | 0.16883600  |
| H | 13.02767300 | -5.81065800 | 0.81979900  |
| H | 14.25331500 | -1.83329800 | -0.27247900 |
| H | 14.50554800 | -4.29818200 | -0.49565900 |
| C | 7.46128800  | -1.60967500 | 3.84995600  |
| B | 5.54933900  | -4.19198500 | 3.51693200  |
| O | 6.68421000  | -4.96418500 | 3.61015500  |
| H | 7.48201900  | -4.45158500 | 3.41112500  |
| O | 4.32740300  | -4.74322900 | 3.77255600  |
| H | 4.42117900  | -5.67846800 | 4.00213100  |

25-ts

B3LYP SCF energy: -2644.592016 a.u.

B3LYP enthalpy: -2643.778927 a.u.

B3LYP free energy: -2643.9079 a.u.

M06 SCF energy in solution: -2643.784624 a.u.

Imaginary frequency: -160.37 cm<sup>-1</sup>

Cartesian coordinates

| ATOM | X           | Y           | Z          |
|------|-------------|-------------|------------|
| Ni   | -0.12898200 | -1.14930300 | 0.53161300 |
| C    | 1.69835300  | 2.88983200  | 1.32790900 |
| C    | 0.71628300  | 1.89230300  | 1.38079400 |
| C    | -0.61444300 | 2.24714700  | 1.04614000 |
| C    | -0.90914300 | 3.56162900  | 0.64856500 |
| C    | 0.08883100  | 4.53090100  | 0.58063100 |
| C    | 1.39287700  | 4.19542300  | 0.93200400 |
| H    | 2.72076900  | 2.65217800  | 1.59391100 |
| H    | -1.93183200 | 3.81822000  | 0.40052200 |
| H    | -0.15759300 | 5.53990500  | 0.26529600 |
| H    | 2.18062400  | 4.94238600  | 0.90112200 |
| C    | -1.74744700 | 1.31190300  | 1.16283600 |
| O    | -2.95583700 | 1.90274300  | 1.17728700 |
| C    | -3.94114000 | 0.83687400  | 1.12860300 |
| C    | -3.14350400 | -0.40698600 | 1.56872000 |
| H    | -4.30928300 | 0.77443700  | 0.09968000 |
| H    | -4.75469900 | 1.10361900  | 1.80179800 |
| N    | -1.72766100 | 0.02066800  | 1.27480400 |
| P    | 1.15824200  | 0.16518600  | 1.90045800 |
| C    | 0.71243900  | 0.07331400  | 3.67719400 |
| C    | 0.16874800  | -1.10805100 | 4.20073300 |
| C    | 0.97008000  | 1.15520300  | 4.53660700 |
| C    | -0.09024100 | -1.21638800 | 5.56774000 |

|   |             |             |             |
|---|-------------|-------------|-------------|
| H | -0.06787900 | -1.93804000 | 3.54389500  |
| C | 0.70442100  | 1.04378300  | 5.90099700  |
| H | 1.38207800  | 2.08104400  | 4.14588200  |
| C | 0.18153400  | -0.14429500 | 6.41858700  |
| H | -0.51867900 | -2.13254600 | 5.96216900  |
| H | 0.90873500  | 1.88337200  | 6.55915100  |
| H | -0.02026200 | -0.22985600 | 7.48245800  |
| C | 2.99231200  | 0.16157400  | 1.85591800  |
| C | 3.75167300  | -0.11656100 | 3.00132700  |
| C | 3.65452600  | 0.45144400  | 0.64979400  |
| C | 5.14685400  | -0.09459900 | 2.94166900  |
| H | 3.26268900  | -0.35171700 | 3.93942700  |
| C | 5.04625900  | 0.47958300  | 0.59703500  |
| H | 3.08241000  | 0.67301800  | -0.24551200 |
| C | 5.79600000  | 0.20618000  | 1.74474900  |
| H | 5.72286000  | -0.31146100 | 3.83634500  |
| H | 5.54513900  | 0.71286300  | -0.33911300 |
| H | 6.88115300  | 0.22812500  | 1.70321000  |
| C | 3.66068700  | -1.77226800 | -2.52515100 |
| C | 3.24540500  | -2.78229100 | -1.64284100 |
| C | 3.55039100  | -4.11717600 | -1.97035500 |
| C | 4.23150000  | -4.42786600 | -3.14689000 |
| C | 4.63418100  | -3.41063800 | -4.01629700 |
| C | 4.34991200  | -2.08175500 | -3.69965400 |
| H | 3.45343100  | -0.73394400 | -2.28213500 |
| H | 3.25715900  | -4.91453600 | -1.29275600 |
| H | 4.45085900  | -5.46530700 | -3.38329700 |
| H | 5.16920000  | -3.65270500 | -4.92992700 |
| H | 4.66727400  | -1.28319100 | -4.36458000 |
| C | -0.46342100 | -4.21848200 | -1.81471900 |
| C | -0.44299700 | -4.29252200 | -0.27501300 |
| C | -1.00598000 | -3.00033600 | 0.30232000  |
| C | -0.89190600 | -1.69205000 | -1.48463500 |
| C | -1.26397800 | -2.99094600 | -2.20644400 |
| H | -0.92925000 | -5.09862600 | -2.26228300 |
| H | 0.55404600  | -4.13349300 | -2.21145700 |
| H | -1.08710400 | -5.09311100 | 0.10194100  |
| H | 0.56427300  | -4.44921200 | 0.11499300  |
| O | -2.13870700 | -3.00577100 | -3.04707000 |
| O | -1.87111900 | -2.97105100 | 1.13202000  |
| C | -1.90282000 | -0.60273000 | -1.78099900 |
| H | -1.58013800 | 0.37333200  | -1.41575000 |
| H | -2.88995500 | -0.83871400 | -1.37498800 |
| H | -2.02335200 | -0.54034200 | -2.87053500 |
| C | 0.60373200  | -1.35721200 | -1.78035900 |
| H | 0.68004400  | -0.27981800 | -1.97944700 |
| H | 0.97478400  | -1.86560000 | -2.68172400 |
| C | 1.32381200  | -1.75254700 | -0.51728600 |
| C | 2.46254500  | -2.47097300 | -0.39728400 |
| C | 2.98837400  | -3.03727100 | 0.87756200  |
| C | 4.36475600  | -3.30821700 | 1.01358300  |
| C | 2.16076400  | -3.33518900 | 1.97666700  |
| C | 4.88389100  | -3.84399900 | 2.19023300  |
| H | 5.03516300  | -3.08507000 | 0.19109200  |
| C | 2.67809400  | -3.87204300 | 3.15569900  |
| H | 1.09414900  | -3.15459700 | 1.90761700  |
| C | 4.04414400  | -4.13242700 | 3.26834800  |
| H | 5.95027900  | -4.03849200 | 2.26372900  |
| H | 2.00929600  | -4.09885500 | 3.98157600  |
| H | 4.44806300  | -4.56177500 | 4.18068000  |
| C | -3.37644200 | -0.76782100 | 3.02890800  |
| C | -3.23524900 | 0.19487900  | 4.04033600  |
| C | -3.83947000 | -2.04384200 | 3.37173200  |

|   |             |             |            |
|---|-------------|-------------|------------|
| C | -3.55044300 | -0.11339000 | 5.36264900 |
| H | -2.89018900 | 1.19713600  | 3.79892800 |
| C | -4.15336500 | -2.35446600 | 4.69700000 |
| H | -3.96073200 | -2.79723800 | 2.60005000 |
| C | -4.01106900 | -1.39020900 | 5.69517600 |
| H | -3.44164600 | 0.64531400  | 6.13233900 |
| H | -4.51817200 | -3.34736700 | 4.94459300 |
| H | -4.26502500 | -1.62777500 | 6.72441000 |
| H | -3.38191000 | -1.26536600 | 0.94613500 |

## 26

B3LYP SCF energy: -2644.616735 a.u.

B3LYP enthalpy: -2643.802627 a.u.

B3LYP free energy: -2643.933371 a.u.

M06 SCF energy in solution: -2643.803166 a.u.

## Cartesian coordinates

| ATOM | X           | Y           | Z           |
|------|-------------|-------------|-------------|
| C    | 1.08744400  | 2.18775700  | 3.55714100  |
| C    | 1.35157100  | 1.29834700  | 2.50845100  |
| C    | 2.28997900  | 0.25806100  | 2.73108600  |
| C    | 2.91565700  | 0.14672300  | 3.98577500  |
| C    | 2.62901100  | 1.03772900  | 5.01666800  |
| C    | 1.71357300  | 2.06325400  | 4.80034200  |
| H    | 0.37234300  | 2.98867000  | 3.40972500  |
| H    | 3.63112500  | -0.64991800 | 4.14680100  |
| H    | 3.12055500  | 0.92724400  | 5.97811100  |
| H    | 1.47977000  | 2.76949500  | 5.59165400  |
| C    | 2.69246800  | -0.73198700 | 1.71072300  |
| O    | 3.80533800  | -1.41730300 | 2.01678000  |
| C    | 3.92775600  | -2.49006900 | 1.04396500  |
| C    | 3.03631400  | -2.01261900 | -0.11892400 |
| H    | 3.55148700  | -3.40472800 | 1.51009400  |
| H    | 4.98189700  | -2.58715800 | 0.78792000  |
| N    | 2.13303000  | -1.03394500 | 0.57668900  |
| P    | 0.51931700  | 1.53435200  | 0.86350300  |
| C    | 1.71903600  | 2.59484100  | -0.04433900 |
| C    | 2.16421000  | 2.21678800  | -1.31836700 |
| C    | 2.20549400  | 3.78382500  | 0.52914400  |
| C    | 3.06224500  | 3.02682000  | -2.01843700 |
| H    | 1.82757000  | 1.28695300  | -1.76283700 |
| C    | 3.09975400  | 4.58899200  | -0.17365700 |
| H    | 1.88619700  | 4.08532800  | 1.52217200  |
| C    | 3.52564200  | 4.21370600  | -1.45152600 |
| H    | 3.40292500  | 2.71937100  | -3.00249200 |
| H    | 3.46531000  | 5.50741900  | 0.27650800  |
| H    | 4.22179400  | 4.84365500  | -1.99796600 |
| C    | -0.92383700 | 2.60082100  | 1.25532400  |
| C    | -1.12678500 | 3.84070800  | 0.63385200  |
| C    | -1.88299100 | 2.13108000  | 2.17045100  |
| C    | -2.25880900 | 4.60194400  | 0.93545600  |
| H    | -0.41260300 | 4.21329000  | -0.09130900 |
| C    | -3.00464300 | 2.89916700  | 2.47712100  |
| H    | -1.74719900 | 1.17045600  | 2.66039600  |
| C    | -3.19498700 | 4.13845900  | 1.85877500  |
| H    | -2.40354900 | 5.55988800  | 0.44486200  |
| H    | -3.72838800 | 2.53276300  | 3.19982500  |
| H    | -4.07029500 | 4.73615700  | 2.09591400  |
| C    | 3.82033600  | -1.41558300 | -1.27506500 |
| C    | 4.63534000  | -0.28847200 | -1.10138400 |
| C    | 3.81466400  | -2.06092700 | -2.51734100 |
| C    | 5.42416800  | 0.18198800  | -2.15118200 |

|    |             |             |             |
|----|-------------|-------------|-------------|
| H  | 4.66327000  | 0.22470600  | -0.14391600 |
| C  | 4.60197600  | -1.59136300 | -3.56992000 |
| H  | 3.19799200  | -2.94507100 | -2.66242600 |
| C  | 5.40908200  | -0.46753200 | -3.38836600 |
| H  | 6.05401800  | 1.05401600  | -2.00057500 |
| H  | 4.58728700  | -2.10539700 | -4.52662000 |
| H  | 6.02781900  | -0.10311300 | -4.20336400 |
| H  | 2.43635700  | -2.84637000 | -0.48307000 |
| Ni | 0.18452100  | -0.72935200 | 0.04784100  |
| C  | -4.76981300 | -0.24712300 | 0.52213100  |
| C  | -4.08217000 | -0.38936300 | -0.69219900 |
| C  | -4.74036700 | -0.99697700 | -1.77393900 |
| C  | -6.04868700 | -1.46366400 | -1.63881700 |
| C  | -6.72273700 | -1.31975400 | -0.42385300 |
| C  | -6.08226400 | -0.70511500 | 0.65398900  |
| H  | -4.27811200 | 0.24418800  | 1.35737200  |
| H  | -4.22787500 | -1.09069400 | -2.72830100 |
| H  | -6.54363500 | -1.93268100 | -2.48463100 |
| H  | -7.74282600 | -1.67808800 | -0.32017000 |
| H  | -6.60548700 | -0.57895000 | 1.59792200  |
| C  | -0.29008400 | -4.04618900 | -0.97315100 |
| C  | -0.56379000 | -2.94480800 | -2.01747400 |
| C  | 0.09765500  | -1.62572200 | -1.66843900 |
| C  | -0.60316000 | -2.35675100 | 0.99258800  |
| C  | 0.07161400  | -3.55982100 | 0.43017500  |
| H  | 0.53341300  | -4.68934400 | -1.29361700 |
| H  | -1.17304600 | -4.69353800 | -0.89024000 |
| H  | -0.20948000 | -3.23743400 | -3.01166200 |
| H  | -1.63193700 | -2.72313000 | -2.10346500 |
| O  | 0.93051800  | -4.15940900 | 1.06866100  |
| O  | 0.73312400  | -0.93088400 | -2.40707200 |
| C  | -0.33551100 | -2.11552100 | 2.45998700  |
| H  | -0.56442500 | -1.08658700 | 2.75694600  |
| H  | 0.68740100  | -2.36282400 | 2.74063300  |
| H  | -1.00126300 | -2.77085000 | 3.04316700  |
| C  | -2.00020100 | -1.95997100 | 0.51350800  |
| H  | -2.65508500 | -1.78708900 | 1.37562200  |
| H  | -2.49780000 | -2.73176100 | -0.08969800 |
| C  | -1.71556700 | -0.68729200 | -0.25081800 |
| C  | -2.65867400 | 0.08302200  | -0.85362000 |
| C  | -2.47023100 | 1.30149800  | -1.67644600 |
| C  | -3.55405200 | 2.18583700  | -1.86153800 |
| C  | -1.24944700 | 1.62963200  | -2.29494800 |
| C  | -3.41494600 | 3.34948400  | -2.61389500 |
| H  | -4.51078700 | 1.96378300  | -1.40286000 |
| C  | -1.11250900 | 2.79179700  | -3.05305800 |
| H  | -0.40808600 | 0.95852200  | -2.21062200 |
| C  | -2.19362700 | 3.65954000  | -3.21649500 |
| H  | -4.26679900 | 4.01290900  | -2.73464900 |
| H  | -0.15857700 | 3.01255000  | -3.52382700 |
| H  | -2.08894700 | 4.56061600  | -3.81421600 |
